# Supplementary material for: Alerting trends in epidemiology for calcific aortic valve disease, 1990–2019: An age–period–cohort analysis for the Global Burden of Disease Study 2019
Source: PubMed Central journal article supplement — Eur Heart J Qual Care Clin Outcomes. 2023 Mar 9;9(5):459–73. doi: 10.1093/ehjqcco/qcad018 (PMC10405136; doi:10.1093/ehjqcco/qcad018), 2023-03-09
Supplement: qcad018_supplemental_file.pdf [file qcad018_supplemental_file.pdf]

## Supplemental Material

**Table S1. The lexis diagram of GBD data for the APC model**

| Period<br>(median)  | Age groups |           |           |           |           |           |           |           |           |           |           |           | Birth<br>cohort<br>(median) |
|---------------------|------------|-----------|-----------|-----------|-----------|-----------|-----------|-----------|-----------|-----------|-----------|-----------|-----------------------------|
|                     | 40-<br>44  | 45-<br>49 | 50-<br>54 | 55-<br>59 | 60-<br>64 | 65-<br>69 | 70-<br>74 | 75-<br>79 | 80-<br>84 | 85-<br>89 | 90-<br>94 | 95-<br>99 |                             |
|                     |            |           |           |           |           |           |           |           |           |           |           | X         | 1891-1899<br>(1895)         |
|                     |            |           |           |           |           |           |           |           |           |           | X         | X         | 1896-1904<br>(1900)         |
|                     |            |           |           |           |           |           |           |           |           | X         | X         | X         | 1901-1909<br>(1905)         |
|                     |            |           |           |           |           |           |           |           | X         | X         | X         | X         | 1906-1914<br>(1910)         |
|                     |            |           |           |           |           |           |           | X         | X         | X         | X         | X         | 1911-1919<br>(1915)         |
|                     |            |           |           |           |           |           | X         | X         | X         | X         | X         | X         | 1916-1924<br>(1920)         |
|                     |            |           |           |           |           | X         | X         | X         | X         | X         | X         |           | 1921-1929<br>(1925)         |
|                     |            |           |           |           | X         | X         | X         | X         | X         | X         |           |           | 1926-1934<br>(1930)         |
|                     |            |           |           | X         | X         | X         | X         | X         | X         |           |           |           | 1931-1939<br>(1935)         |
|                     |            |           | X         | X         | X         | X         | X         | X         |           |           |           |           | 1936-1944<br>(1940)         |
|                     |            | X         | X         | X         | X         | X         | X         |           |           |           |           |           | 1941-1949<br>(1945)         |
|                     | <b>X</b>   | X         | X         | X         | X         | X         |           |           |           |           |           |           | 1946-1954<br>(1950)         |
| 1990-1994<br>(1992) | X          | X         | X         | X         | X         |           |           |           |           |           |           |           | 1951-1959<br>(1955)         |
| 1995-1999<br>(1997) | X          | X         | X         | X         |           |           |           |           |           |           |           |           | 1956-1964<br>(1960)         |
| 2000-2004<br>(2002) | X          | X         | X         |           |           |           |           |           |           |           |           |           | 1961-1969<br>(1965)         |
| 2005-2009<br>(2007) | X          | X         |           |           |           |           |           |           |           |           |           |           | 1966-1974<br>(1970)         |
| 2010-2014<br>(2012) | X          |           |           |           |           |           |           |           |           |           |           |           | 1971-1979<br>(1975)         |
| 2015-2019<br>(2017) |            |           |           |           |           |           |           |           |           |           |           |           |                             |

Note: X denotes mortality data of each age group from the corresponding period. For instance, the DALYs rate of age 40-44 years in 1992 is filled in the square with a bold X (see table), and this square belongs to the cohort 1946-1954 (1950).

**Table S2. Time trends in CAVD mortality in 99 countries, 1990-2019**

| SDI | Country                          | Population                         |                             | Deaths             |                             | All-age mortality    |                             | Age-standardized mortality |                             | Net drift of mortality from APC model, % per year |
|-----|----------------------------------|------------------------------------|-----------------------------|--------------------|-----------------------------|----------------------|-----------------------------|----------------------------|-----------------------------|---------------------------------------------------|
|     |                                  | Number in 2019                     | Percent change 1990-2019, % | Number in 2019     | Percent change 1990-2019, % | Rate in 2019         | Percent change 1990-2019, % | Rate in 2019               | Percent change 1990-2019, % |                                                   |
| Low | Bangladesh                       | 159259850<br>(141199841,177852818) | 46.0                        | 933<br>(616, 1326) | 232.7<br>(96.3, 486.6)      | 0.59<br>(0.39, 0.83) | 127.8<br>(34.4, 301.7)      | 0.85<br>(0.56, 1.22)       | 17.4<br>(-26.8, 103.3)      | 0.52<br>(-0.02, 1.06)                             |
| Low | Pakistan                         | 224062847<br>(207077327,241657356) | 98.6                        | 791<br>(511, 1072) | 108.7<br>(64, 179)          | 0.35<br>(0.23, 0.48) | 5.1<br>(-17.4, 40.5)        | 0.92<br>(0.61, 1.22)       | 20.3<br>(-5.7, 60.0)        | 0.41<br>(-0.06, 0.87)                             |
| Low | Democratic Republic of the Congo | 87670444<br>(61748630,112590350)   | 127.2                       | 270<br>(174, 400)  | 136.9<br>(65.8, 249.6)      | 0.31<br>(0.20, 0.46) | 4.3<br>(-27.0, 53.9)        | 0.97<br>(0.66, 1.38)       | 1.8<br>(-26.2, 44.7)        | -0.02<br>(-1.06, 1.03)                            |
| Low | Ethiopia                         | 107591164<br>(92024285,122776186)  | 109.4                       | 241<br>(177, 334)  | 78<br>(2.7, 281.3)          | 0.22<br>(0.16, 0.31) | -15.0<br>(-51.0, 82.1)      | 0.71<br>(0.53, 1.01)       | -15.7<br>(-48.8, 61.6)      | -1.23<br>(-2.33, -0.11)                           |
| Low | United Republic of Tanzania      | 56736116<br>(50495485,63230443)    | 119.0                       | 214<br>(146, 303)  | 115.9<br>(44.2, 233.3)      | 0.38<br>(0.26, 0.53) | -1.4<br>(-34.2, 52.2)       | 1.06<br>(0.70, 1.49)       | -5.8<br>(-36.2, 40.8)       | -0.60<br>(-1.61, 0.43)                            |
| Low | Nepal                            | 30416382<br>(26611408,34238807)    | 55.7                        | 159<br>(111, 221)  | 247.2<br>(140.3, 426.3)     | 0.52<br>(0.36, 0.73) | 123.0<br>(54.4, 238.1)      | 0.89<br>(0.61, 1.27)       | 37.2<br>(-2.3, 109.1)       | 0.87<br>(-0.44, 2.19)                             |
| Low | Yemen                            | 31502896<br>(26596895,36775107)    | 129.5                       | 119<br>(80, 168)   | 185.7<br>(94.6, 349.1)      | 0.38<br>(0.25, 0.53) | 24.5<br>(-15.2, 95.7)       | 0.93<br>(0.64, 1.28)       | 0.4<br>(-29.5, 55.3)        | -0.03<br>(-1.77, 1.74)                            |
| Low | Afghanistan                      | 38277536<br>(26161826,50468583)    | 235.2                       | 112<br>(57, 180)   | 94.4<br>(39.1, 192.8)       | 0.29<br>(0.15, 0.47) | -42.0<br>(-58.5, -12.7)     | 0.87<br>(0.44, 1.31)       | -1.9<br>(-29.2, 47.6)       | -0.17<br>(-1.78, 1.46)                            |
| Low | Madagascar                       | 26690344<br>(20373798,32844324)    | 123.3                       | 105<br>(69, 148)   | 78.6<br>(28.8, 154)         | 0.39<br>(0.26, 0.55) | -20.0<br>(-42.3, 13.7)      | 1.17<br>(0.81, 1.58)       | -4.9<br>(-30.8, 34.5)       | -0.42<br>(-1.78, 0.97)                            |
| Low | Uganda                           | 41117856                           | 137.5                       | 102                | 127.4                       | 0.25                 | -4.2                        | 0.89                       | 6.7                         | -0.20                                             |

|            |                                          |                                       |       |                      |                         |                      |                        |                      |                        |                         |
|------------|------------------------------------------|---------------------------------------|-------|----------------------|-------------------------|----------------------|------------------------|----------------------|------------------------|-------------------------|
|            |                                          | (37023696,44955511)                   |       | (75, 139)            | (61.8, 222.1)           | (0.18, 0.34)         | (-31.8, 35.6)          | (0.63, 1.26)         | (-24.2, 49.8)          | (-1.63, 1.25)           |
| Low        | Mozambique                               | 29528037<br>(27057907,31808337)       | 125.9 | 97<br>(67, 131)      | 148.5<br>(77.4, 265.2)  | 0.33<br>(0.23, 0.44) | 10.0<br>(-21.5, 61.7)  | 1.12<br>(0.80, 1.57) | 31.1<br>(-7.3, 94.2)   | 1.23<br>(-0.31, 2.79)   |
| Low        | Angola                                   | 30138521<br>(27054840,33116641)       | 192.1 | 87<br>(66, 115)      | 210.8<br>(101.7, 416.1) | 0.29<br>(0.22, 0.38) | 6.4<br>(-30.9, 76.7)   | 1.06<br>(0.80, 1.38) | 17.1<br>(-22.9, 89)    | 0.29<br>(-1.77, 2.39)   |
| Low        | Haiti                                    | 12402099<br>(10373558,14713362)       | 95.1  | 73<br>(42, 114)      | 95.4<br>(40.7, 179.1)   | 0.59<br>(0.34, 0.92) | 0.1<br>(-27.9, 43.0)   | 1.22<br>(0.73, 1.82) | -10.5<br>(-36.7, 28.7) | -0.31<br>(-1.95, 1.35)  |
| Low        | Burkina Faso                             | 22691773<br>(19383320,26173262)       | 137.4 | 65<br>(37, 102)      | 166.5<br>(98.4, 271.9)  | 0.29<br>(0.16, 0.45) | 12.3<br>(-16.4, 56.7)  | 0.73<br>(0.44, 1.14) | 26.9<br>(-4.4, 75.8)   | 1.17<br>(-1.76, 4.18)   |
| Low        | Côte d'Ivoire                            | 26171532<br>(23573125,28872979)       | 114.1 | 60<br>(36, 94)       | 154.5<br>(76.3, 276)    | 0.23<br>(0.14, 0.36) | 18.9<br>(-17.6, 75.6)  | 0.56<br>(0.34, 0.84) | -1.4<br>(-27.4, 40.1)  | -0.13<br>(-3.08, 2.92)  |
| Low        | Malawi                                   | 18442238<br>(17149774,19745167)       | 93.0  | 54<br>(39, 73)       | 111.5<br>(41.0, 217.4)  | 0.29<br>(0.21, 0.40) | 9.6<br>(-27.0, 64.5)   | 0.91<br>(0.65, 1.27) | 7.3<br>(-25.5, 56.2)   | 0.13<br>(-1.85, 2.15)   |
| Low-middle | India                                    | 1390706968<br>(1237773390,1558771721) | 62.5  | 6862<br>(5181, 8945) | 191.2<br>(121.2, 312.3) | 0.49<br>(0.37, 0.64) | 79.2<br>(36.1, 153.7)  | 0.73<br>(0.56, 0.94) | -2.8<br>(-24.7, 34.2)  | -0.22<br>(-0.48, 0.05)  |
| Low-middle | Nigeria                                  | 214823786<br>(193132521,236573636)    | 138.2 | 427<br>(292, 617)    | 51.3<br>(-4.2, 173.4)   | 0.20<br>(0.14, 0.29) | -36.5<br>(-59.8, 14.8) | 0.51<br>(0.36, 0.69) | -23.7<br>(-50.4, 31.4) | -1.27<br>(-1.95, -0.58) |
| Low-middle | Morocco                                  | 35952186<br>(32338676,39427377)       | 42.1  | 283<br>(196, 376)    | 156.3<br>(92.1, 282.7)  | 0.79<br>(0.55, 1.05) | 80.3<br>(35.2, 169.2)  | 1.03<br>(0.69, 1.37) | 14.5<br>(-13.9, 72.4)  | 0.44<br>(-0.42, 1.30)   |
| Low-middle | Venezuela<br>(Bolivarian<br>Republic of) | 28068986<br>(24769383,31423834)       | 49.1  | 270<br>(202, 364)    | 205.5<br>(119.1, 335.6) | 0.96<br>(0.72, 1.30) | 104.9<br>(47.0, 192.2) | 0.97<br>(0.72, 1.30) | 2.6<br>(-26.0, 45.5)   | -0.42<br>(-1.3, 0.47)   |
| Low-middle | Viet Nam                                 | 96372928<br>(83066414,109007012)      | 41.8  | 245<br>(179, 341)    | 106.6<br>(51.3, 195.4)  | 0.25<br>(0.19, 0.35) | 45.6<br>(6.7, 108.2)   | 0.29<br>(0.22, 0.41) | -8.5<br>(-32.4, 30.6)  | -0.43<br>(-1.23, 0.38)  |
| Low-middle | Syrian Arab<br>Republic                  | 14491247<br>(12173713,16795620)       | 12.4  | 186<br>(129, 268)    | 21.8<br>(-18.3, 88.4)   | 1.29<br>(0.89, 1.85) | 8.4<br>(-27.3, 67.6)   | 1.81<br>(1.28, 2.57) | -41.9<br>(-61.5, -8.1) | -3.16<br>(-3.98, -2.33) |
| Low-middle | Sudan                                    | 40808425<br>(35356109,46009715)       | 102   | 163<br>(108, 242)    | 106.8<br>(36.6, 241.4)  | 0.40<br>(0.26, 0.59) | 2.4<br>(-32.4, 69.0)   | 0.88<br>(0.59, 1.27) | 0.4<br>(-32, 61.1)     | -0.13<br>(-1.36, 1.11)  |
| Low-middle | Kenya                                    | 50227709<br>(43651058,56751223)       | 116.6 | 151 (116, 196)       | 199.6<br>(130.2, 289.7) | 0.30<br>(0.23, 0.39) | 38.3<br>(6.3, 79.9)    | 0.92<br>(0.67, 1.25) | 25.4<br>(-5.6, 65.2)   | 0.73<br>(-0.54, 2.02)   |

|            |                                       |                                       |       |                      |                         |                      |                        |                      |                        |                         |
|------------|---------------------------------------|---------------------------------------|-------|----------------------|-------------------------|----------------------|------------------------|----------------------|------------------------|-------------------------|
| Low-middle | Philippines                           | 112142764<br>(101580880,121868835)    | 77.2  | 136<br>(111, 166)    | 332.5<br>(215.2, 436.1) | 0.12<br>(0.10, 0.15) | 144.1<br>(77.9, 202.6) | 0.20<br>(0.16, 0.24) | 39.2<br>(5.9, 70.3)    | 1.59<br>(-0.06, 3.28)   |
| Low-middle | Myanmar                               | 54676901<br>(48907818,60236349)       | 33.0  | 102<br>(78, 144)     | 71.7<br>(13.0, 171.9)   | 0.19<br>(0.14, 0.26) | 29.1<br>(-15.1, 104.4) | 0.25<br>(0.19, 0.34) | -14.5<br>(-40.4, 30.7) | -0.78<br>(-2.14, 0.61)  |
| Low-middle | Ghana                                 | 31536232<br>(27445271,35185758)       | 110.0 | 89<br>(55, 139)      | 203.8<br>(125.6, 341.8) | 0.28<br>(0.18, 0.44) | 44.7<br>(7.4, 110.4)   | 0.59<br>(0.38, 0.88) | 20.8<br>(-8.8, 70.2)   | 0.81<br>(-1.33, 3.00)   |
| Low-middle | Cameroon                              | 29101868<br>(24782960,33604810)       | 180.1 | 82<br>(49, 132)      | 217.7<br>(117.9, 391.0) | 0.28<br>(0.17, 0.45) | 13.5<br>(-22.2, 75.3)  | 0.68<br>(0.43, 1.04) | 14.5<br>(-18.0, 71.4)  | 0.41<br>(-1.83, 2.71)   |
| Low-middle | Dominican Republic                    | 10881855<br>(9629751,12279753)        | 51.1  | 75<br>(58, 97)       | 183.0<br>(110.7, 279.6) | 0.69<br>(0.53, 0.89) | 87.3<br>(39.5, 151.3)  | 0.85<br>(0.66, 1.09) | 12.5<br>(-15.8, 50.2)  | 1.45<br>(-0.33, 3.27)   |
| Low-middle | Bolivia<br>(Plurinational State of)   | 12011750<br>(10641659,13418191)       | 87.1  | 71<br>(50, 100)      | 187.8<br>(95.9, 370.1)  | 0.59<br>(0.42, 0.83) | 53.9<br>(4.7, 151.3)   | 0.88<br>(0.62, 1.22) | 6.4<br>(-27.1, 70.8)   | 0.09<br>(-1.80, 2.01)   |
| Low-middle | Zambia                                | 18237683<br>(15885855,20473278)       | 129.6 | 67<br>(49, 90)       | 236.3<br>(135.6, 408.9) | 0.37<br>(0.27, 0.49) | 46.5<br>(2.6, 121.6)   | 1.27<br>(0.95, 1.67) | 44.1<br>(2.2, 116.2)   | 1.27<br>(-0.91, 3.51)   |
| Low-middle | Democratic People's Republic of Korea | 26232861<br>(22628875,29910477)       | 24.6  | 62<br>(46, 86)       | 67.9<br>(19.0, 135.0)   | 0.24<br>(0.18, 0.33) | 34.8<br>(-4.5, 88.6)   | 0.20<br>(0.15, 0.28) | -16.6<br>(-39.4, 13.4) | -0.85<br>(-2.66, 0.99)  |
| Middle     | Brazil                                | 216664814<br>(189879232,242502434)    | 45.6  | 3467<br>(3001, 4003) | 130.0<br>(107.1, 160.1) | 1.60<br>(1.38, 1.85) | 58.0<br>(42.2, 78.7)   | 1.54<br>(1.33, 1.78) | -15.6<br>(-24.0, -4.0) | -0.73<br>(-0.96, -0.49) |
| Middle     | China                                 | 1422350422<br>(1239302360,1597063538) | 20.2  | 2799<br>(2225, 3396) | 91.5<br>(23.6, 235.2)   | 0.20<br>(0.16, 0.24) | 59.3<br>(2.9, 178.9)   | 0.15<br>(0.12, 0.18) | -17.1<br>(-46.9, 45.8) | -0.83<br>(-1.15, -0.51) |
| Middle     | MexICO                                | 124940175<br>(108607132,140630348)    | 46.1  | 823<br>(686, 980)    | 237.0<br>(179.3, 298.0) | 0.66<br>(0.55, 0.78) | 130.6<br>(91.1, 172.3) | 0.73<br>(0.61, 0.87) | 23.9<br>(1.8, 45.2)    | 0.39<br>(-0.19, 0.97)   |
| Middle     | Colombia                              | 47776679<br>(44174337,51539501)       | 46.8  | 664<br>(478, 933)    | 159.6<br>(88.9, 259.3)  | 1.39<br>(1.00, 1.95) | 76.8<br>(28.7, 144.8)  | 1.25<br>(0.90, 1.76) | -15.5<br>(-38.7, 16.8) | -0.01<br>(-0.60, 0.59)  |
| Middle     | Egypt                                 | 99069551<br>(90571861,107515771)      | 77.9  | 658<br>(471, 929)    | 128.7<br>(62.3, 245.5)  | 0.66<br>(0.48, 0.94) | 28.6<br>(-8.7, 94.3)   | 1.11<br>(0.79, 1.54) | 6.4<br>(-25.9, 63.3)   | 0.28<br>(-0.42, 0.99)   |
| Middle     | Iran (Islamic Republic of)            | 84297882<br>(77330567,91935910)       | 44.0  | 629<br>(564, 761)    | 161.0<br>(114.9, 242.9) | 0.75<br>(0.67, 0.90) | 81.3<br>(49.2, 138.2)  | 0.90<br>(0.80, 1.11) | -13.8<br>(-29.6, 14.2) | -0.52<br>(-1.14, 0.11)  |

|                 |              |                                    |       |                      |                          |                        |                         |                      |                         |                         |
|-----------------|--------------|------------------------------------|-------|----------------------|--------------------------|------------------------|-------------------------|----------------------|-------------------------|-------------------------|
| Middle          | Indonesia    | 259465835<br>(226843397,291997879) | 40.0  | 540<br>(362, 748)    | 150.0<br>(70.8, 248.0)   | 0.21<br>(0.14, 0.29)   | 78.6<br>(22.0, 148.6)   | 0.30<br>(0.21, 0.42) | 18.0<br>(-16.1, 61.3)   | 0.49<br>(-0.15, 1.13)   |
| Middle          | Thailand     | 70111586<br>(61328965,78909536)    | 23.3  | 360<br>(264, 473)    | 303.7<br>(175.3, 480.1)  | 0.51<br>(0.38, 0.67)   | 227.5<br>(123.4, 370.6) | 0.37<br>(0.27, 0.49) | 29.0<br>(-11.1, 83.9)   | 0.09<br>(-0.74, 0.93)   |
| Middle          | South Africa | 55588425<br>(49169682,62724694)    | 50.9  | 349<br>(284, 395)    | 95.0<br>(66.6, 124.3)    | 0.63<br>(0.51, 0.71)   | 29.2<br>(10.4, 48.6)    | 0.96<br>(0.79, 1.09) | 3.6<br>(-10.1, 18.4)    | -0.30<br>(-1.00, 0.40)  |
| Middle          | Uruguay      | 3436137<br>(3031175,3876964)       | 9.5   | 343<br>(287, 392)    | 150.1<br>(110.5, 194.6)  | 9.98<br>(8.35, 11.4)   | 128.5<br>(92.3, 169.2)  | 5.18<br>(4.38, 5.88) | 43.1<br>(21.4, 68.0)    | 0.87<br>(-0.21, 1.95)   |
| Middle          | Algeria      | 41847290<br>(36020518,47461912)    | 65.5  | 294<br>(191, 400)    | 144.1<br>(65.2, 263.0)   | 0.70<br>(0.46, 0.96)   | 47.5<br>(-0.2, 119.3)   | 0.98<br>(0.65, 1.30) | -16.8<br>(-43.4, 23.5)  | -0.59<br>(-2.19, 1.03)  |
| Middle          | Cuba         | 11358510<br>(10094746,12738845)    | 4.9   | 195<br>(152, 258)    | 106.8<br>(58.6, 172.0)   | 1.72<br>(1.34, 2.27)   | 97.2<br>(51.3, 159.4)   | 1.03<br>(0.80, 1.37) | 11.9<br>(-14.3, 46.6)   | 0.39<br>(-0.57, 1.35)   |
| Middle          | Sri Lanka    | 21854452<br>(19445064,24139979)    | 26.9  | 152<br>(111, 206)    | 69.9<br>(20.1, 147.0)    | 0.69<br>(0.51, 0.94)   | 33.9<br>(-5.3, 94.6)    | 0.63<br>(0.46, 0.86) | -32.0<br>(-52.1, -1.5)  | -1.58<br>(-2.71, -0.45) |
| Middle          | Ecuador      | 17588392<br>(15403894,19749863)    | 75.4  | 123<br>(93, 160)     | 295.7<br>(184.0, 455.6)  | 0.70<br>(0.53, 0.91)   | 125.6<br>(61.9, 216.7)  | 0.86<br>(0.66, 1.11) | 45.4<br>(4.1, 104.0)    | 1.88<br>(0.17, 3.63)    |
| Middle          | Paraguay     | 6930455<br>(5699198,8110997)       | 71.3  | 116<br>(86, 149)     | 355.9<br>(227.6, 533.5)  | 1.67<br>(1.25, 2.14)   | 166.1<br>(91.2, 269.8)  | 2.20<br>(1.64, 2.82) | 80.8<br>(31.0, 147.3)   | 2.59<br>(1.06, 4.14)    |
| Middle          | Tunisia      | 11571604<br>(10423733,12757923)    | 37.1  | 108<br>(69, 154)     | 151.4<br>(74.5, 267.9)   | 0.93<br>(0.60, 1.33)   | 83.4<br>(27.3, 168.3)   | 0.92<br>(0.59, 1.31) | -4.5<br>(-33.2, 39.5)   | -0.17<br>(-1.73, 1.41)  |
| Middle          | Peru         | 33995397<br>(31120105,36626226)    | 56.4  | 97<br>(70, 131)      | 55.1<br>(-0.5, 145.5)    | 0.29<br>(0.21, 0.39)   | -0.8<br>(-36.4, 56.9)   | 0.30<br>(0.22, 0.41) | -42.3<br>(-61.6, -9.7)  | -2.26<br>(-3.44, -1.07) |
| Middle          | Iraq         | 42119490<br>(31429294,52981880)    | 139.4 | 79<br>(54, 104)      | 242.2<br>(121.6, 466.4)  | 0.19<br>(0.13, 0.25)   | 43.0<br>(-7.4, 136.6)   | 0.35<br>(0.25, 0.46) | 18.7<br>(-21.5, 93.2)   | 0.60<br>(-1.25, 2.50)   |
| Middle          | Uzbekistan   | 33677096<br>(25411001,42319371)    | 60.8  | 68<br>(50, 96)       | 496.0<br>(229.7, 1126.6) | 0.20<br>(0.15, 0.28)   | 270.7<br>(105.1, 663.0) | 0.46<br>(0.33, 0.66) | 342.3<br>(133.5, 866.2) | 6.40<br>(3.82, 9.05)    |
| Middle          | Costa Rica   | 4716744<br>(4164759,5271508)       | 55.2  | 67<br>(51, 87)       | 284.7<br>(187.8, 408.4)  | 1.43<br>(1.09, 1.84)   | 147.9<br>(85.5, 227.6)  | 1.31<br>(1.00, 1.69) | 27.7<br>(-4.6, 69.6)    | 0.94<br>(-0.91, 2.83)   |
| High-<br>middle | Spain        | 46021218<br>(42087988,49981539)    | 18.7  | 5153<br>(4177, 6116) | 205.6<br>(161.9, 54.6)   | 11.20<br>(9.08, 13.29) | 157.5<br>(120.7, 198.9) | 4.00<br>(3.30, 4.68) | 24.6<br>(9.2, 42.3)     | -1.18<br>(-1.51,-0.84)  |

|             |                        |                                 |       |                      |                           |                        |                           |                      |                          |                         |
|-------------|------------------------|---------------------------------|-------|----------------------|---------------------------|------------------------|---------------------------|----------------------|--------------------------|-------------------------|
| High-middle | Italy                  | 60313170<br>(55356080,64983929) | 6.2   | 4376<br>(3436, 4957) | 281.3<br>(173.6, 331.3)   | 7.25<br>(5.70, 8.22)   | 259.1<br>(157.6, 306.2)   | 2.30<br>(1.83, 2.59) | 78.1<br>(28.6, 100.4)    | -0.28<br>(-0.61, 0.05)  |
| High-middle | Argentina              | 45115284<br>(39507183,51073381) | 36.2  | 2166<br>(1869, 2414) | 95.8<br>(69.3, 127.1)     | 4.80<br>(4.14, 5.35)   | 43.7<br>(24.3, 66.7)      | 3.87<br>(3.34, 4.30) | -1.3<br>(-14.6, 14.1)    | -0.46<br>(-0.80, -0.12) |
| High-middle | Poland                 | 38434445<br>(35378981,41364935) | 0.7   | 1522<br>(1122, 1932) | 1487.9<br>(790.8, 2540.8) | 3.96<br>(2.92, 5.03)   | 1476.4<br>(784.3, 2521.8) | 2.05<br>(1.52, 2.61) | 791.8<br>(402.6, 1397.9) | 8.46<br>(7.66, 9.27)    |
| High-middle | Greece                 | 10337172<br>(9070617,11489319)  | -0.5  | 1077<br>(907, 1241)  | 210.8<br>(161.6, 282.8)   | 10.42<br>(8.77, 12.01) | 212.3<br>(163.0, 284.7)   | 3.33<br>(2.83, 3.83) | 36.2<br>(15.2, 67.4)     | 0.37<br>(-0.36, 1.10)   |
| High-middle | Portugal               | 10651263<br>(9433153,11909037)  | 5.1   | 955<br>(778, 1081)   | 425.4<br>(327.8, 571.8)   | 8.96<br>(7.31, 10.15)  | 400.1<br>(307.2, 539.3)   | 3.18<br>(2.61, 3.59) | 121.1<br>(85.9, 188)     | 1.88<br>(1.11, 2.65)    |
| High-middle | Turkey                 | 81359693<br>(71366134,91236684) | 36.1  | 851<br>(632, 1093)   | 82.3<br>(25.1, 210.0)     | 1.05<br>(0.78, 1.34)   | 33.9<br>(-8.1, 127.7)     | 1.03<br>(0.76, 1.32) | -28.9<br>(-51.7, 21.4)   | -1.65<br>(-2.06, -1.23) |
| High-middle | Hungary                | 9674413<br>(8515522,10788963)   | -6.9  | 820<br>(641, 997)    | 159.7<br>(102.0, 231.7)   | 8.47<br>(6.62, 10.3)   | 179.0<br>(117.0, 256.3)   | 3.95<br>(3.11, 4.80) | 77.2<br>(37.1, 124.7)    | 1.24<br>(0.69, 1.80)    |
| High-middle | Israel                 | 9309583<br>(8164697,10550907)   | 87.6  | 488<br>(396, 555)    | 201.3<br>(151.1, 249.0)   | 5.25<br>(4.25, 5.97)   | 60.6<br>(33.8, 86.0)      | 3.68<br>(3.02, 4.18) | -3.8<br>(-16.9, 9.5)     | -1.00<br>(-2.13, 0.15)  |
| High-middle | Serbia                 | 8746785<br>(7829777,9730592)    | -6.9  | 443<br>(339, 574)    | 278.9<br>(164.3, 502.7)   | 5.07<br>(3.88, 6.57)   | 307.1<br>(184.0, 547.5)   | 2.84<br>(2.20, 3.70) | 140.7<br>(65.9, 291.5)   | 2.90<br>(1.94, 3.88)    |
| High-middle | Chile                  | 18198359<br>(16753483,19617223) | 37.0  | 335<br>(294, 385)    | 134.6<br>(101.7, 173.2)   | 1.84<br>(1.62, 2.11)   | 71.2<br>(47.2, 99.4)      | 1.41<br>(1.24, 1.62) | -10.0<br>(-22.2, 4.2)    | -0.39<br>(-1.15, 0.38)  |
| High-middle | Romania                | 19237066<br>(17030070,21542480) | -17.8 | 299<br>(236, 364)    | 98.6<br>(53.8, 154.8)     | 1.55<br>(1.23, 1.89)   | 141.5<br>(87.0, 209.9)    | 0.77<br>(0.61, 0.94) | 32.0<br>(1.5, 69.8)      | 0.36<br>(-0.54, 1.27)   |
| High-middle | Croatia                | 4247902<br>(3748360,4764237)    | -13.3 | 298<br>(208, 382)    | 793.3<br>(214.6, 1478.6)  | 7.01<br>(4.89, 8.99)   | 930.6<br>(263.0, 1721.1)  | 3.04<br>(2.13, 3.89) | 435.2<br>(89.5, 831.8)   | 6.74<br>(5.09, 8.42)    |
| High-middle | Ukraine                | 44042431<br>(35745535,52268016) | -16.4 | 185<br>(154, 221)    | 87.7<br>(48.6, 146.6)     | 0.42<br>(0.35, 0.50)   | 124.4<br>(77.6, 194.9)    | 0.25<br>(0.21, 0.30) | 74.9<br>(36.7, 130.5)    | 1.79<br>(0.81, 2.78)    |
| High-middle | Malaysia               | 31301402<br>(27339262,35190542) | 77.3  | 120<br>(93, 155)     | 267.4<br>(174.4, 396.5)   | 0.38<br>(0.3, 0.49)    | 107.2<br>(54.8, 180.1)    | 0.52<br>(0.40, 0.66) | 34.1<br>(0.4, 81.5)      | 1.33<br>(-0.13, 2.82)   |
| High-middle | Bosnia and Herzegovina | 3299982<br>(2949576,3649228)    | -27.3 | 81<br>(62, 107)      | 154.2<br>(79.7, 287.6)    | 2.45<br>(1.87, 3.24)   | 249.5<br>(147.2, 433.0)   | 1.45<br>(1.11, 1.89) | 36.4<br>(-5.6, 103.3)    | 0.92<br>(-0.83, 2.71)   |

|             |                          |                                    |       |                         |                         |                         |                         |                      |                         |                         |
|-------------|--------------------------|------------------------------------|-------|-------------------------|-------------------------|-------------------------|-------------------------|----------------------|-------------------------|-------------------------|
| High-middle | Bulgaria                 | 6934625<br>(6359976,7553856)       | -20.1 | 69<br>(52, 89)          | 187.8<br>(66.3, 337.5)  | 1.00<br>(0.75, 1.28)    | 260.3<br>(108.1, 447.7) | 0.48<br>(0.36, 0.62) | 127.6<br>(30.3, 249.4)  | 3.52<br>(0.95, 6.14)    |
| High-middle | Lebanon                  | 5177069<br>(4455291,5928542)       | 58.1  | 58<br>(39, 84)          | 118.1<br>(56.6, 226.2)  | 1.11<br>(0.75, 1.63)    | 37.9<br>(-0.9, 106.4)   | 1.11<br>(0.74, 1.61) | -14.2<br>(-39, 29.2)    | -0.64<br>(-2.49, 1.24)  |
| High        | United States of America | 327978730<br>(285959303,369324168) | 29.3  | 24826<br>(20354, 27718) | 100.5<br>(83.8, 113.8)  | 7.57<br>(6.21, 8.45)    | 55.0<br>(42.1, 65.3)    | 3.73<br>(3.11, 4.12) | 1.8<br>(-5.2, 7.7)      | -1.67<br>(-1.83, -1.52) |
| High        | Germany                  | 84914056<br>(77688648,92219489)    | 6.2   | 13154<br>(11099, 15132) | 115.9<br>(80.7, 155.9)  | 15.49<br>(13.07, 17.82) | 103.3<br>(70.1, 140.9)  | 5.47<br>(4.61, 6.26) | 18.1<br>(0.2, 38.7)     | -0.39<br>(-0.76, -0.01) |
| High        | Japan                    | 127788411<br>(115774123,139878471) | 1.5   | 12868<br>(8512, 15732)  | 209.9<br>(137.4, 252.6) | 10.07<br>(6.66, 12.31)  | 205.2<br>(133.8, 247.3) | 2.14<br>(1.49, 2.55) | -23.9<br>(-38.4, -14.1) | -2.57<br>(-2.85, -2.29) |
| High        | France                   | 66204315<br>(60093850,72433669)    | 14.6  | 8029<br>(6387, 9225)    | 81.3<br>(54.1, 106.8)   | 12.13<br>(9.65, 13.93)  | 58.2<br>(34.5, 80.4)    | 4.04<br>(3.28, 4.61) | -18.8<br>(-29.5, -8.4)  | -2.46<br>(-2.74, -2.18) |
| High        | United Kingdom           | 67220447<br>(60468668,73925429)    | 17.0  | 5409<br>(4572, 5893)    | 81.4<br>(61.8, 104.8)   | 8.05<br>(6.80, 8.77)    | 55.1<br>(38.4, 75.1)    | 3.62<br>(3.09, 3.94) | 13.3<br>(3.3, 27.2)     | -0.65<br>(-0.92, -0.38) |
| High        | Canada                   | 36519840<br>(33331463,39599796)    | 34.0  | 2359<br>(1901, 2649)    | 205.2<br>(160.9, 244.6) | 6.46<br>(5.21, 7.25)    | 127.8<br>(94.7, 157.2)  | 2.93<br>(2.40, 3.28) | 18.7<br>(2.8, 33.4)     | -0.78<br>(-1.23, -0.32) |
| High        | Netherlands              | 17156788<br>(15675163,18613311)    | 15.0  | 2054<br>(1614, 2412)    | 152.5<br>(83.6, 210.7)  | 11.97<br>(9.41, 14.06)  | 119.6<br>(59.7, 170.2)  | 5.26<br>(4.15, 6.14) | 32.3<br>(-3.1, 62.6)    | -1.12<br>(-1.68, -0.57) |
| High        | Belgium                  | 11419166<br>(10536911,12317981)    | 14.4  | 1703<br>(1323, 1960)    | 157.2<br>(102.9, 204.2) | 14.91<br>(11.59, 17.17) | 124.7<br>(77.3, 165.8)  | 5.44<br>(4.33, 6.21) | 28.3<br>(2.7, 51.6)     | -1.25<br>(-1.95, -0.54) |
| High        | Australia                | 24568113<br>(22510058,26779186)    | 45.7  | 1435<br>(1167, 1648)    | 136.8<br>(107.7, 162.9) | 5.84<br>(4.75, 6.71)    | 62.5<br>(42.6, 80.4)    | 2.89<br>(2.36, 3.31) | -12.2<br>(-22.2, -3.2)  | -1.79<br>(-2.36, -1.22) |
| High        | Russian Federation       | 146717427<br>(128850161,165171807) | -2.9  | 1249<br>(1015, 1503)    | 209.5<br>(147.8, 323.2) | 0.85<br>(0.69, 1.02)    | 218.6<br>(155.0, 335.6) | 0.54<br>(0.44, 0.66) | 126.8<br>(82.3, 206.8)  | 3.50<br>(3.05, 3.96)    |
| High        | Sweden                   | 10222546<br>(9312312,11127453)     | 19.0  | 1209<br>(979, 1406)     | 78.7<br>(58.9, 102.3)   | 11.83<br>(9.58, 13.75)  | 50.1<br>(33.5, 70.0)    | 4.39<br>(3.63, 5.06) | 9.5<br>(-1.5, 22.9)     | -0.97<br>(-1.74, -0.18) |
| High        | Austria                  | 8916185<br>(8169639,9666456)       | 14.8  | 980<br>(787, 1133)      | 184.5<br>(135.6, 250.2) | 10.99<br>(8.83, 12.71)  | 147.9<br>(105.3, 205.1) | 4.31<br>(3.52, 4.96) | 51.5<br>(26.7, 85.1)    | -0.59<br>(-1.33, 0.16)  |
| High        | Switzerland              | 8775204                            | 27.8  | 746                     | 90.5                    | 8.50                    | 49.0                    | 3.18                 | -6.1                    | -1.39                   |

|      |                               |                     |       |            |                 |                |                 |              |                 |                |
|------|-------------------------------|---------------------|-------|------------|-----------------|----------------|-----------------|--------------|-----------------|----------------|
|      |                               | (8021728,9564584)   |       | (581, 880) | (61.8, 126.5)   | (6.62, 10.03)  | (26.6, 77.2)    | (2.52, 3.71) | (-19.8, 11.0)   | (-2.41, -0.37) |
| High | Finland                       | 5534095             | 10.5  | 744        | 153.5           | 13.45          | 129.5           | 4.90         | 19.9            | 0.10           |
|      |                               | (5086541,5991975)   |       | (595, 863) | (106.7, 206.7)  | (10.74, 15.6)  | (87.1, 177.7)   | (3.95, 5.67) | (-0.6, 44.1)    | (-0.75, 0.95)  |
| High | Norway                        | 5348847             | 25.9  | 691        | 62.3            | 12.92          | 28.8            | 5.72         | 3.1             | -0.98          |
|      |                               | (4936723,5754787)   |       | (548, 785) | (42.9, 78.3)    | (10.25, 14.67) | (13.5, 41.6)    | (4.56, 6.45) | (-8.0, 13.1)    | (-1.98, 0.03)  |
| High | Republic of Korea             | 53398252            | 20.4  | 664        | 486.5           | 1.24           | 387.0           | 0.83         | 58.4            | 0.71           |
|      |                               | (48441017,58407132) |       | (536, 787) | (341.6, 707.9)  | (1.00, 1.47)   | (266.6, 570.8)  | (0.67, 0.98) | (21.2, 117.9)   | (-0.15, 1.57)  |
| High | Denmark                       | 5802733             | 12.8  | 604        | 161.7           | 10.40          | 132.0           | 4.53         | 73.5            | 0.94           |
|      |                               | (5329985,6262192)   |       | (485, 687) | (123.6, 203.9)  | (8.37, 11.84)  | (98.3, 169.4)   | (3.69, 5.15) | (49.7, 101.0)   | (-0.12,2.02)   |
| High | Czechia                       | 10643487            | 3.4   | 598        | 1481.4          | 5.62           | 1430.0          | 2.69         | 853.5           | 7.30           |
|      |                               | (9779074,11500126)  |       | (437, 777) | (626.7, 2681.3) | (4.10, 7.30)   | (603.1, 2590.9) | (1.97, 3.51) | (333.6, 1559.1) | (6.06, 8.55)   |
| High | New Zealand                   | 4495667             | 31.6  | 431        | 161.4           | 9.58           | 98.7            | 4.79         | 8.2             | -1.10          |
|      |                               | (4005504,4968118)   |       | (346, 490) | (123.1, 191.4)  | (7.70, 10.89)  | (69.6, 121.5)   | (3.88, 5.41) | (-5.4, 19.7)    | (-2.19, 0.00)  |
| High | Taiwan<br>(Province of China) | 23620243            | 15.8  | 370        | 435.1           | 1.57           | 362.1           | 0.91         | 42.7            | 0.25           |
|      |                               | (21658624,25443226) |       | (280, 472) | (225.3, 621.9)  | (1.18, 2.00)   | (180.9, 523.4)  | (0.69, 1.16) | (-12.1, 92.0)   | (-0.83, 1.34)  |
| High | Slovenia                      | 2074271             | 5.2   | 364        | 512.1           | 17.53          | 481.7           | 6.77         | 159.9           | 1.94           |
|      |                               | (1914446,2243231)   |       | (262, 483) | (334.2, 752.6)  | (12.65, 23.28) | (312.6, 710.1)  | (4.92, 8.94) | (84.9, 258.1)   | (0.47, 3.43)   |
| High | Ireland                       | 4910357             | 36.4  | 239        | 101.5           | 4.86           | 47.8            | 3.04         | 0.3             | -1.28          |
|      |                               | (4483761,5355859)   |       | (200, 272) | (72.8, 129.5)   | (4.07, 5.54)   | (26.7, 68.3)    | (2.55, 3.47) | (-13.4, 13.5)   | (-2.45, -0.10) |
| High | Slovakia                      | 5437223             | 2.9   | 135        | 552.3           | 2.48           | 533.8           | 1.48         | 317.8           | 6.86           |
|      |                               | (4969934,5923604)   |       | (101, 172) | (244.8, 796.1)  | (1.87, 3.17)   | (235.0, 770.7)  | (1.12, 1.89) | (121.4, 471)    | (4.86, 8.90)   |
| High | Cyprus                        | 1313477             | 68.8  | 134        | 126.9           | 10.22          | 34.4            | 8.20         | -19.7           | -1.72          |
|      |                               | (1162096,1476217)   |       | (112, 158) | (74.6, 200.7)   | (8.54, 12.03)  | (3.4, 78.1)     | (6.86, 9.76) | (-39.0, 8.3)    | (-3.92, 0.53)  |
| High | Saudi Arabia                  | 35731972            | 122.7 | 98         | 238.3           | 0.27           | 51.9            | 0.65         | 13.2            | 0.42           |
|      |                               | (31175706,40192039) |       | (74, 133)  | (116.1, 529.9)  | (0.21, 0.37)   | (-2.9, 182.8)   | (0.48, 0.84) | (-25.2, 100.7)  | (-1.18, 2.04)  |
| High | Puerto Rico                   | 3521431             | -2.5  | 94         | 90.0            | 2.66           | 95.0            | 1.14         | -20.3           | -1.05          |
|      |                               | (3106914,3986032)   |       | (71, 119)  | (46.0, 144.9)   | (2.02, 3.37)   | (49.8, 151.3)   | (0.87, 1.45) | (-38.2, 3)      | (-2.56, 0.49)  |
| High | Estonia                       | 1312361             | -16.3 | 80         | 852.0           | 6.13           | 1038.0          | 2.57         | 496.7           | 7.59           |
|      |                               | (1204372,1415452)   |       | (59, 108)  | (558.1, 1396.4) | (4.50, 8.27)   | (686.6, 1688.7) | (1.89, 3.45) | (318.4, 835.8)  | (4.49, 10.79)  |
| High | Luxembourg                    | 618550              | 62.2  | 56         | 139.3           | 9.05           | 47.5            | 4.71         | 4.7             | -0.75          |



|      |             |                    |       |          |                 |               |              |              |               |                 |
|------|-------------|--------------------|-------|----------|-----------------|---------------|--------------|--------------|---------------|-----------------|
|      |             | (568118,666377)    |       | (45, 67) | (94.6, 186.5)   | (7.20, 10.77) | (20.0, 76.6) | (3.78, 5.57) | (-13.7, 24.1) | (-3.61, 2.19)   |
| High | United Arab | 9241704            |       | 52       | 707.6           | 0.56          | 63.6         | 0.95         | -21.1         | -1.18           |
|      | Emirates    | (7764642,10592699) | 393.7 | (27, 80) | (415.7, 1190.0) | (0.29, 0.86)  | (4.5, 161.3) | (0.52, 1.47) | (-44.6, 9.8)  | (-12.66, 11.82) |

There were 99 countries with at least 50 deaths.

CAVD, calcific aortic valve disease; 95% UI, 95% uncertainty intervals; 95% CI, 95% confidence interval; SDI, Socio-demographic Index; APC, age-period-cohort.

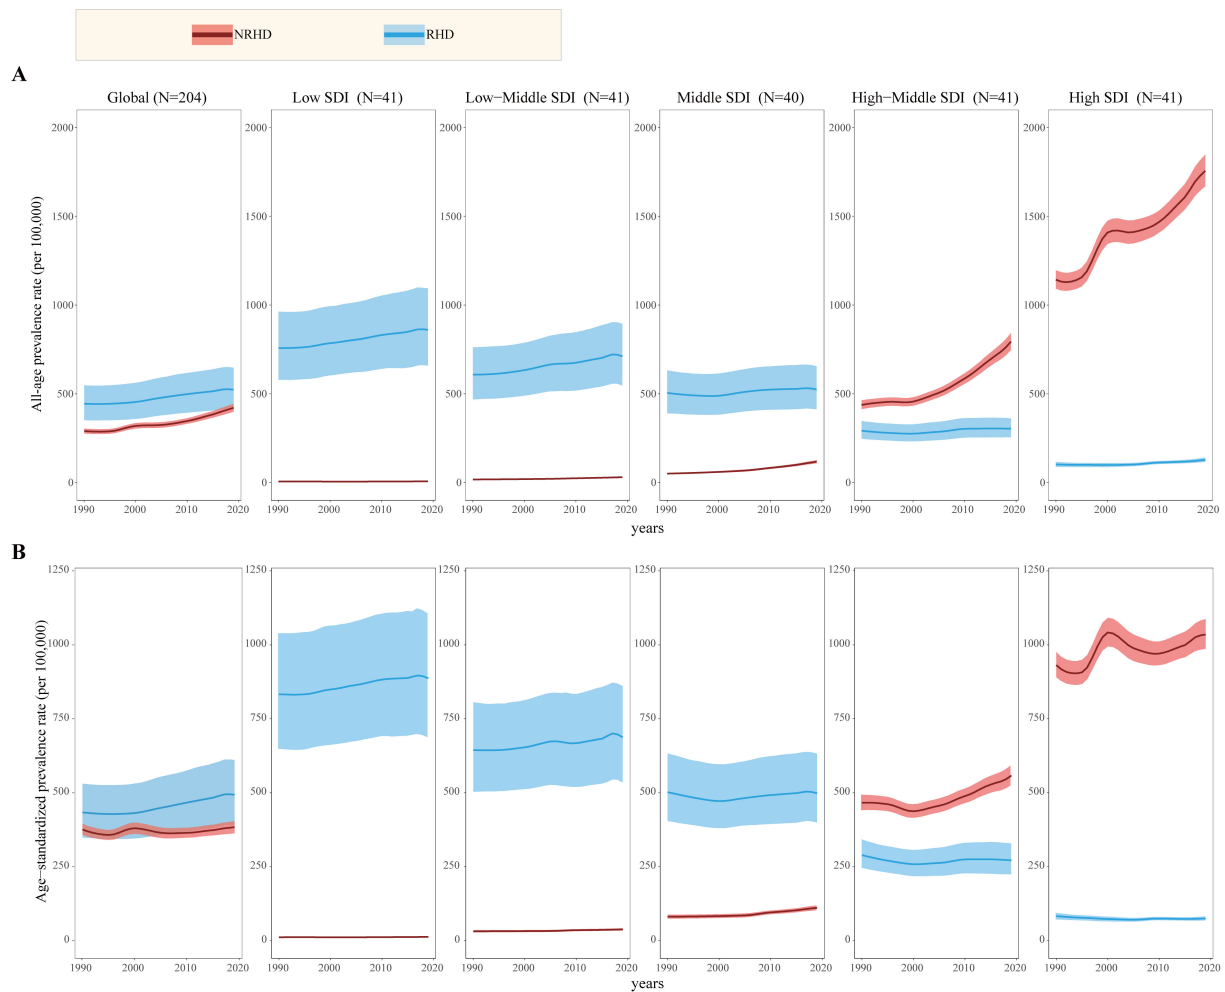

**Figure S1. Changes in all-age prevalence rate (A) and age-standardized prevalence rate (B) of RHD and NRHD by SDI quintiles, 1990 to 2019.** RHD have been prevalent in low, low-middle, and middle SDI regions in the past 30 years. In comparison, NRHD showed an increasingly high all-age/age-standardized prevalence rate in high and high-middle SDI regions. The shaded areas show the 95% confidence intervals. NRHD, non-rheumatic heart diseases; RHD, rheumatic heart diseases; SDI, Socio-demographic Index.

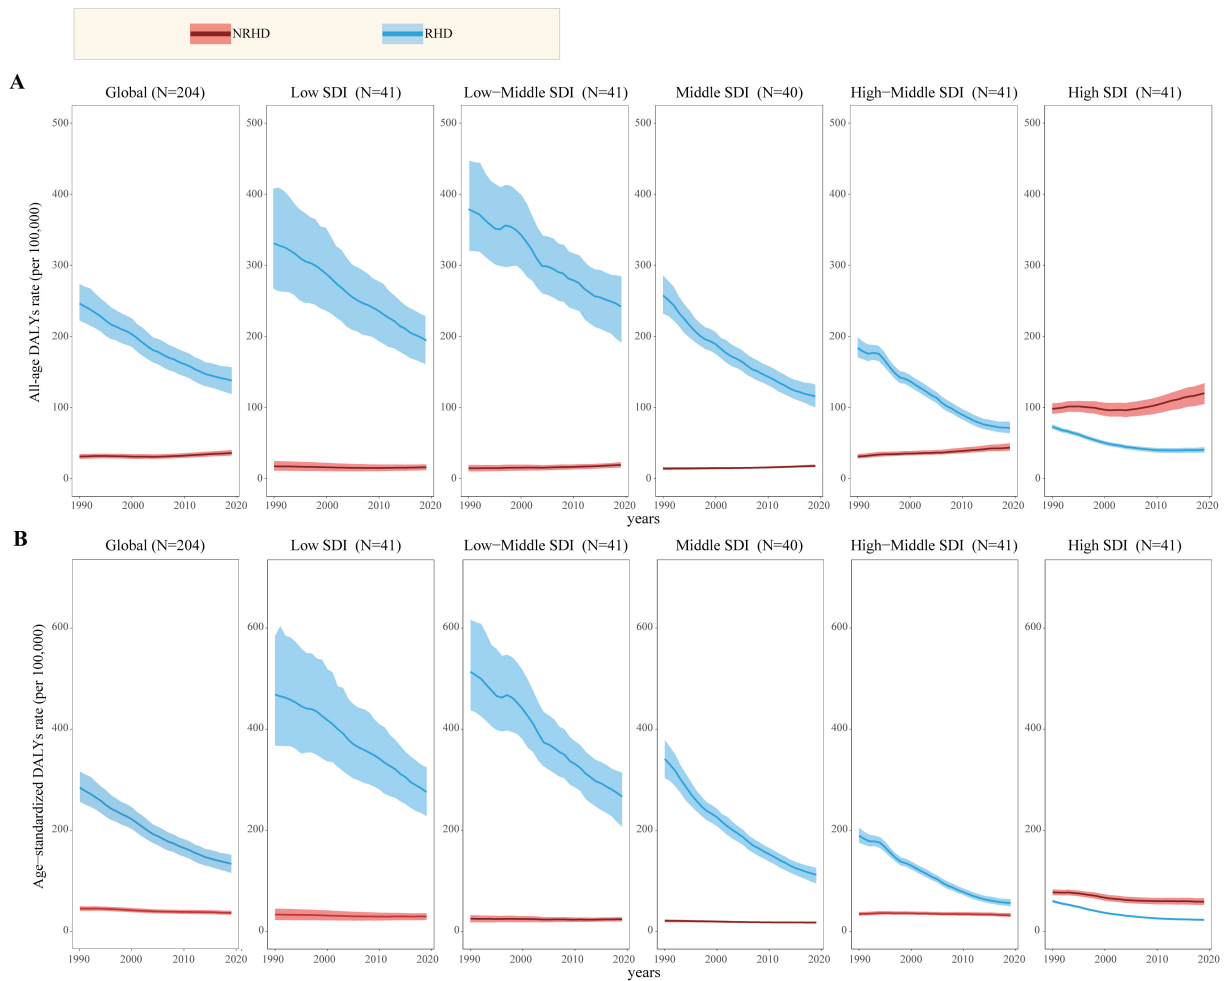

**Figure S2. Changes in all-age DALYs rate (A) and age-standardized DALYs rate (B) of RHD and NRHD by SDI quintiles, 1990 to 2019.** The DALYs rates of RHD decreased dramatically in the past 30 years, with a decline of 44.0% (95% UI 36.2 to 52.0) and 53.1% (95% UI 46.4 to 60.0) in the all-age and age-standardized DALYs rates, respectively. The shaded areas show the 95% confidence intervals. NRHD, non-rheumatic heart diseases; RHD, rheumatic heart diseases; SDI, Socio-demographic Index; UI, uncertainty interval.

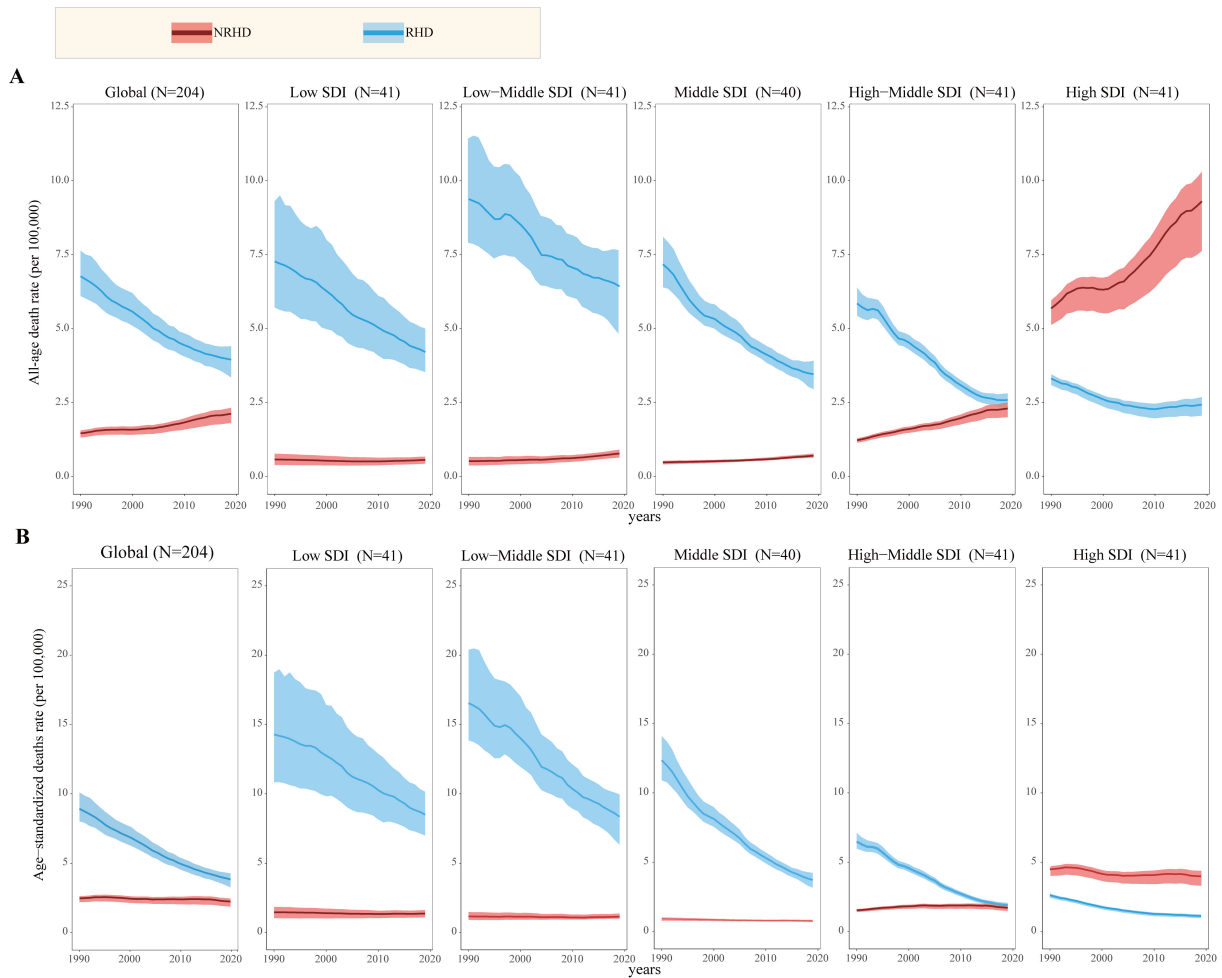

**Figure S3. Changes in all-age death rate (A) and age-standardized death rate (B) of RHD and NRHD by SDI quintiles, 1990 to 2019.** The death rates of RHD decreased dramatically in the past 30 years, with a decline of 41.6% (95% UI, 32.3 to 51.9) and 56.9% (95% UI 49.8 to 64.7) in the all-age and age-standardized death rates, respectively. The shaded areas show the 95% confidence intervals. NRHD, non-rheumatic heart diseases; RHD, rheumatic heart diseases; SDI, Socio-demographic Index; UI, uncertainty interval.

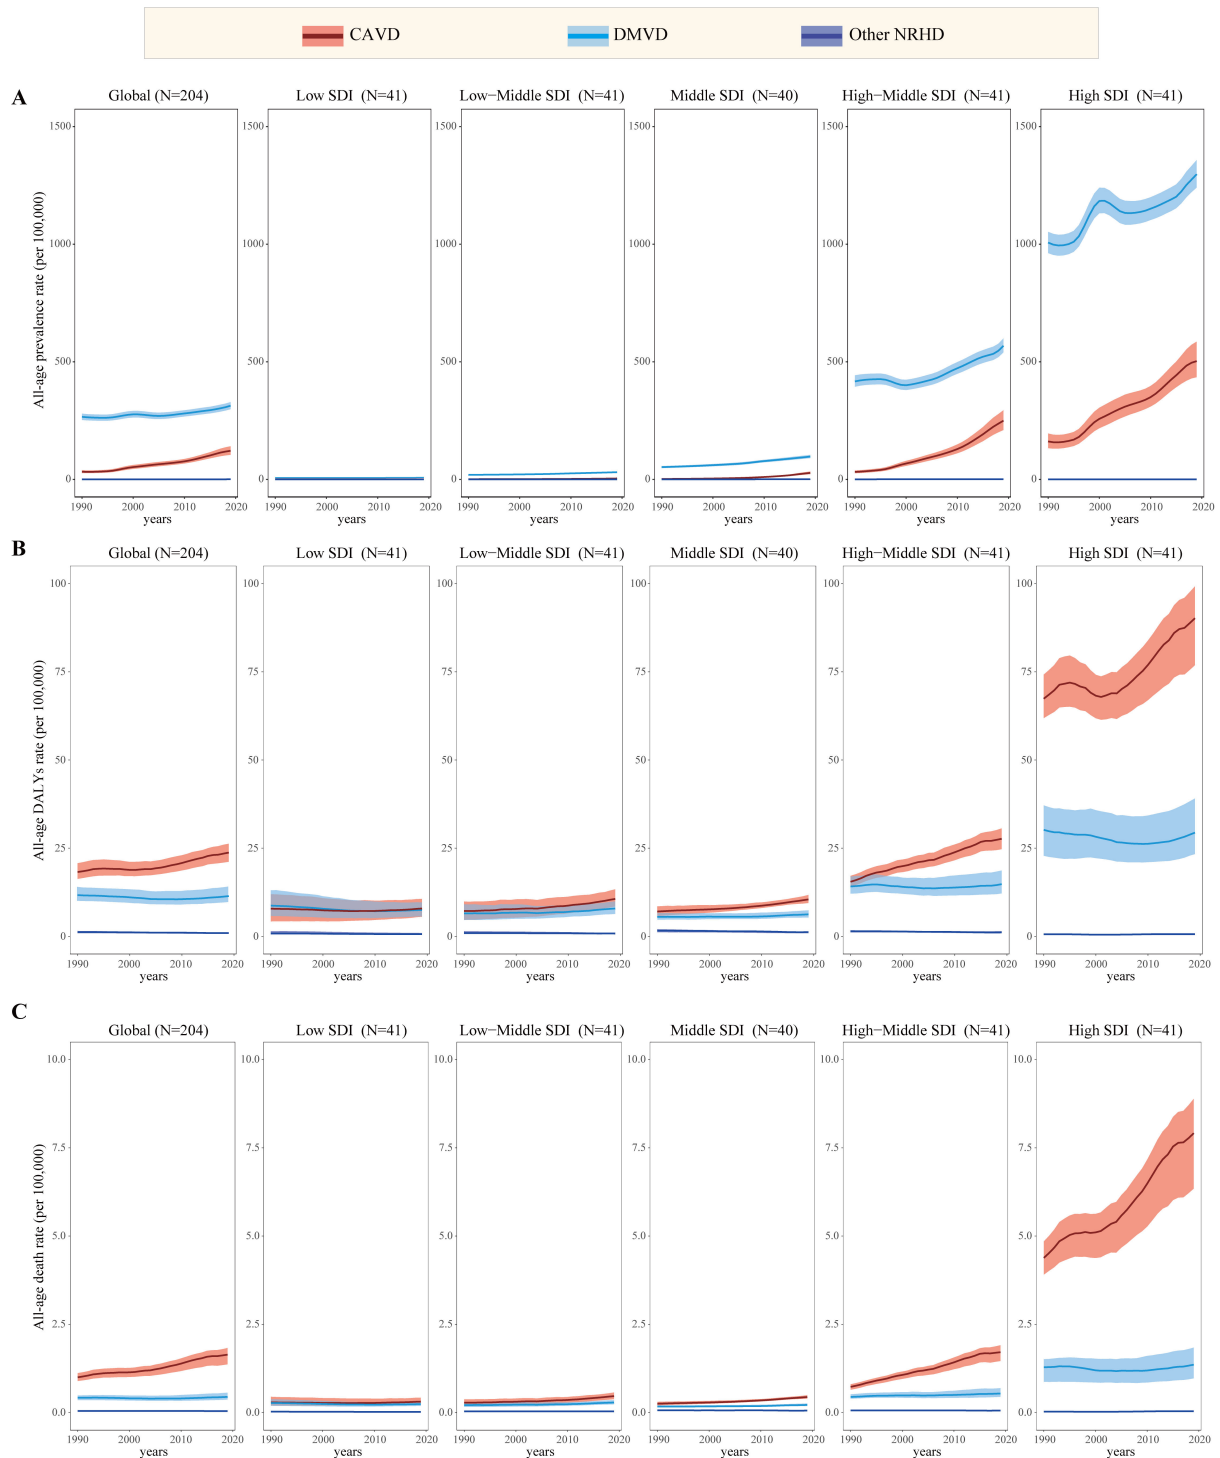

**Figure S4. Changes in all-age prevalence rate (A), DALYs rate (B), and death rate (C) of three forms of NRHD by SDI quintiles, 1990 to 2019.** For the all-age rates, although both DMVD and CAVD were increasingly prevalent, CAVD exhibited an obvious increase in DALYs and deaths, while DMVD was well controlled. The shaded areas show the 95% confidence intervals. CAVD, calcified aortic valve disease; DMVD, degenerative mitral valve disease; NRHD, non- rheumatic heart diseases; SDI, Socio-demographic Index.

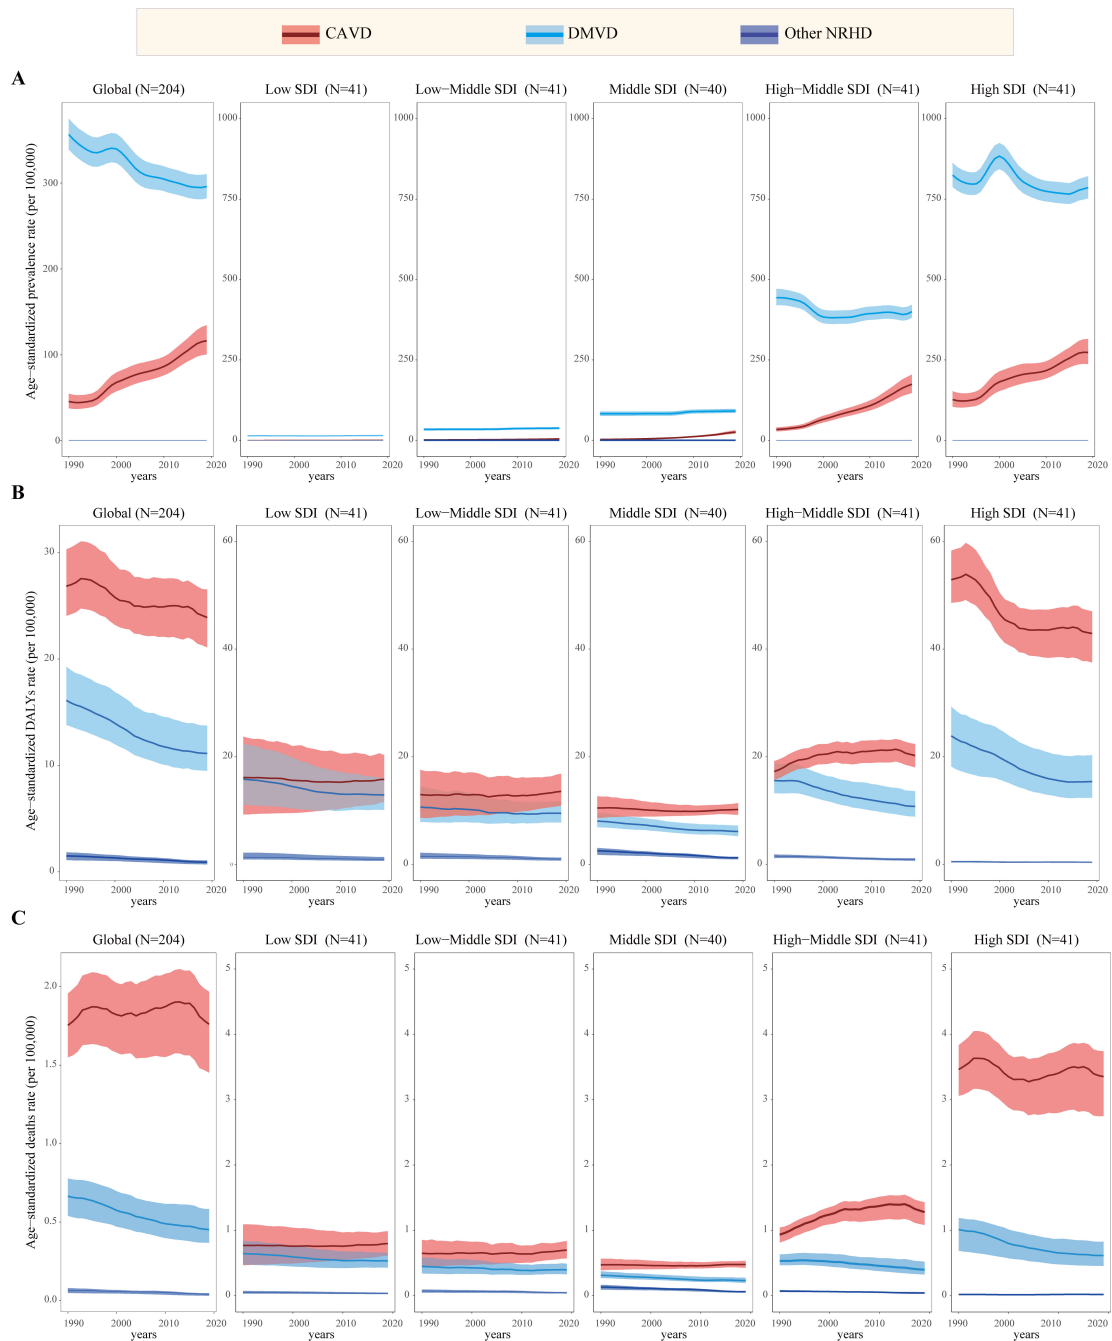

**Figure S5. Changes in age-standardized prevalence rate (A), DALYs rate (B), and death rate (C) of three forms of non-rheumatic heart disease by SDI quintiles, 1990 to 2019.** For the age-standardized rates, DMVD showed a decreasing trend in prevalence, DALYs, and death rates globally and in nearly all SDI regions. In contrast, CAVD exhibited an increased prevalence rate and not well-controlled DALYs and death rates globally and in most SDI regions, especially in high-middle and high SDI regions. The shaded areas show the 95% confidence intervals. CAVD, calcific aortic valve disease; DMVD, degenerative mitral valvular disease; SDI, Socio-demographic Index.

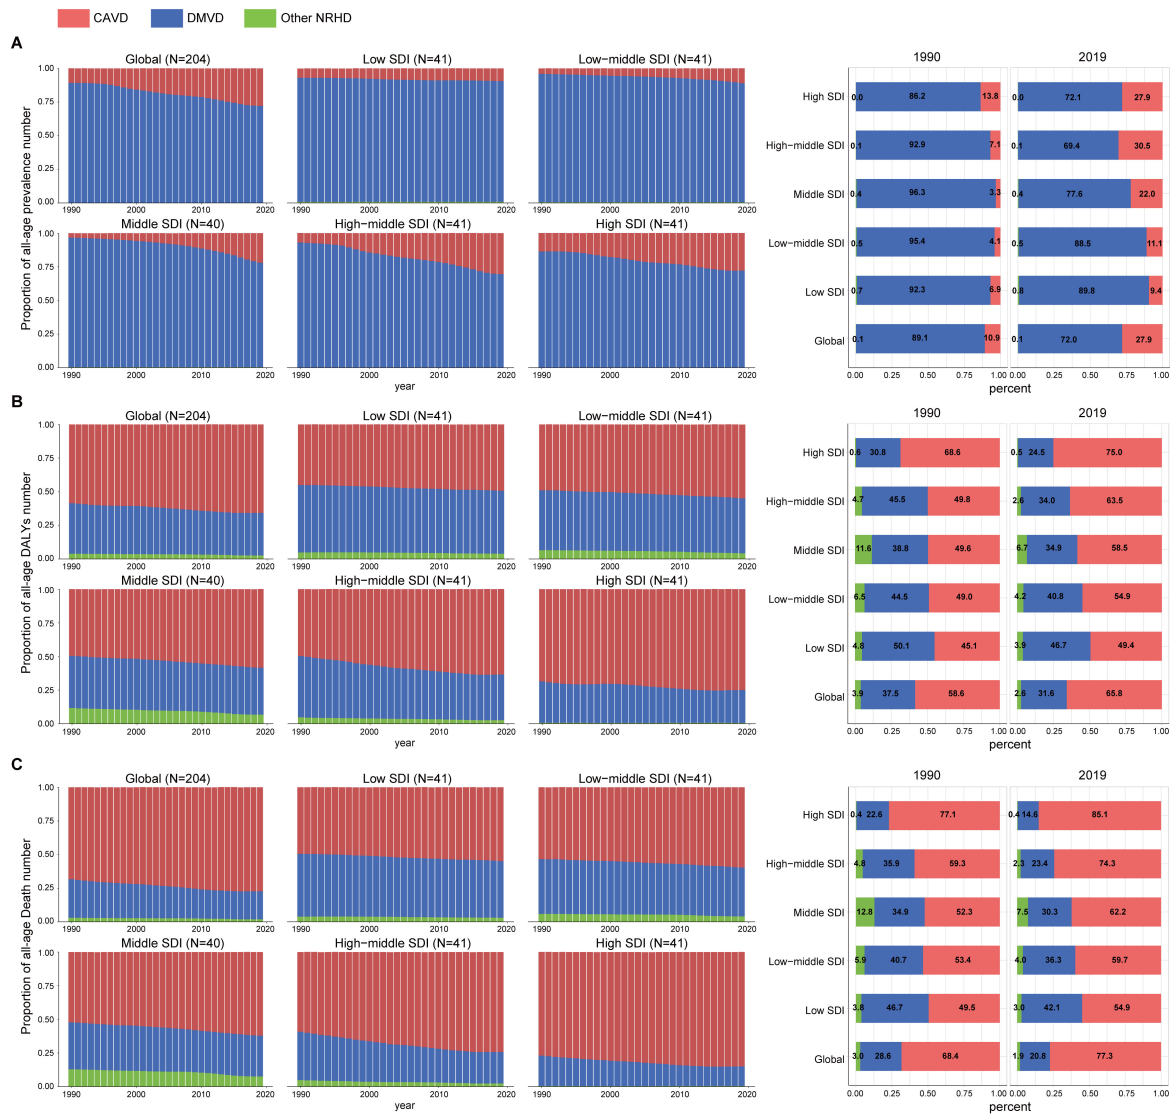

**Figure S6. Relative proportion of three forms in prevalence rate (A), DALYs rate (B), and death rate (C) by SDI quintiles of NRHD, 1990 to 2019. (A)** Although CAVD accounts for a lower prevalence percentage than DMVD, it showed an increasing tendency, from 11.3% in 1990 to 28.2% in 2019 on the global scale. **(B, C)** CAVD accounted for a higher percentage of DALYs and death numbers than DMVD, and the gap tended to increase further globally and in each SDI region. CAVD, calcified aortic valve disease; DMVD, degenerative mitral valve disease; NRHD, non- rheumatic heart diseases; SDI, Socio-demographic Index.

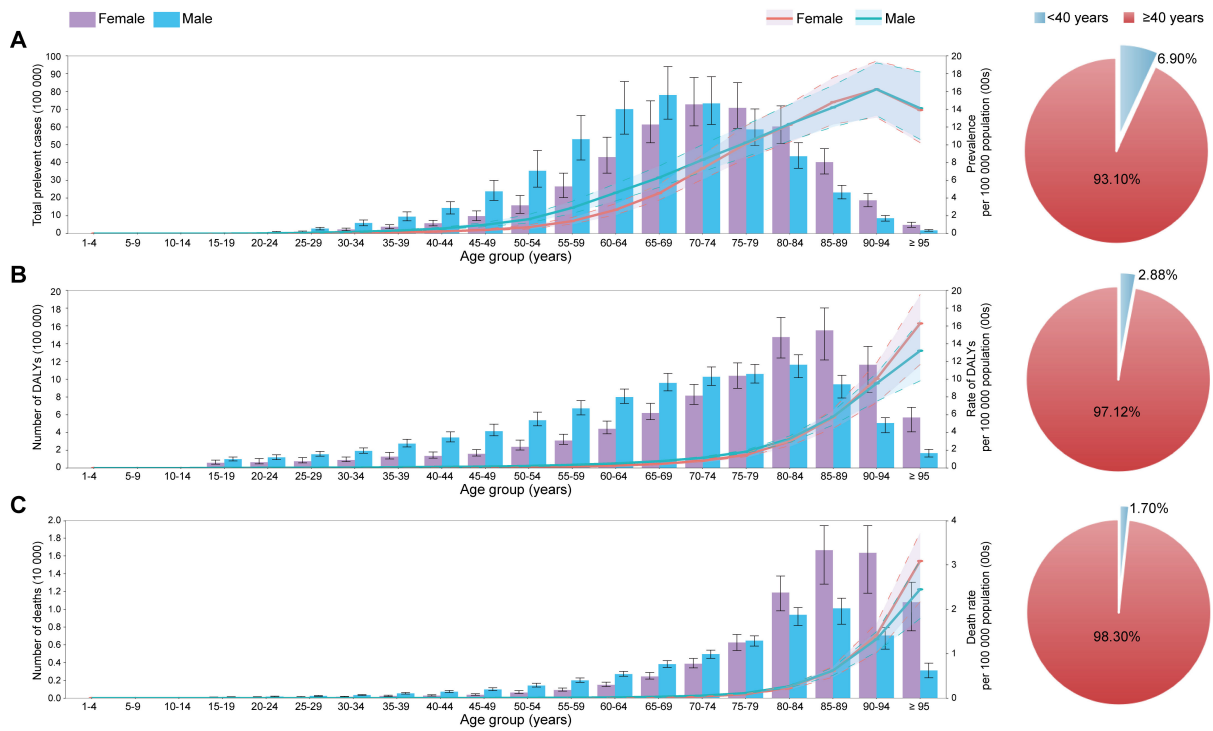

**Figure S7. Number and rate of prevalence (A), DALYs (B), and death (C) of CAVD by age and sex in 2019 globally.** The left panels show the numbers (bars with 95% uncertainty intervals) and rates (lines with 95% uncertainty intervals), and the right panel show the proportions for two age groups (<40 years and  $\geq$ 40 years). CAVD, calcific aortic valve disease.



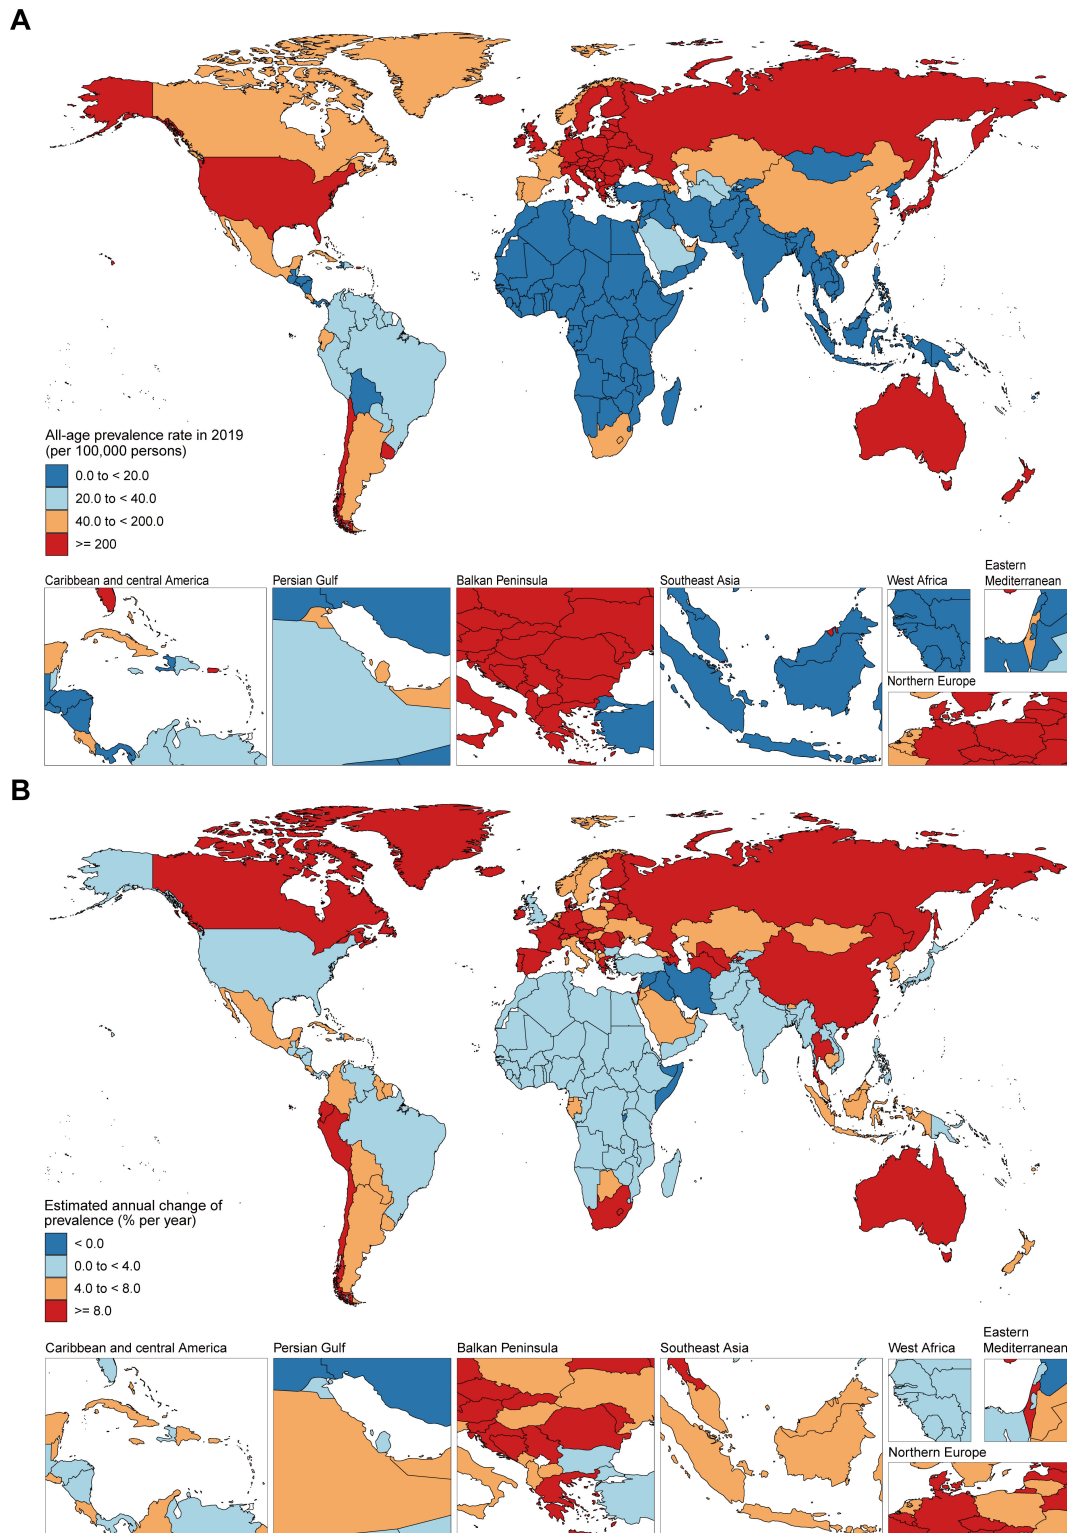

**Figure S8. All-age prevalence rate in 2019 (A) and net drift of prevalence rate during 1990–2019 (B) for CAVD in 204 countries and territories. CAVD, calcific aortic valve disease.**

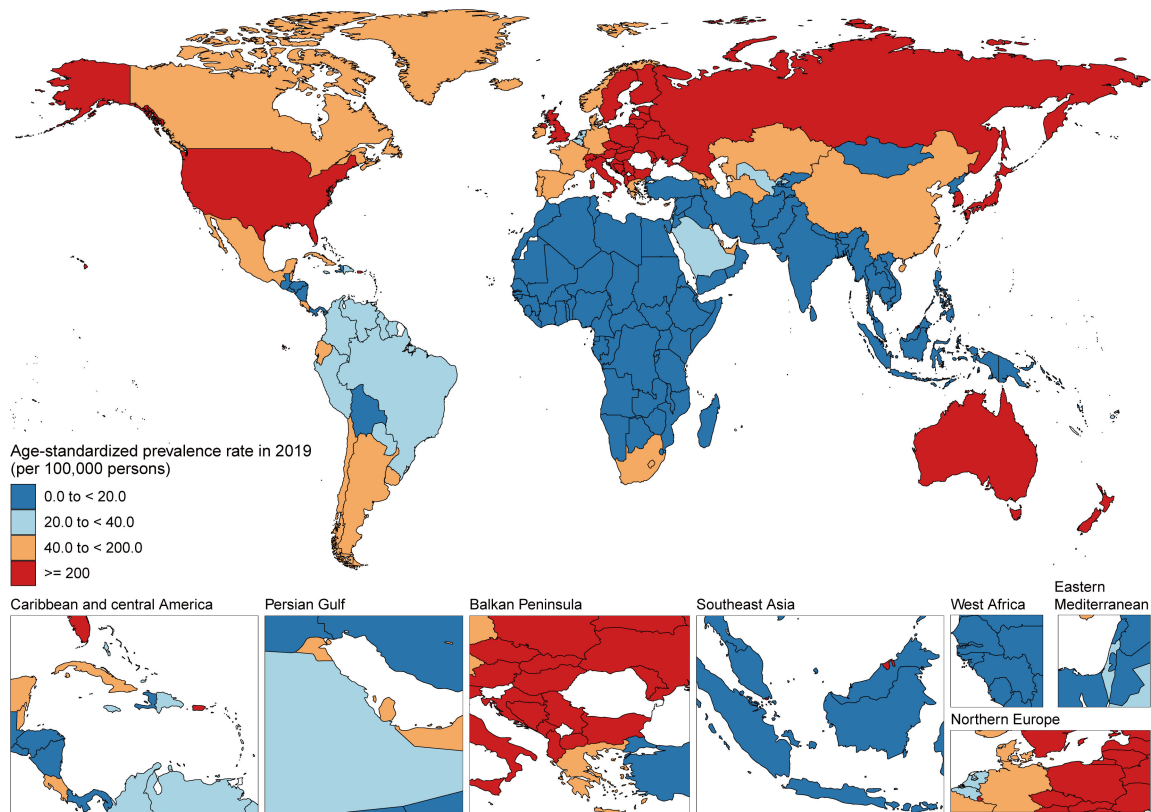

**Figure S9. The age-standardized prevalence rate in 2019 for CAVD in 204 countries and territories. CAVD, calcific aortic valve disease.**

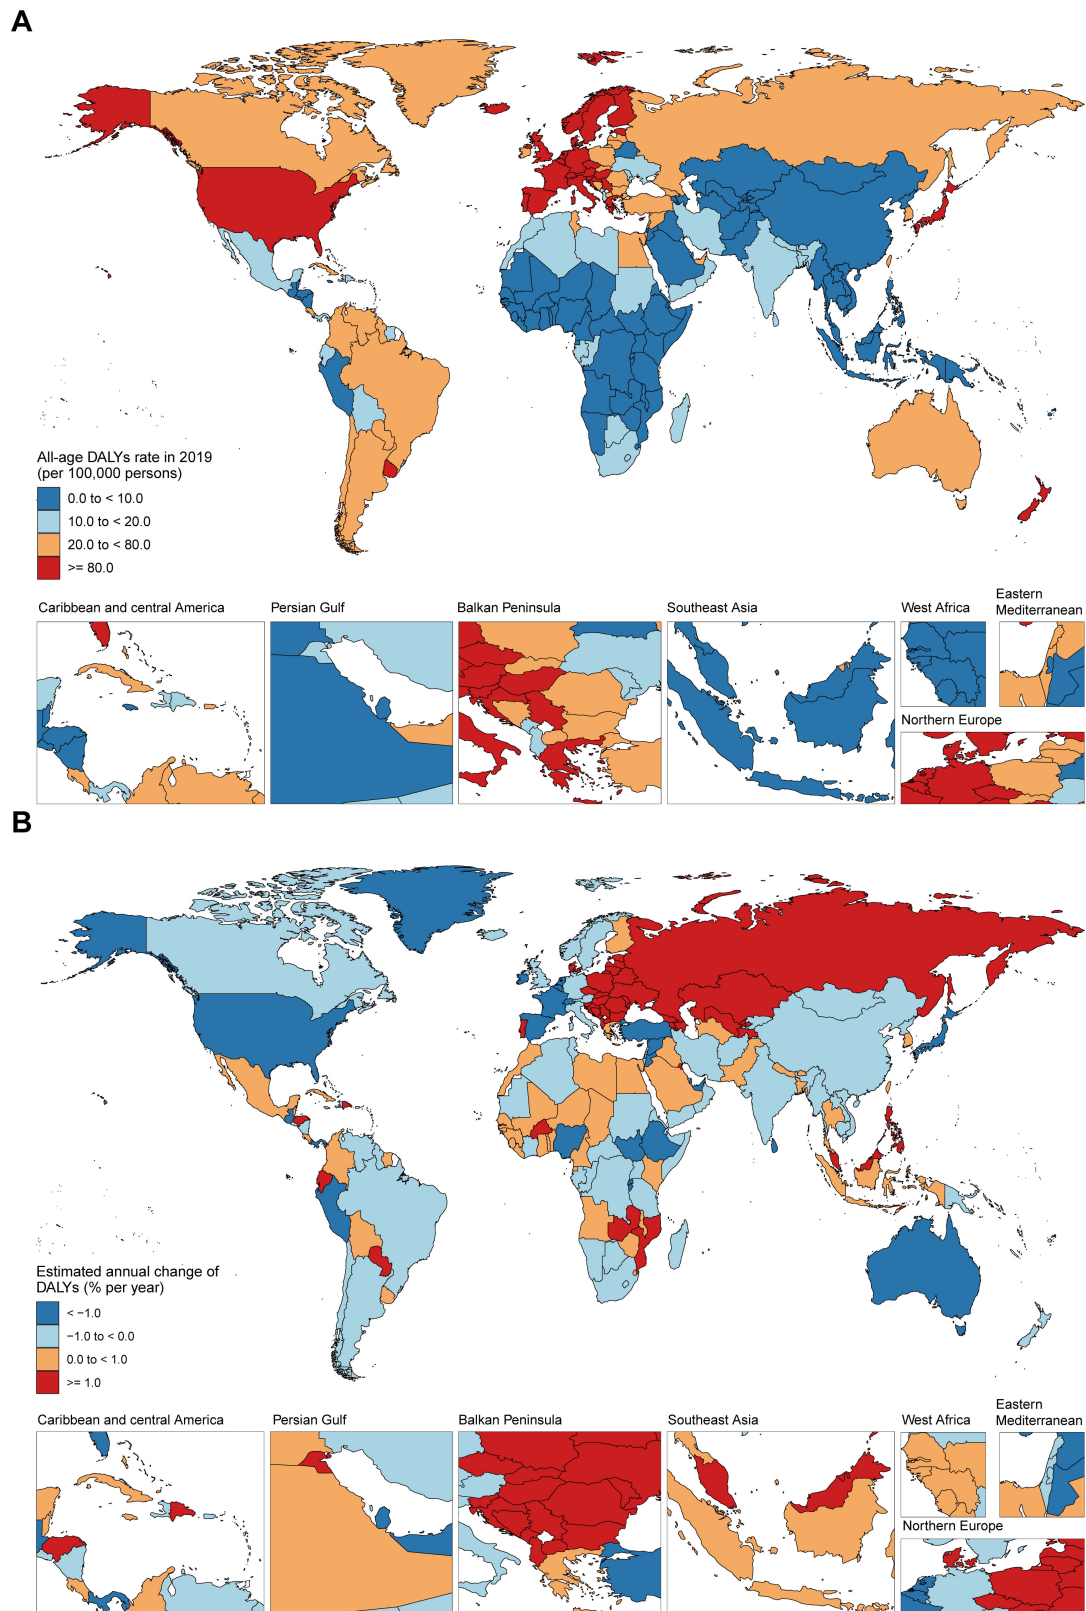

**Figure S10. All-age DALYs rate in 2019 (A) and net drift of DALYs rate during 1990–2019 (B) for CAVD in 204 countries and territories. CAVD, calcific aortic valve disease.**

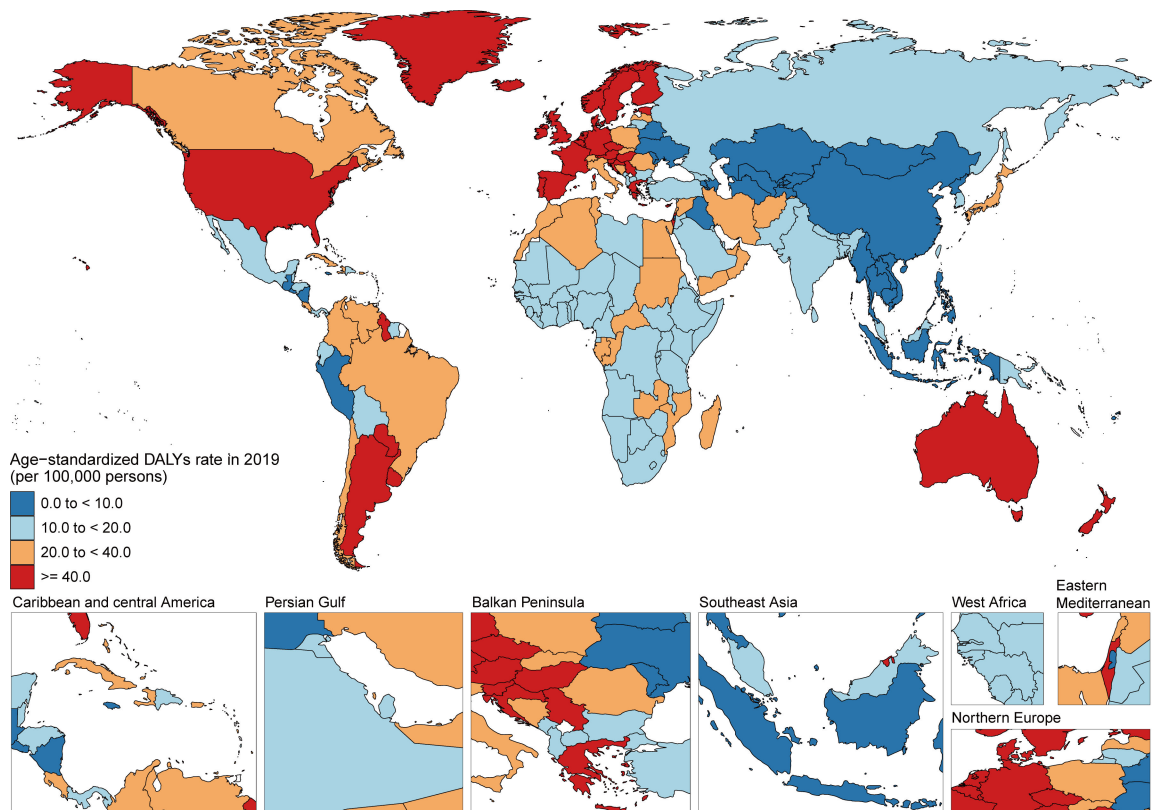

**Figure S11. The age-standardized DALYs rate in 2019 for CAVD in 204 countries and territories. CAVD, calcific aortic valve disease.**

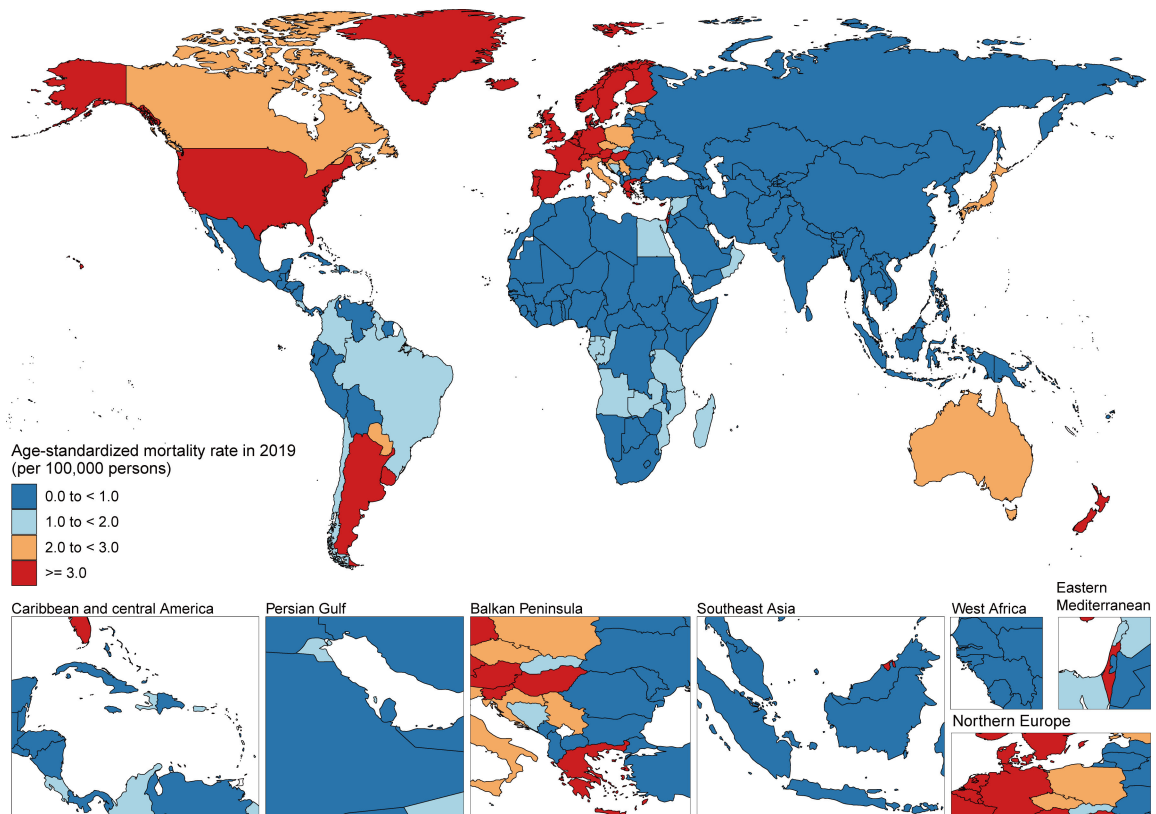

**Figure S12. The age-standardized death rate in 2019 for CAVD in 204 countries and territories. CAVD, calcific aortic valve disease.**

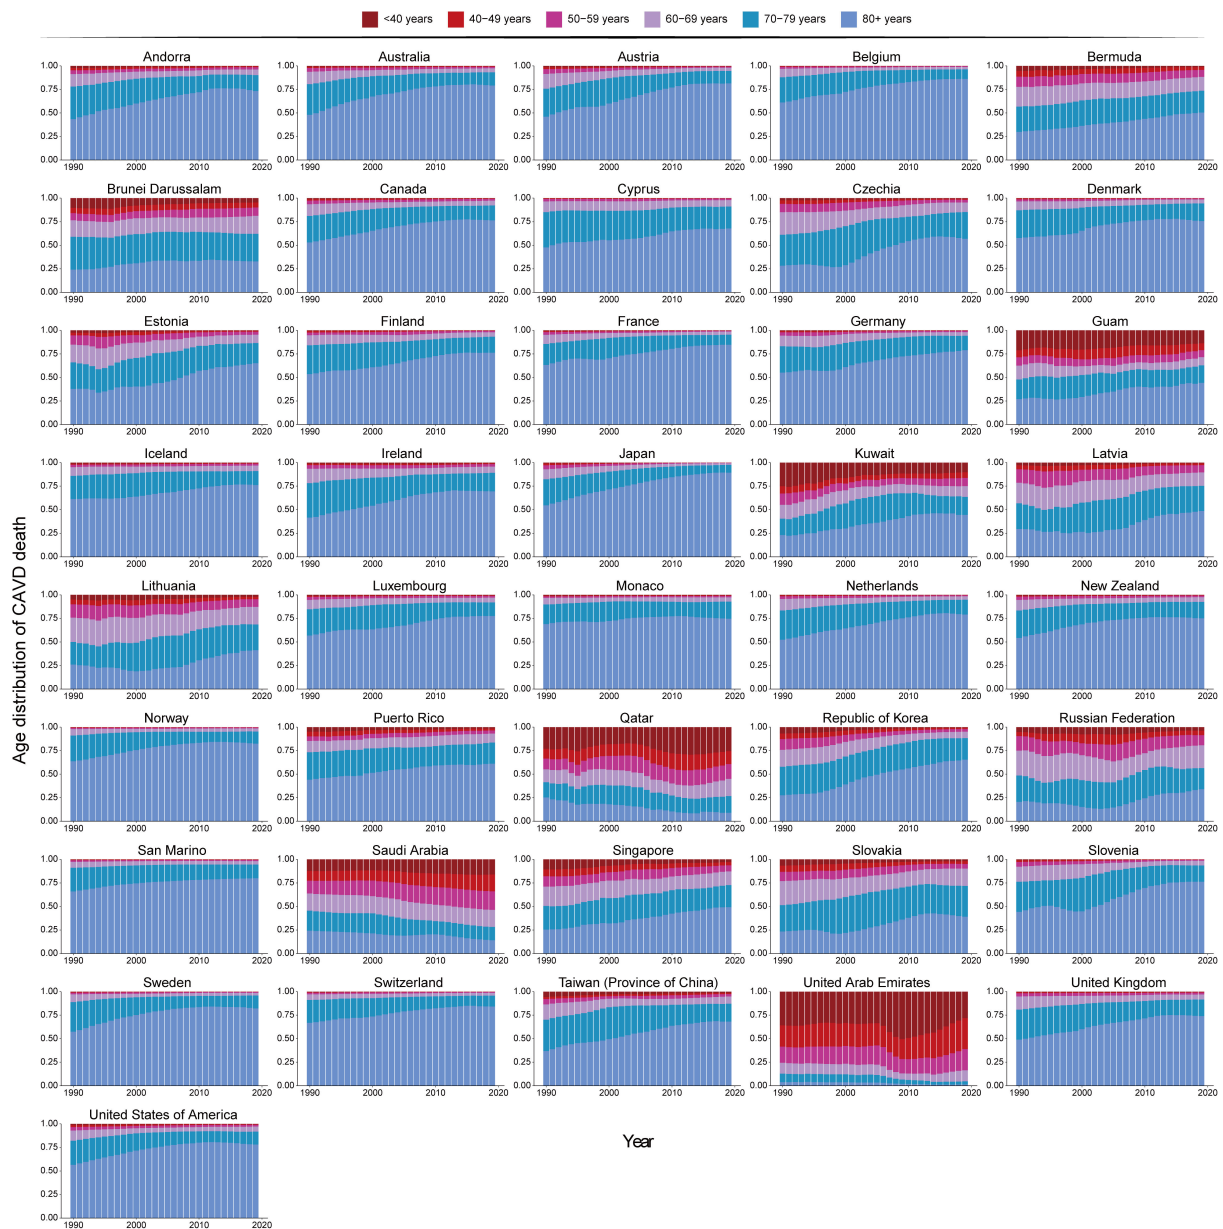

**Figure S13. Age distribution of deaths from CAVD in high SDI countries, 1990-2019.**  
CAVD, calcific aortic valve disease; SDI, Socio-demographic Index.

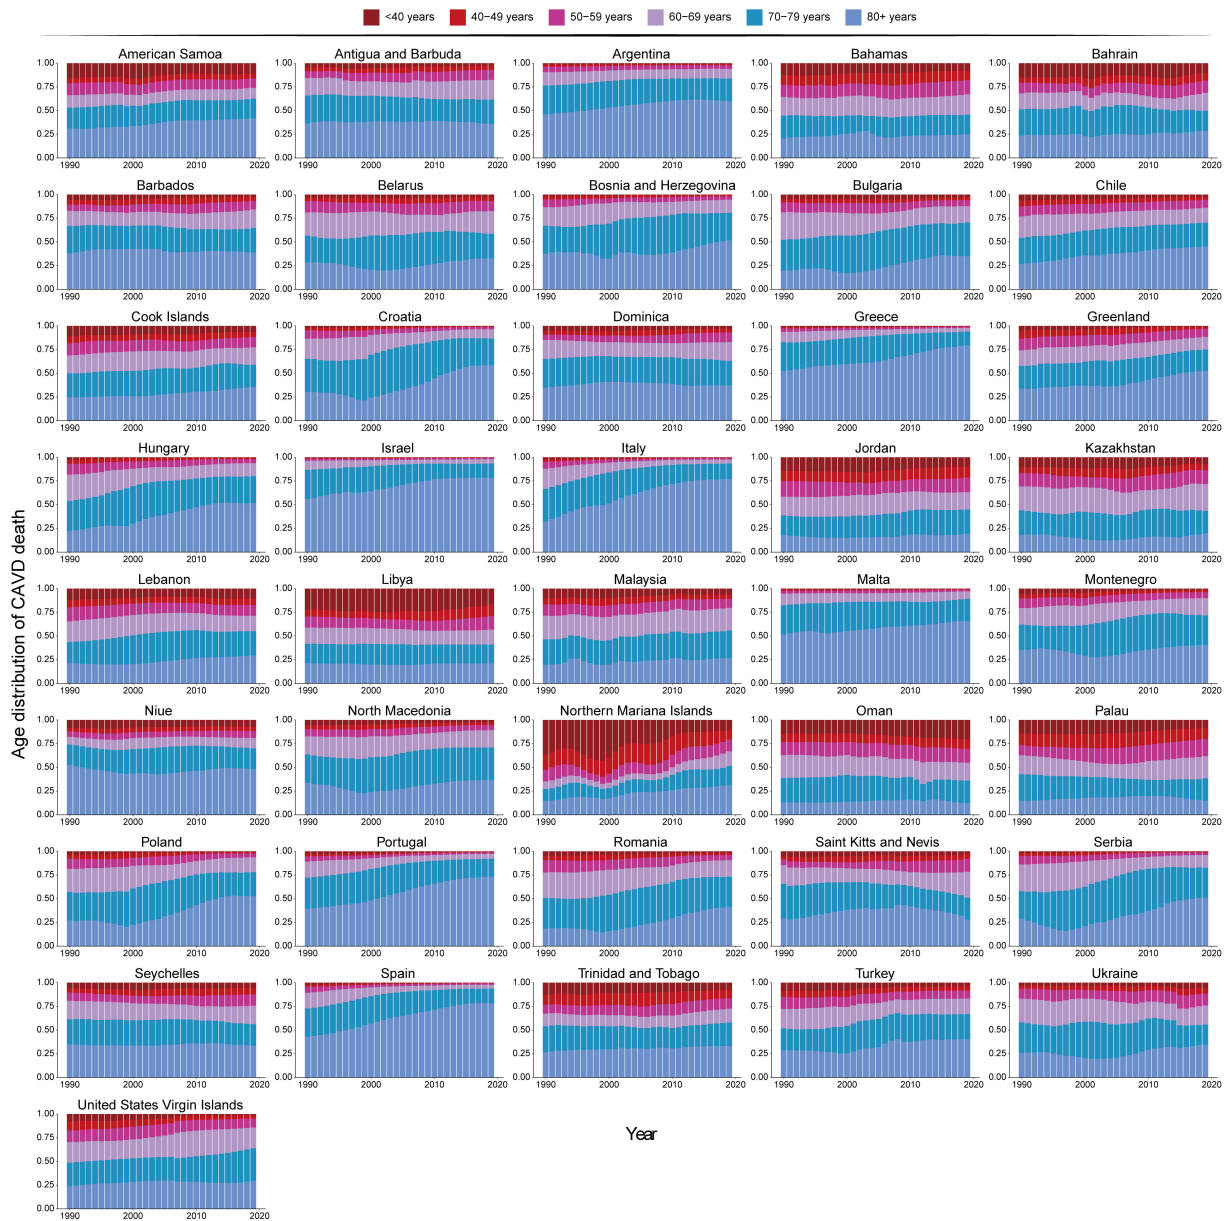

**Figure S14. Age distribution of deaths from CAVD in high-middle SDI countries, 1990-2019. CAVD, calcific aortic valve disease; SDI, Socio-demographic Index.**

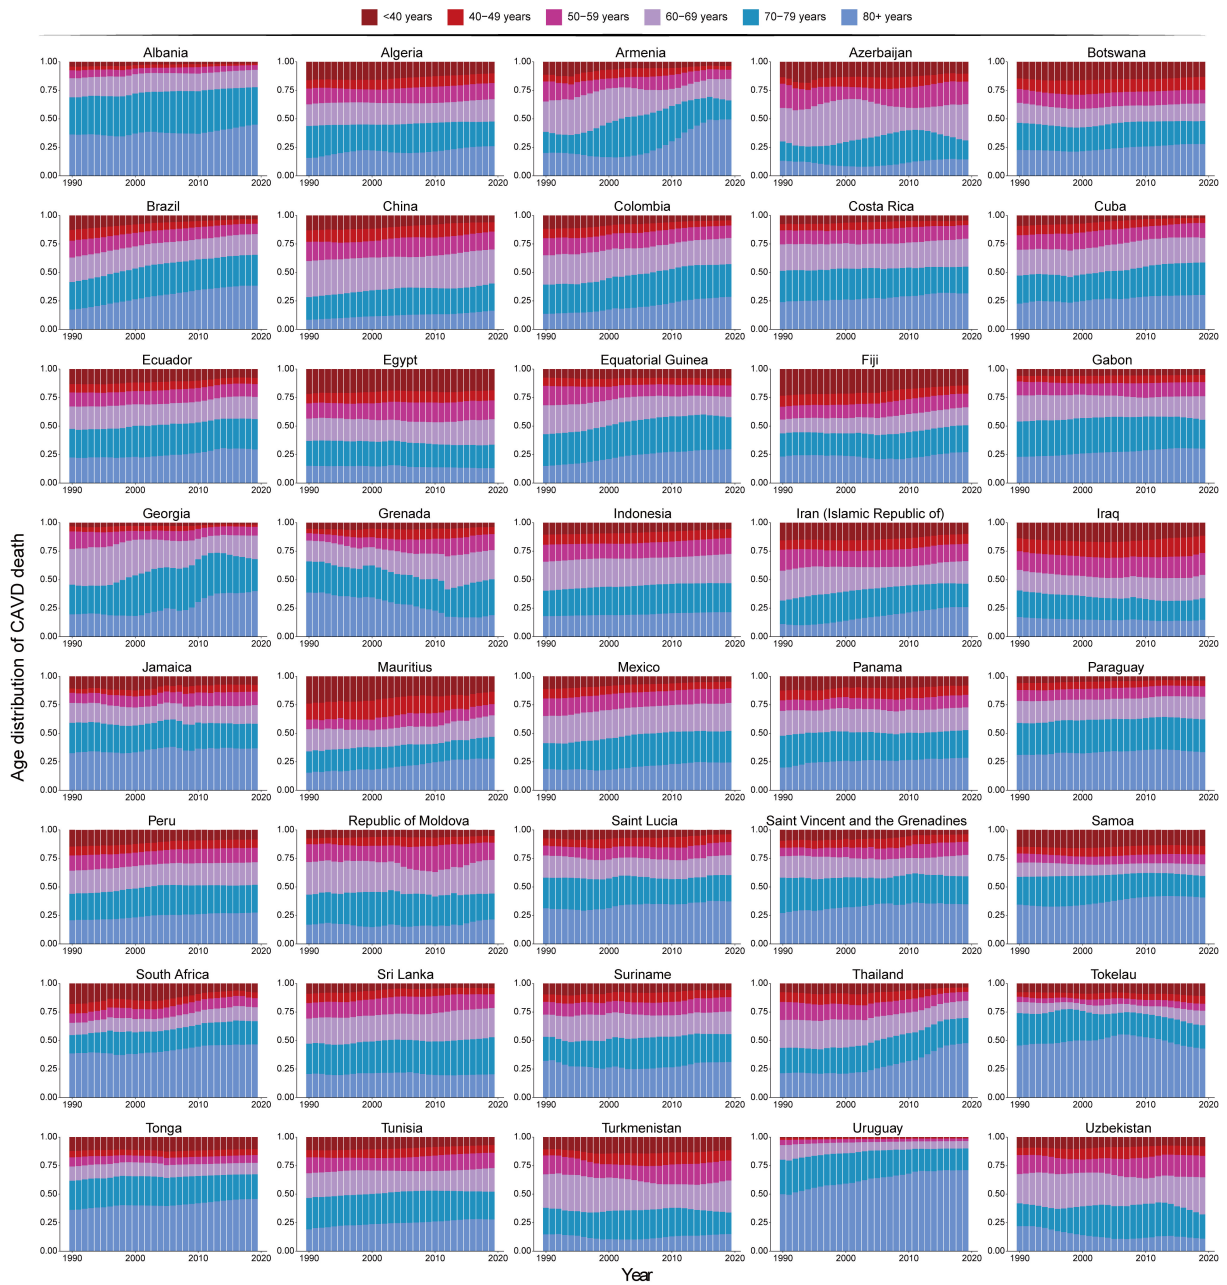

**Figure S15. Age distribution of deaths from CAVD in middle SDI countries, 1990-2019.**

CAVD, calcific aortic valve disease; SDI, Socio-demographic Index.



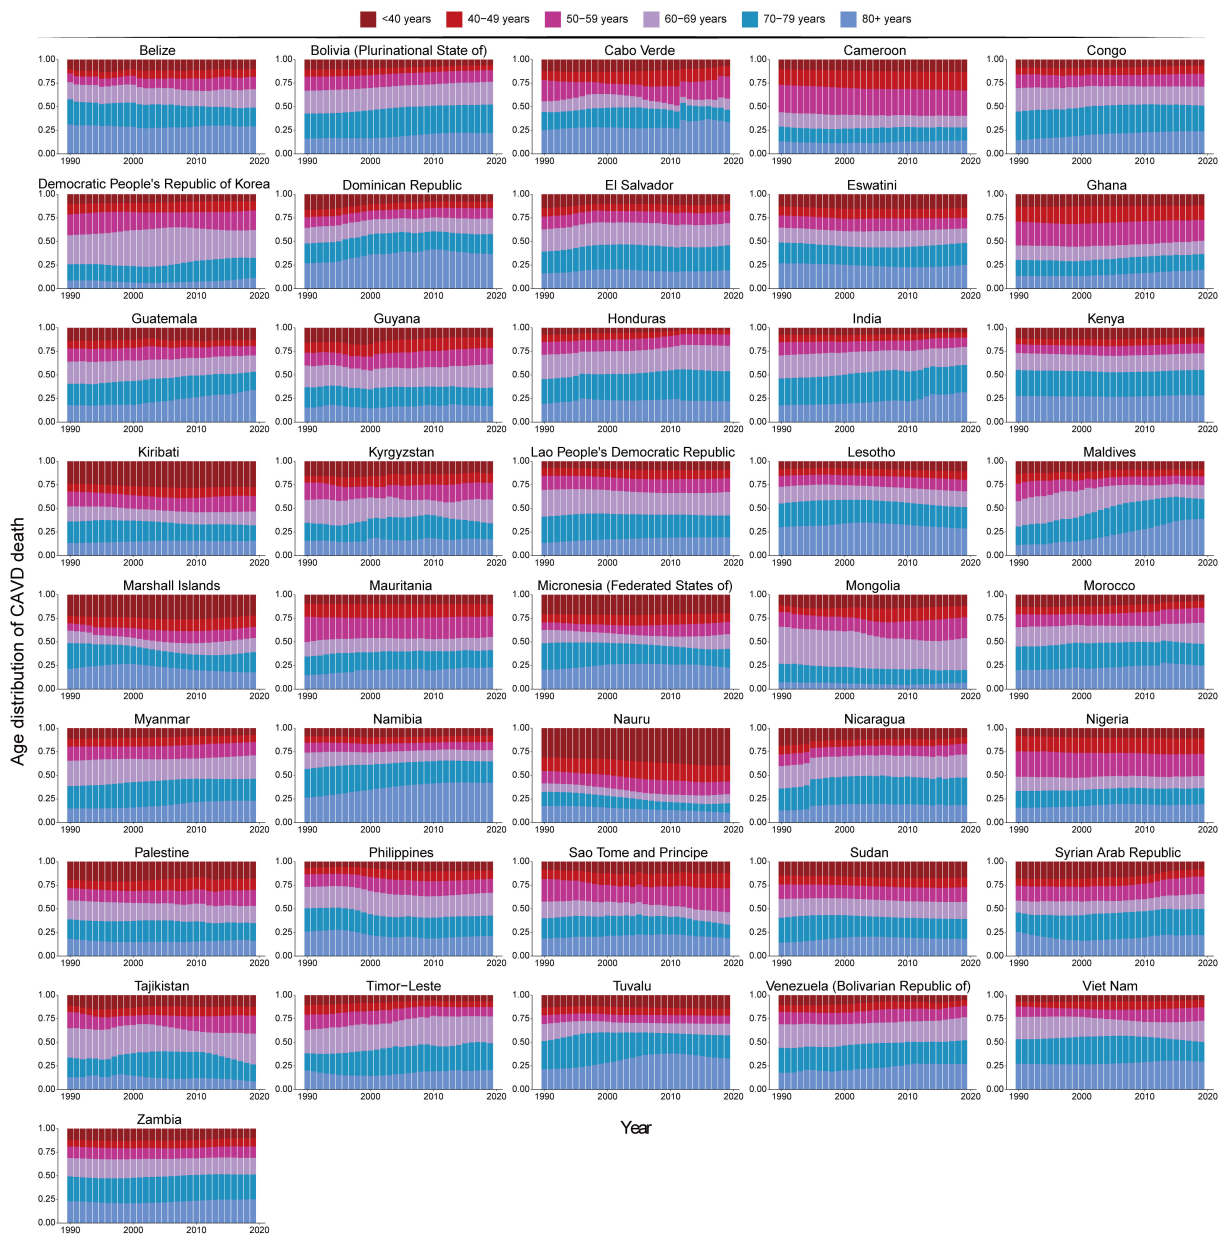

**Figure S16. Age distribution of deaths from CAVD in low-middle SDI countries, 1990-2019.** CAVD, calcific aortic valve disease; SDI, Socio-demographic Index.

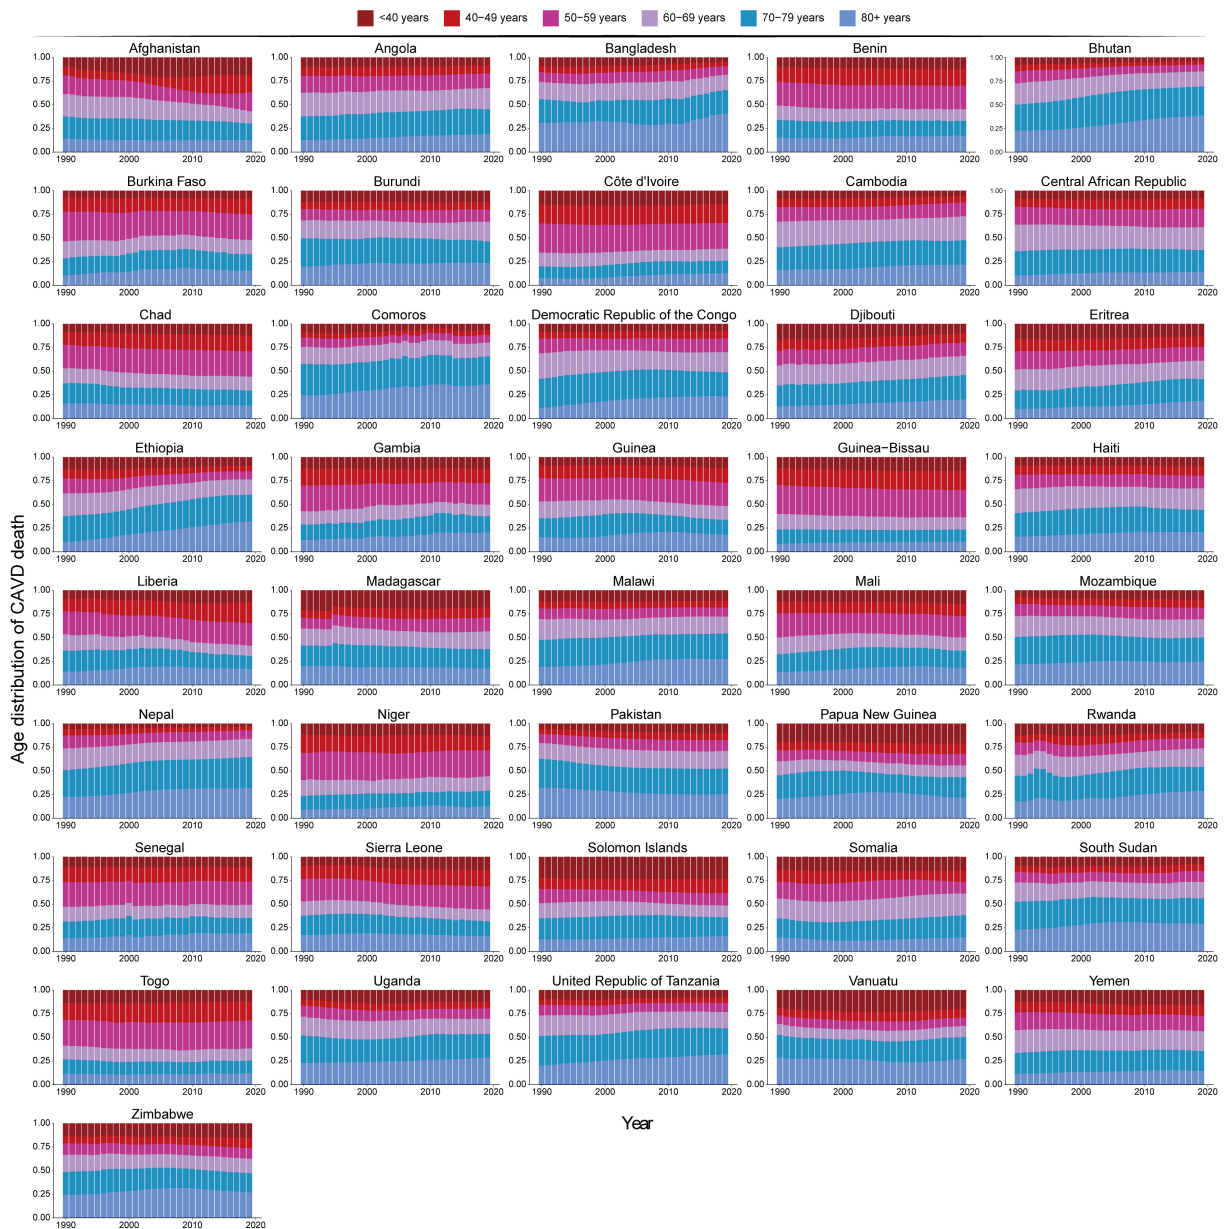

**Figure S17. Age distribution of deaths from CAVD in low SDI countries, 1990-2019. CAVD, calcific aortic valve disease; SDI, Socio-demographic Index.**

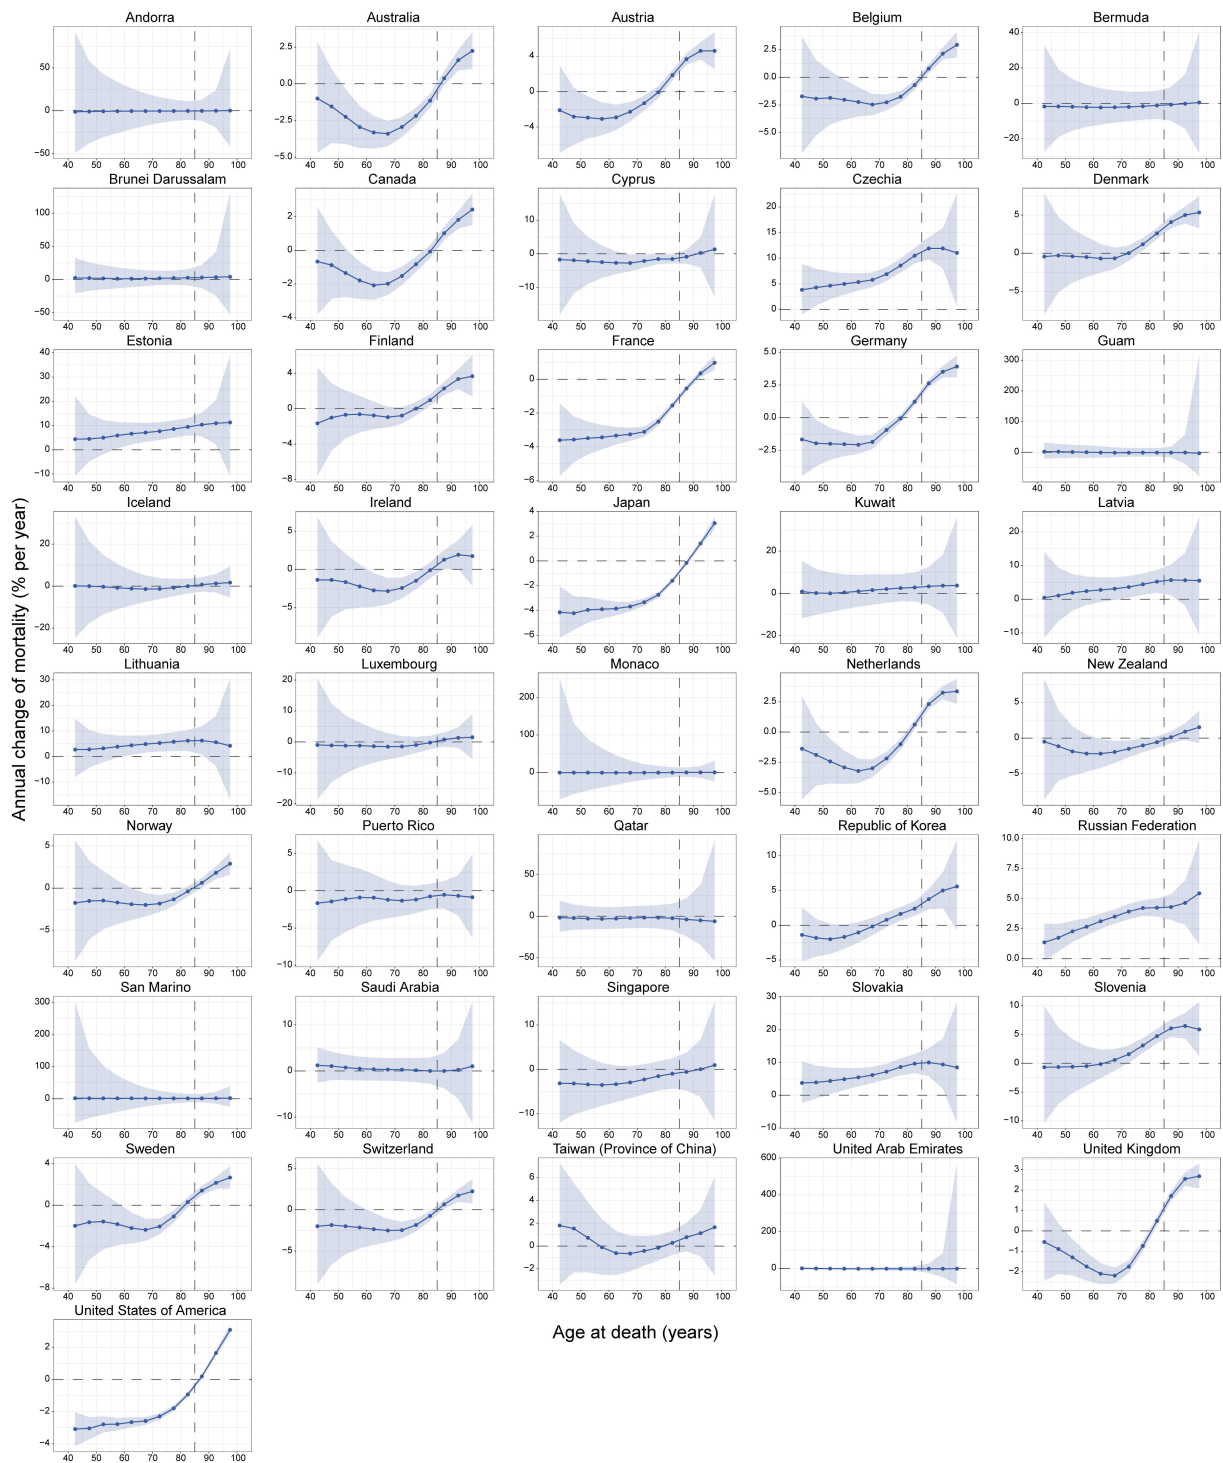

**Figure S18. The local drifts of CAVD mortality in high SDI countries, 1990-2019. CAVD, calcific aortic valve disease; SDI, Socio-demographic Index.**

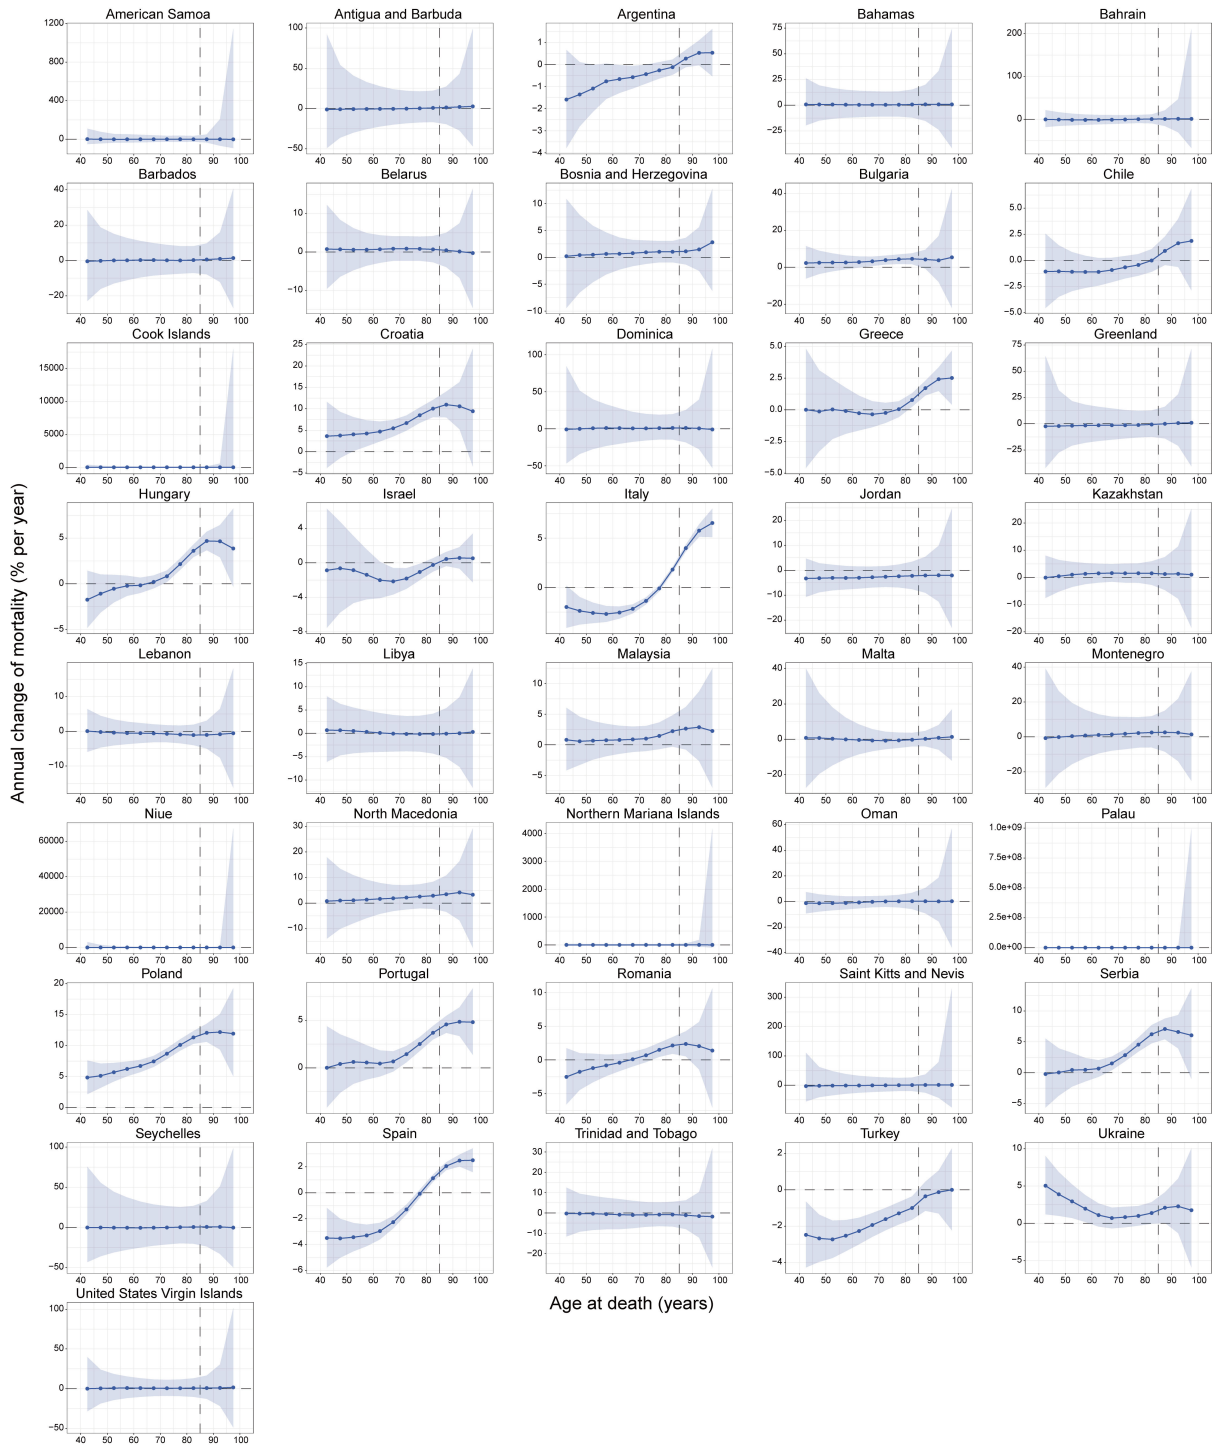

**Figure S19. The local drifts of CAVD mortality in high-middle SDI countries, 1990-2019.**  
 CAVD, calcific aortic valve disease; SDI, Socio-demographic Index.

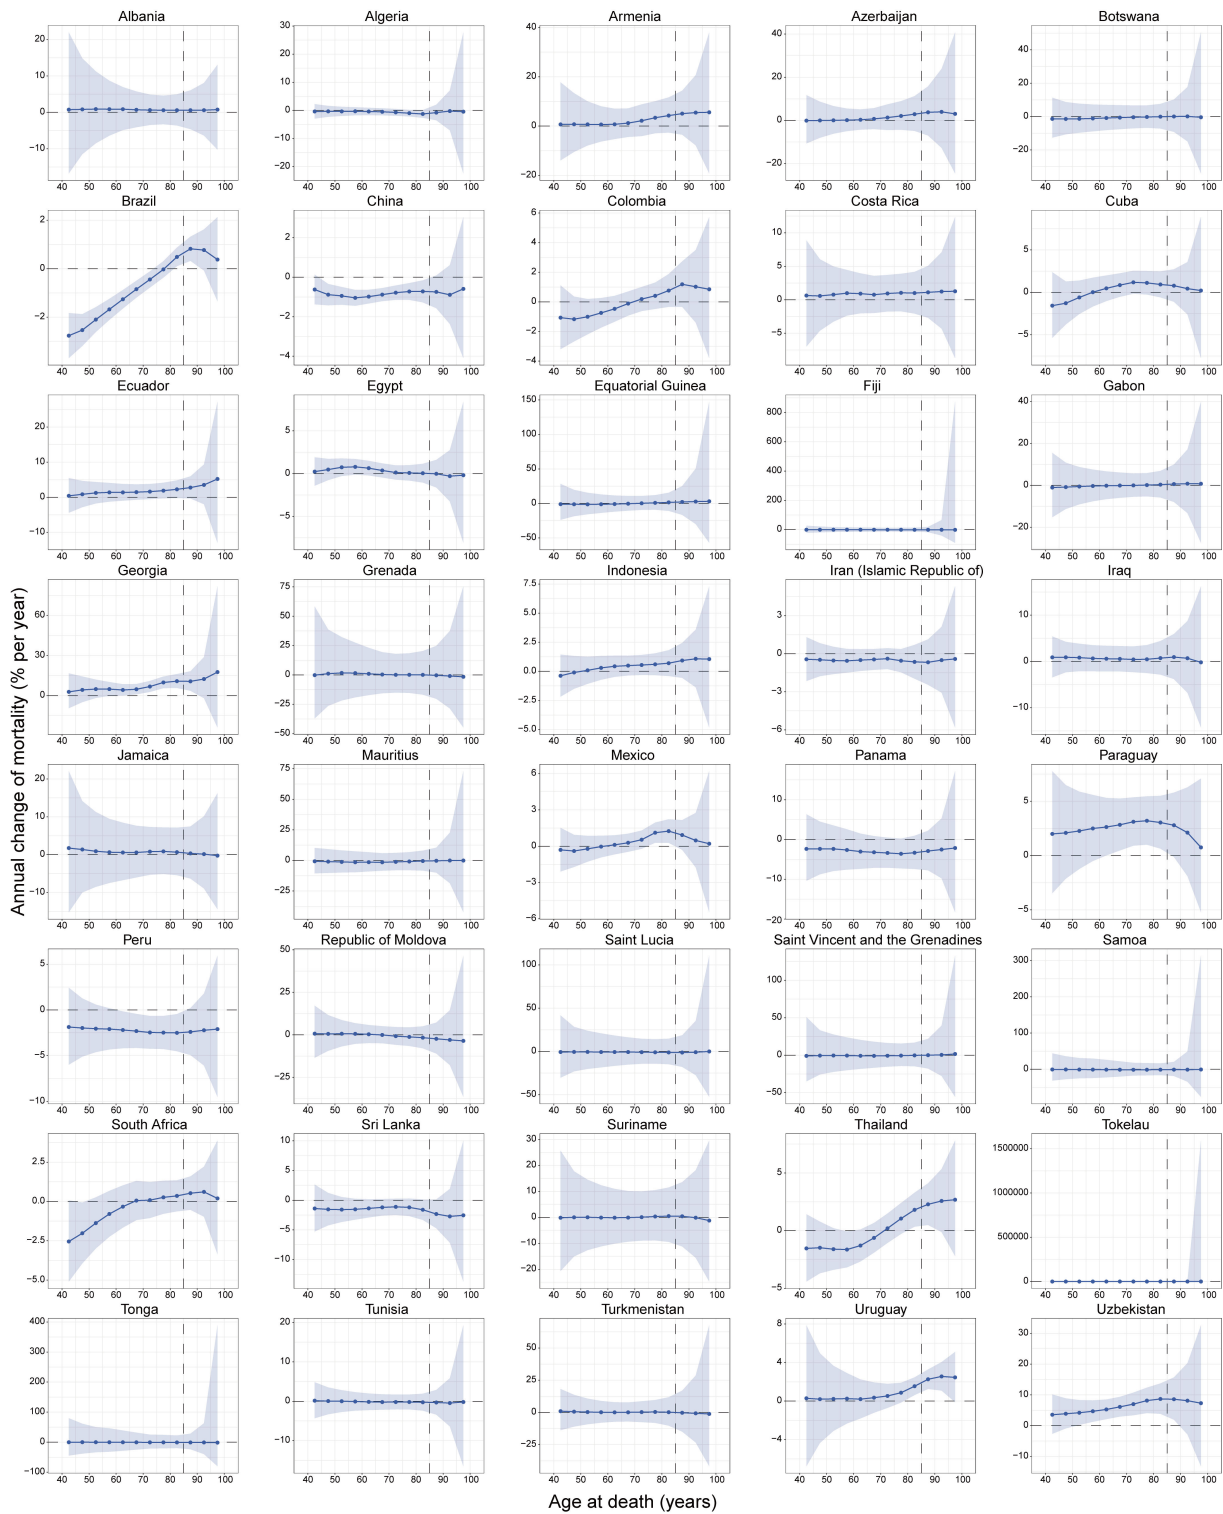

**Figure S20. The local drifts of CAVD mortality in middle SDI countries, 1990-2019. CAVD, calcific aortic valve disease; SDI, Socio-demographic Index.**

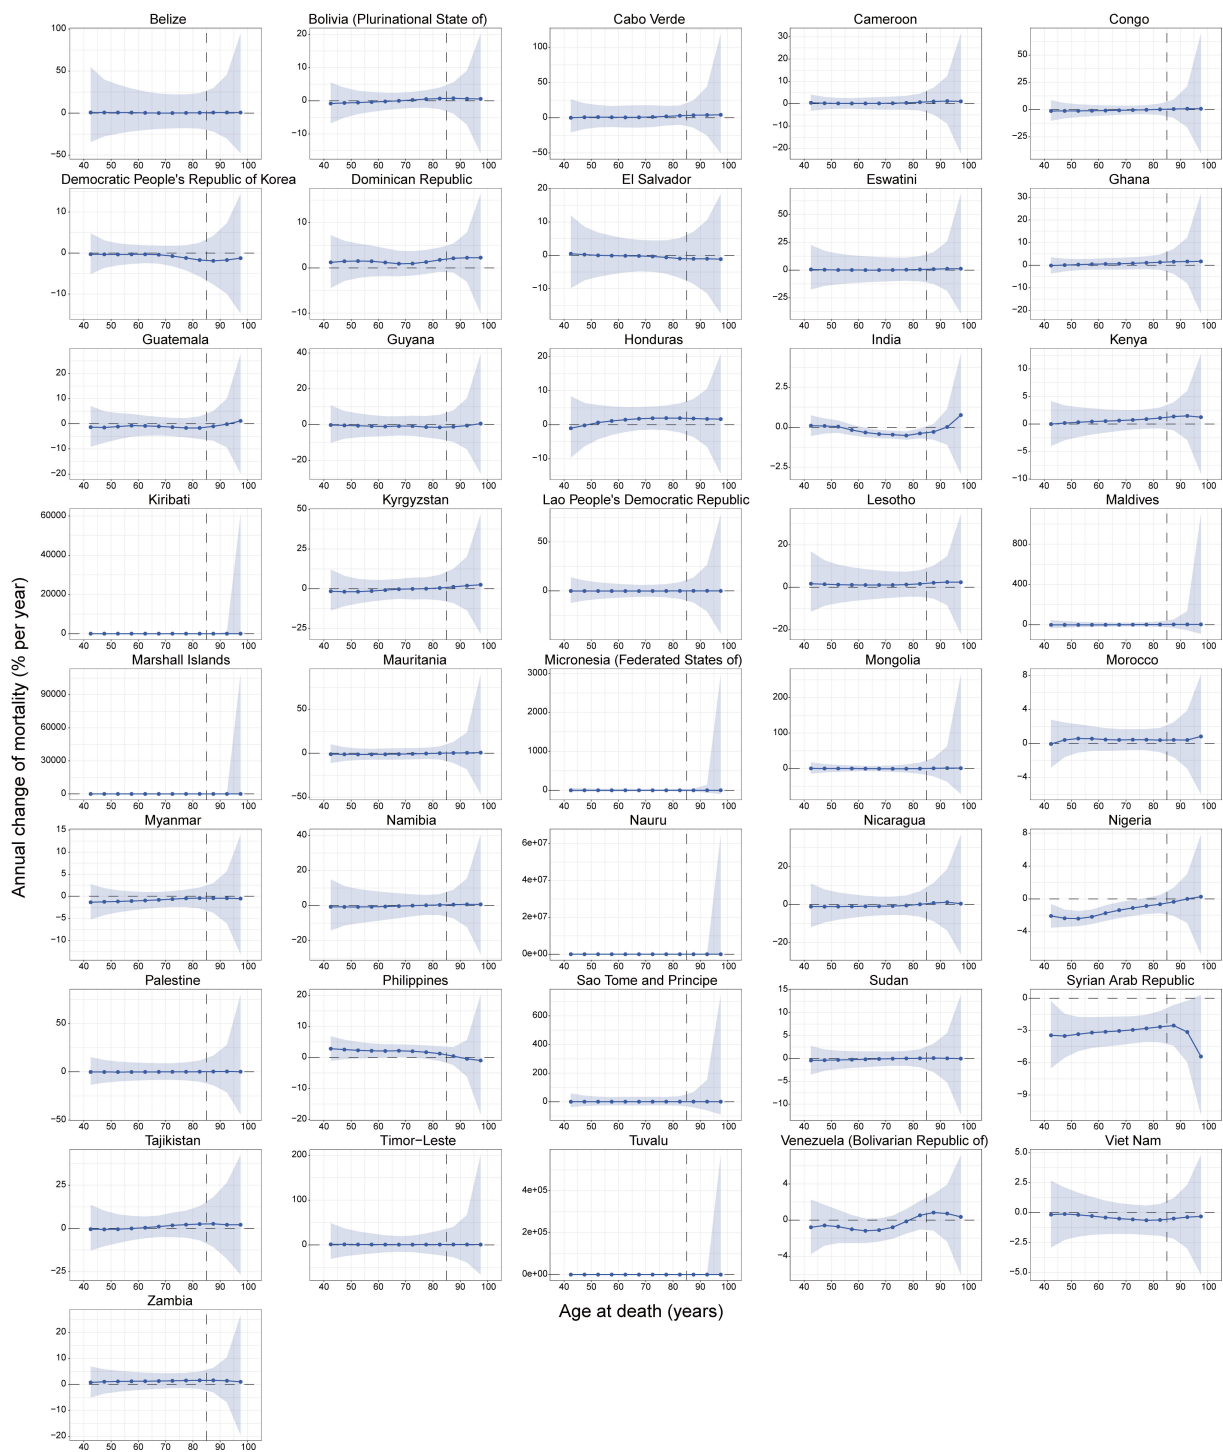

**Figure S21. The local drifts of CAVD mortality in low-middle SDI countries, 1990-2019.**  
 CAVD, calcific aortic valve disease; SDI, Socio-demographic Index.

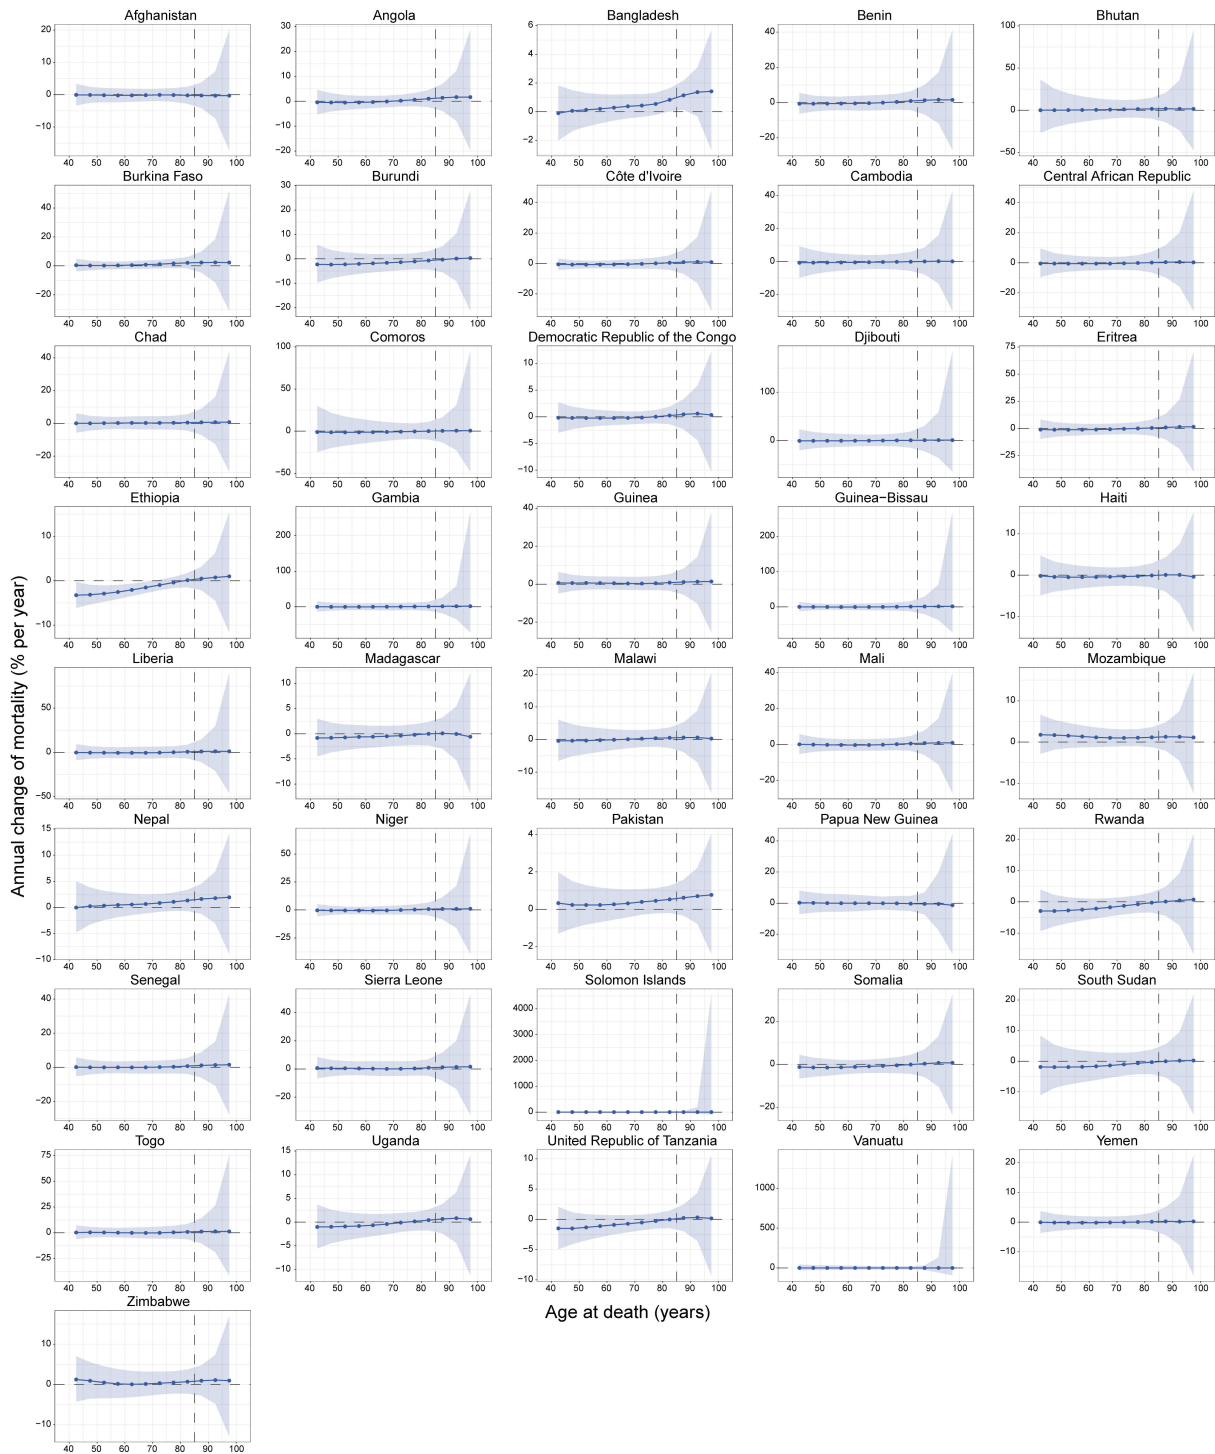

**Figure S22. The local drifts of CAVD mortality in low SDI countries, 1990-2019. CAVD, calcific aortic valve disease; SDI, Socio-demographic Index.**

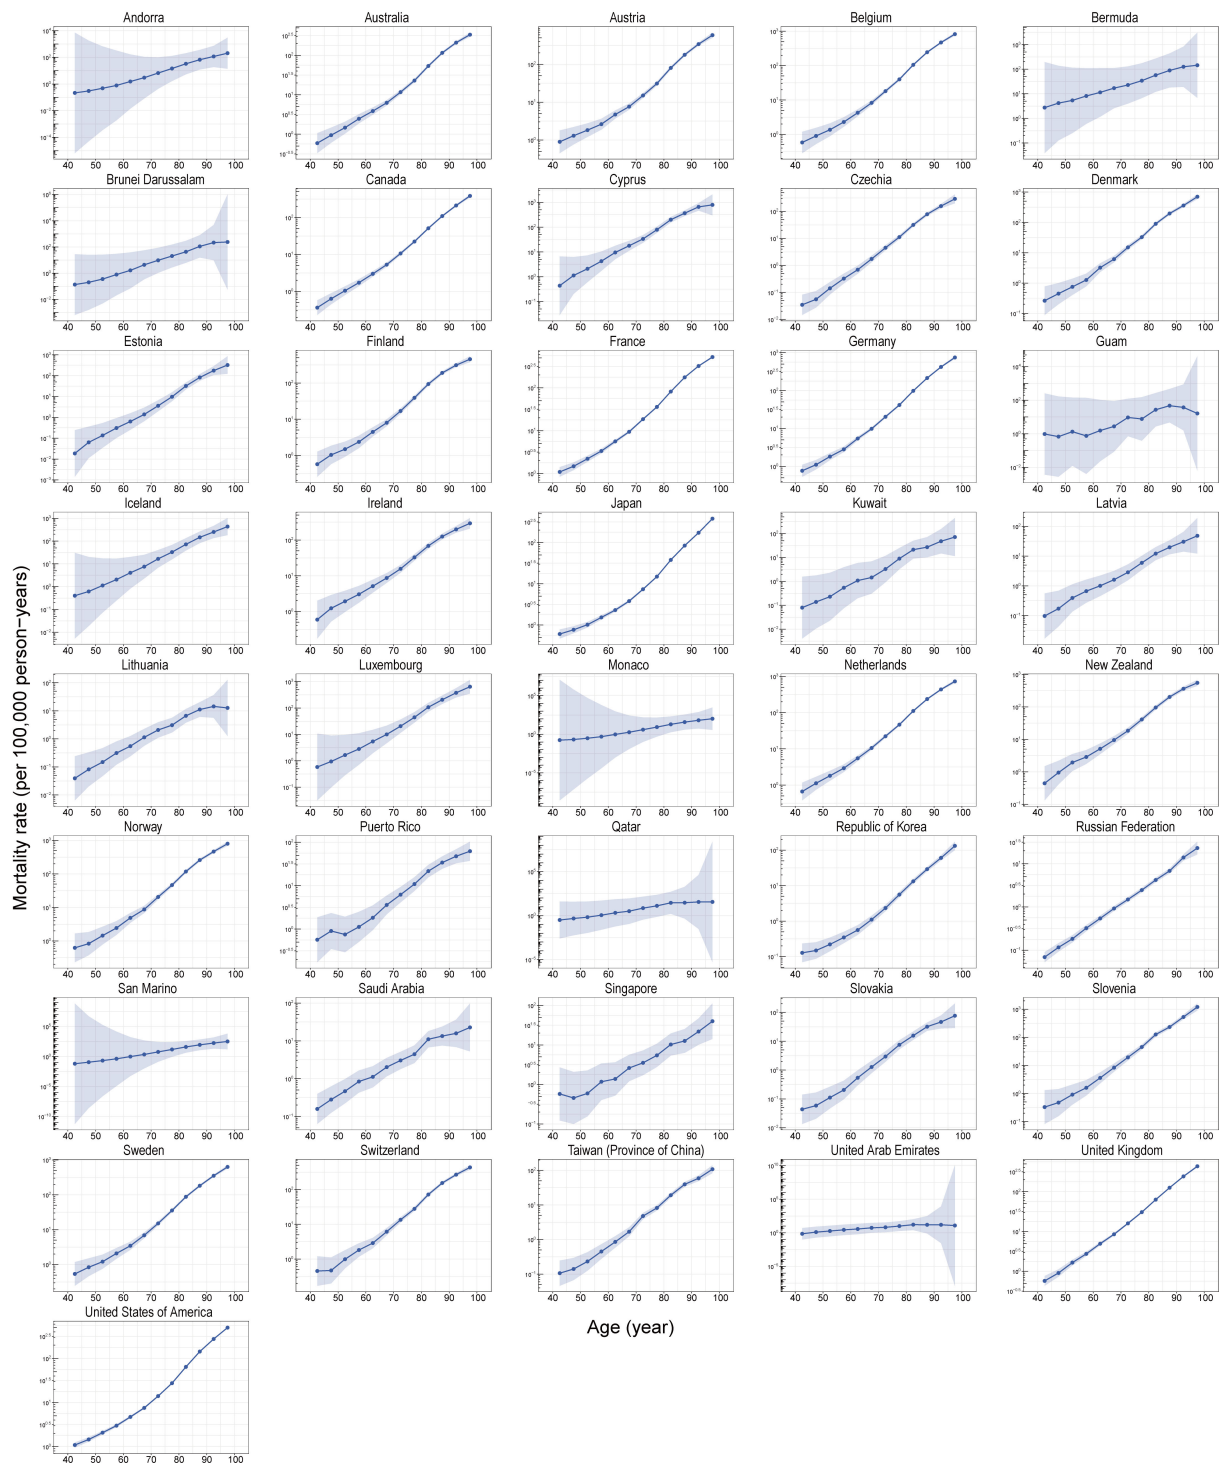

**Figure S23. Age effects on CAVD mortality in high SDI countries.** CAVD, calcific aortic valve disease; SDI, Socio-demographic Index.



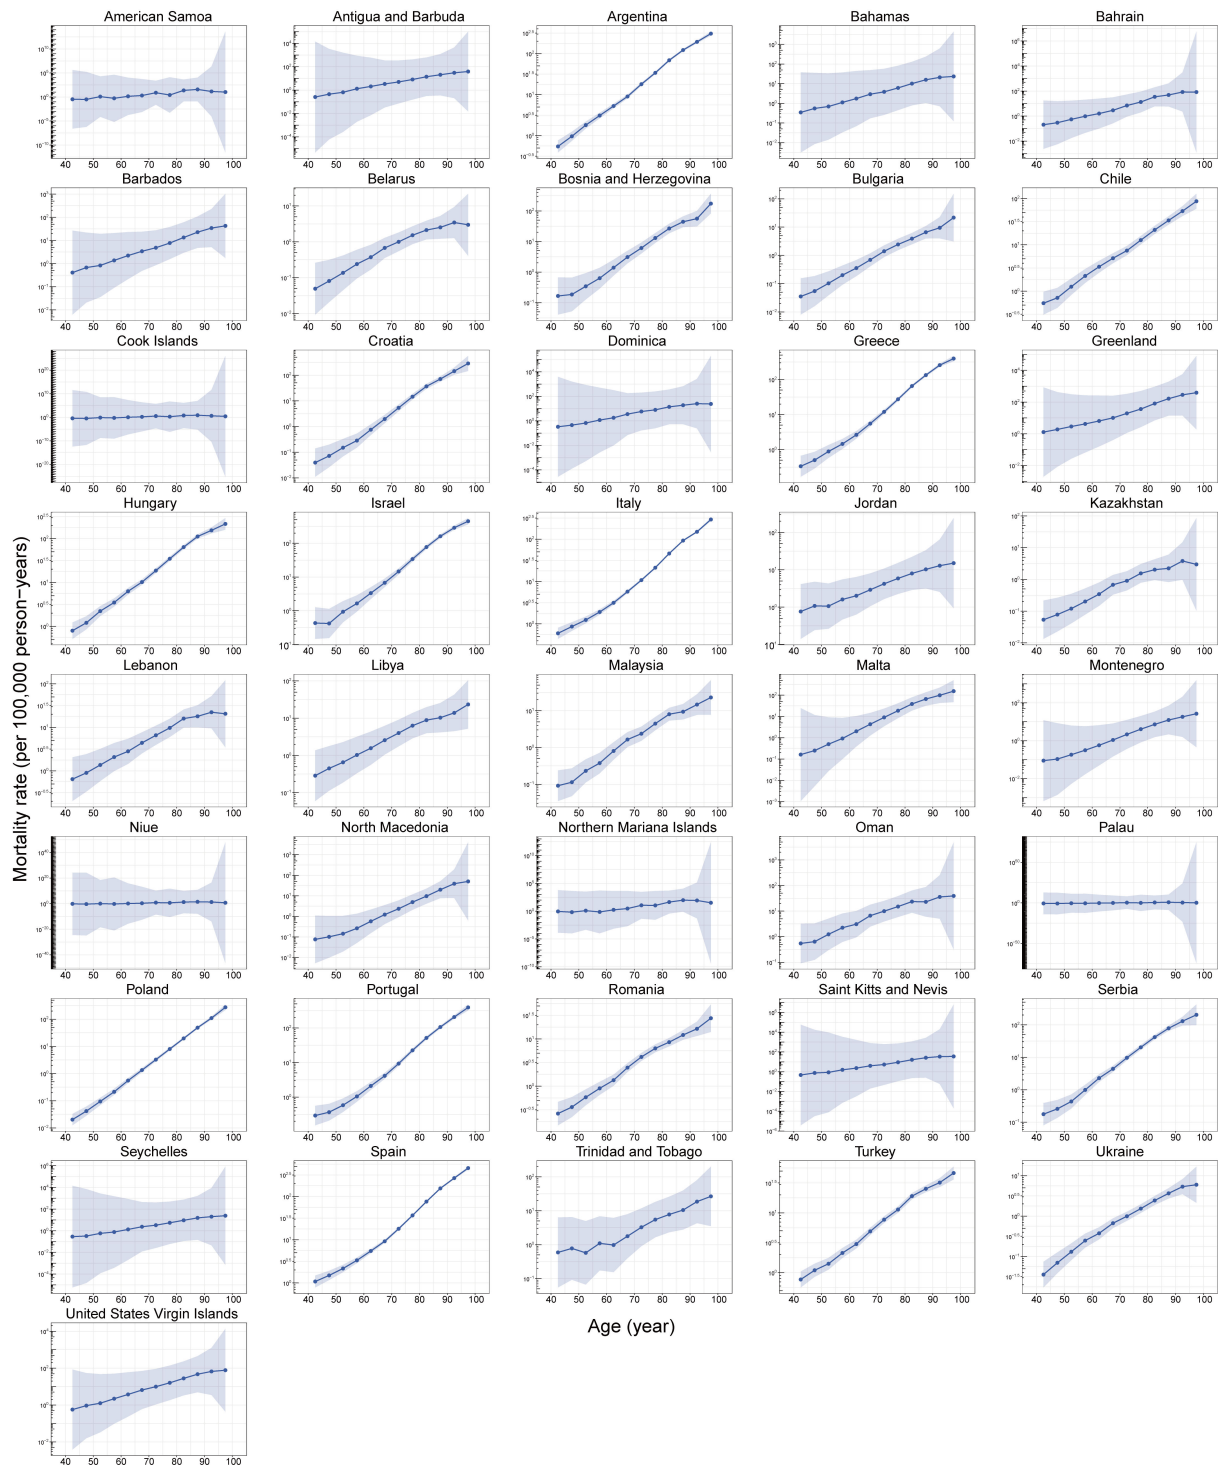

**Figure S24. Age effects on CAVD mortality in high-middle SDI countries.** CAVD, calcific aortic valve disease; SDI, Socio-demographic Index.

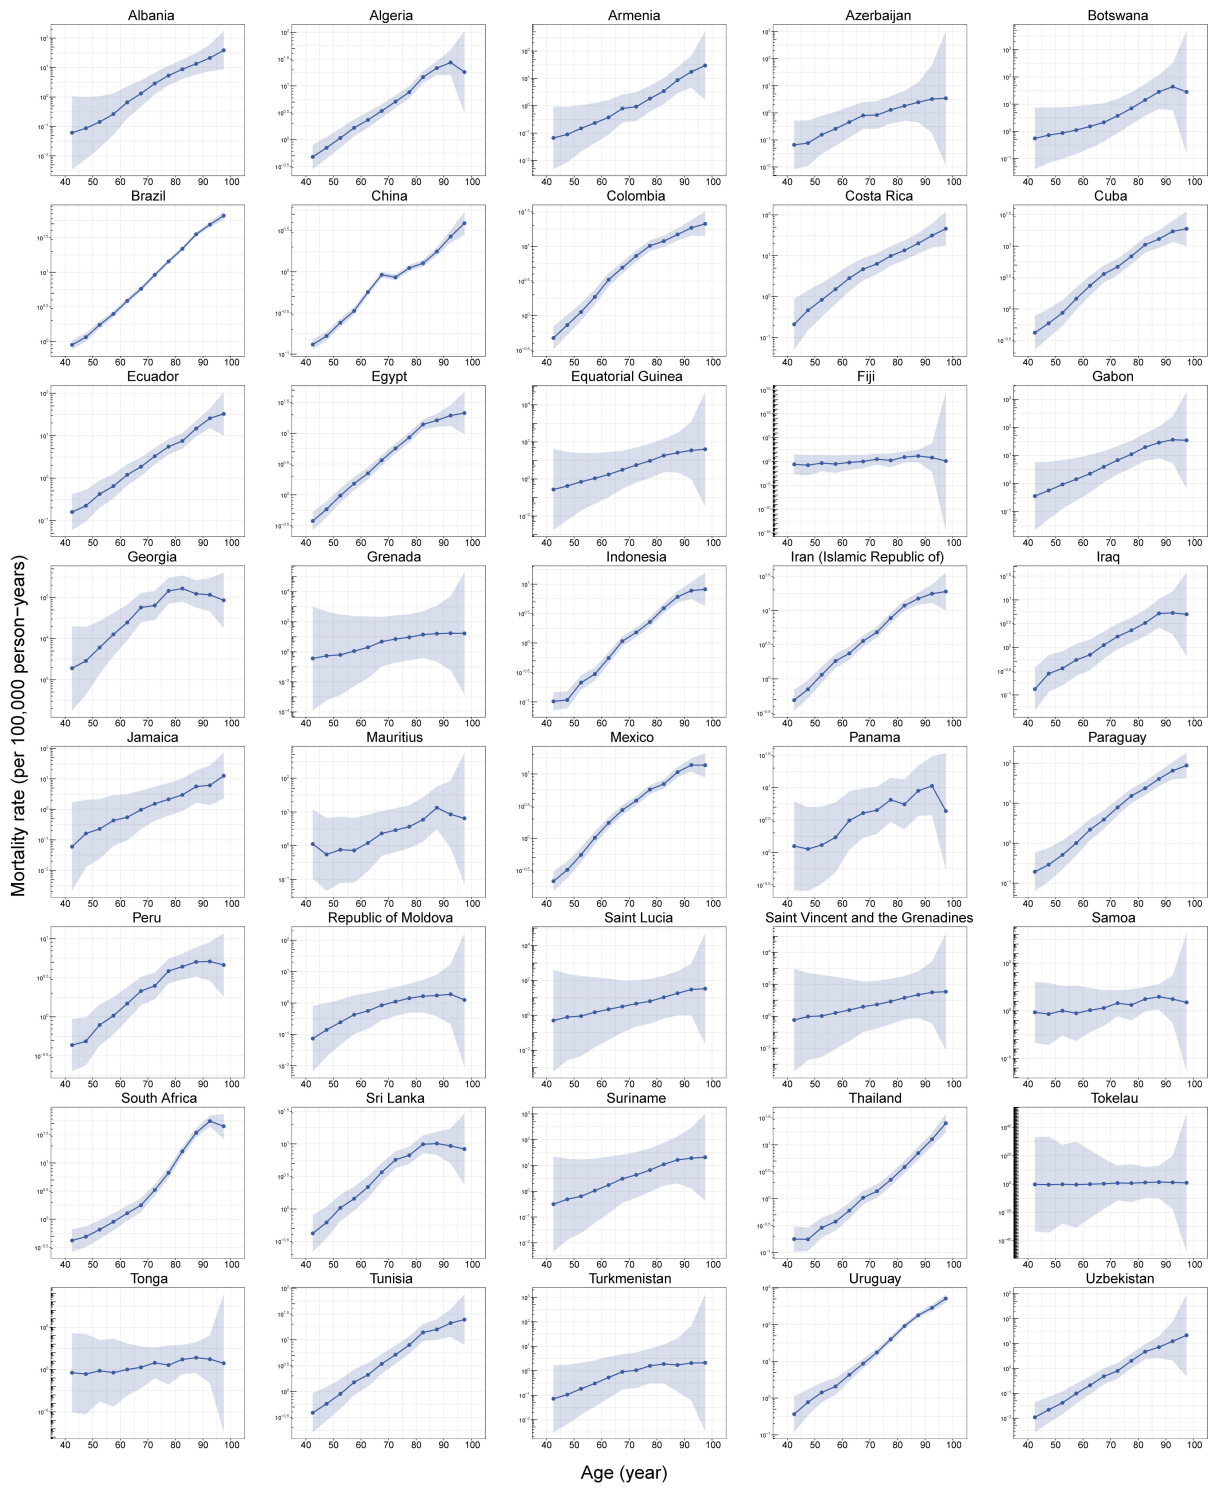

**Figure S25. Age effects on CAVD mortality in middle SDI countries.** CAVD, calcific aortic valve disease; SDI, Socio-demographic Index.

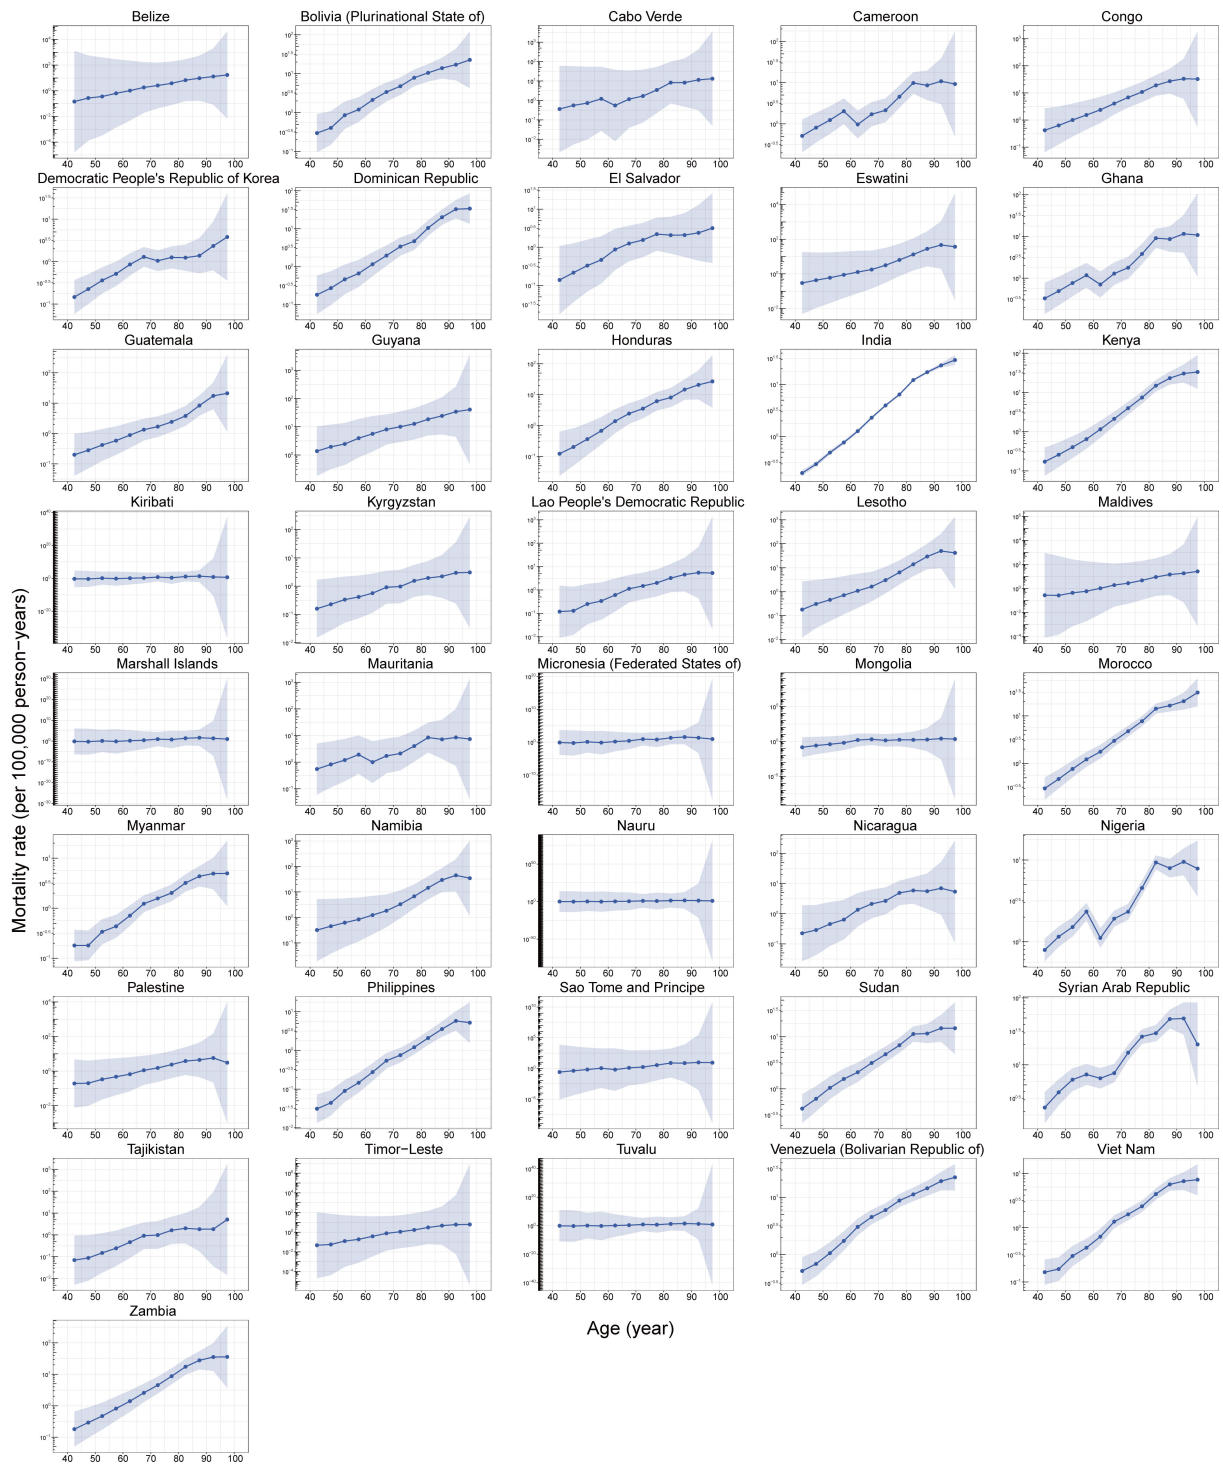

**Figure S26. Age effects on CAVD mortality in low-middle SDI countries.** CAVD, calcific aortic valve disease; SDI, Socio-demographic Index.

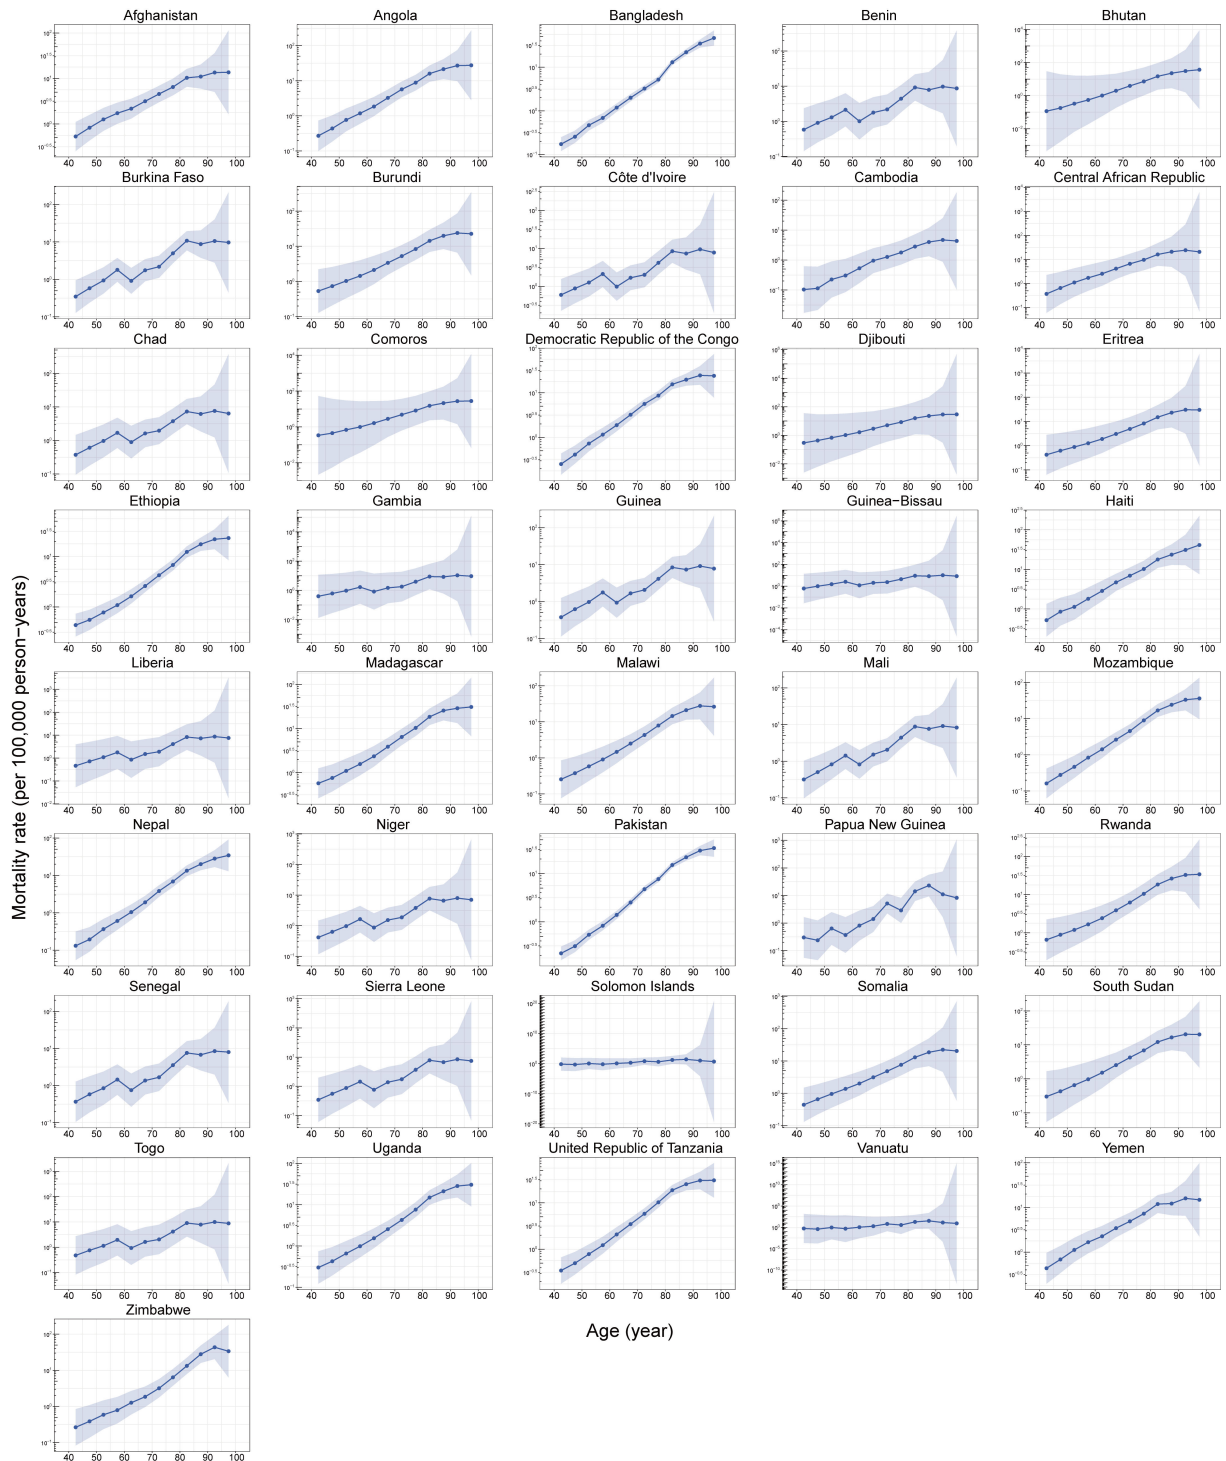

**Figure S27. Age effects on CAVD mortality in low SDI countries.** CAVD, calcific aortic valve disease; SDI, Socio-demographic Index.

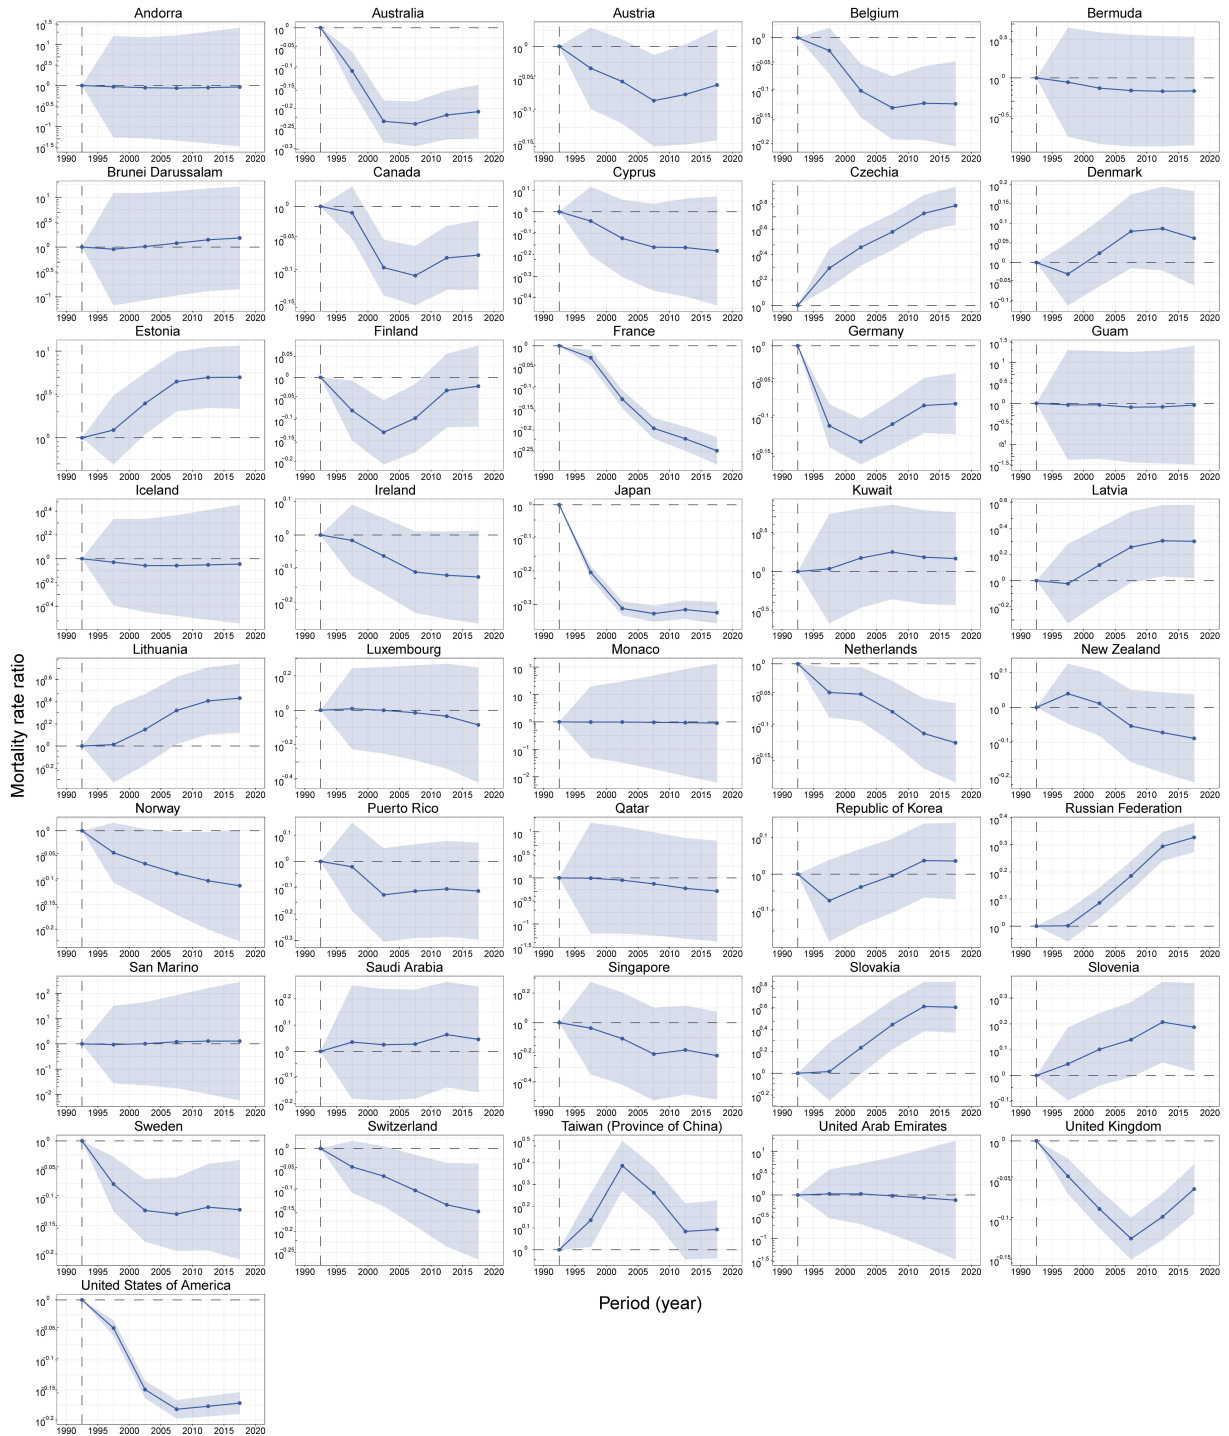

**Figure S28. Period effects on CAVD mortality in high SDI countries.** CAVD, calcific aortic valve disease; SDI, Socio-demographic Index.

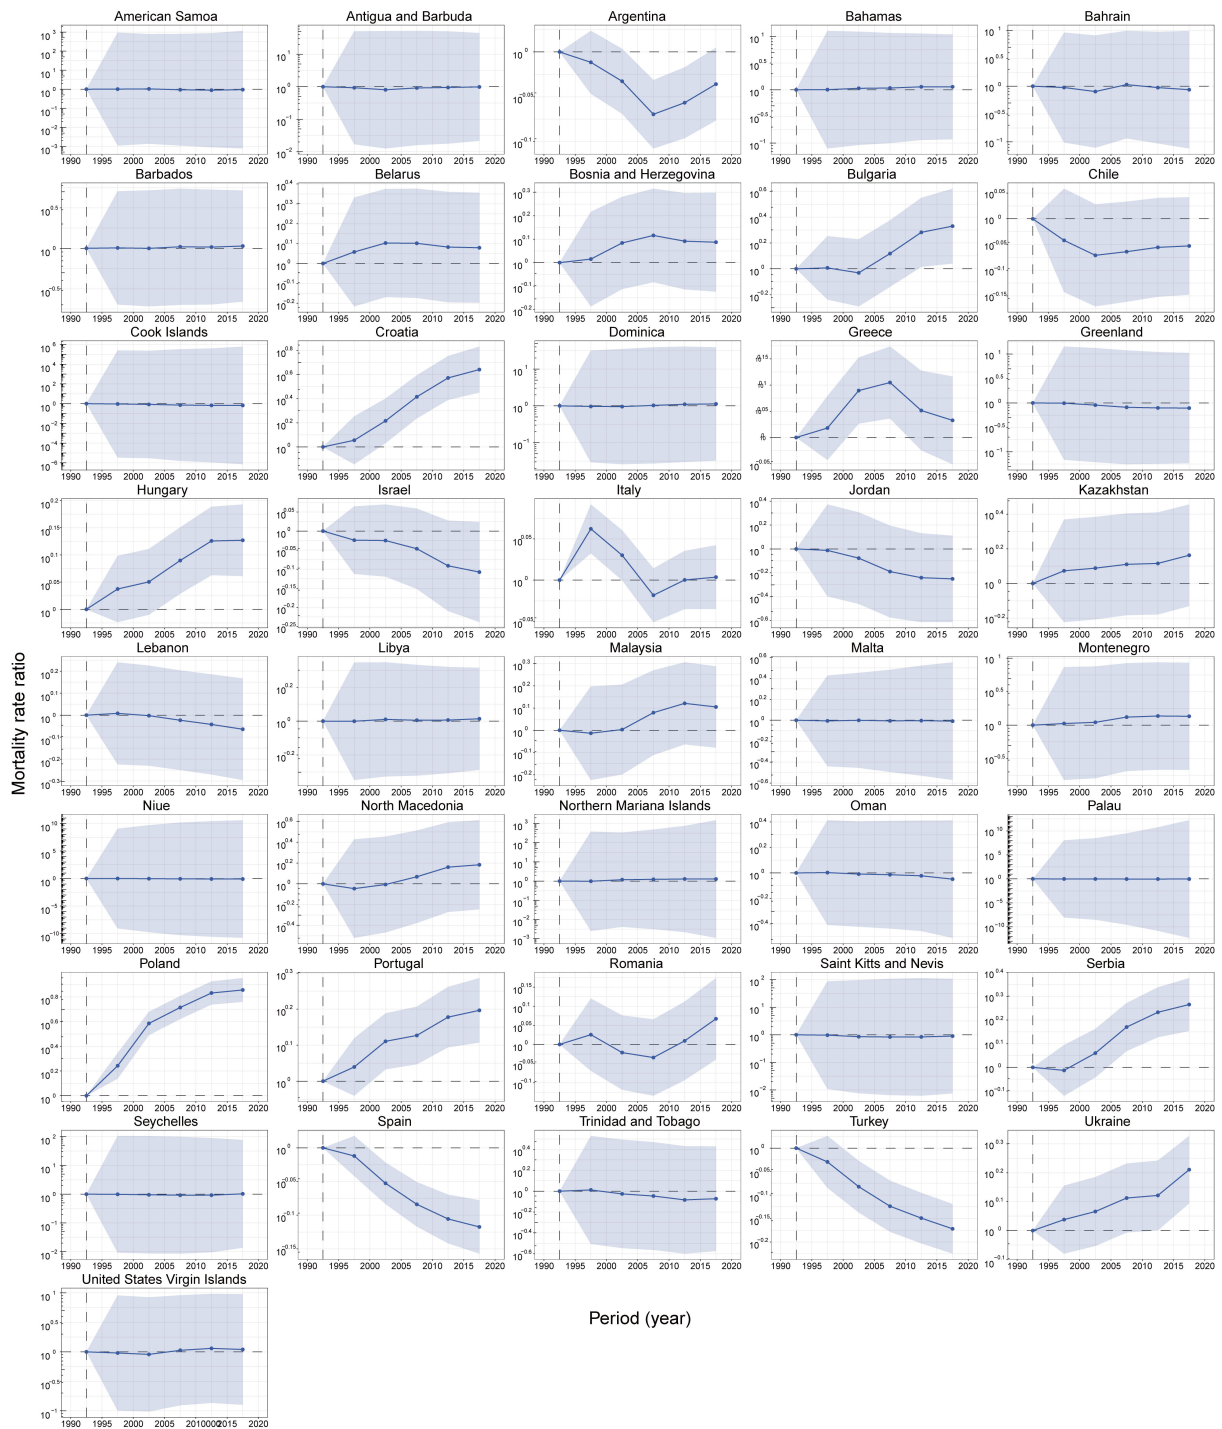

**Figure S29. Period effects on CAVD mortality in high-middle SDI countries.** CAVD, calcific aortic valve disease; SDI, Socio-demographic Index.

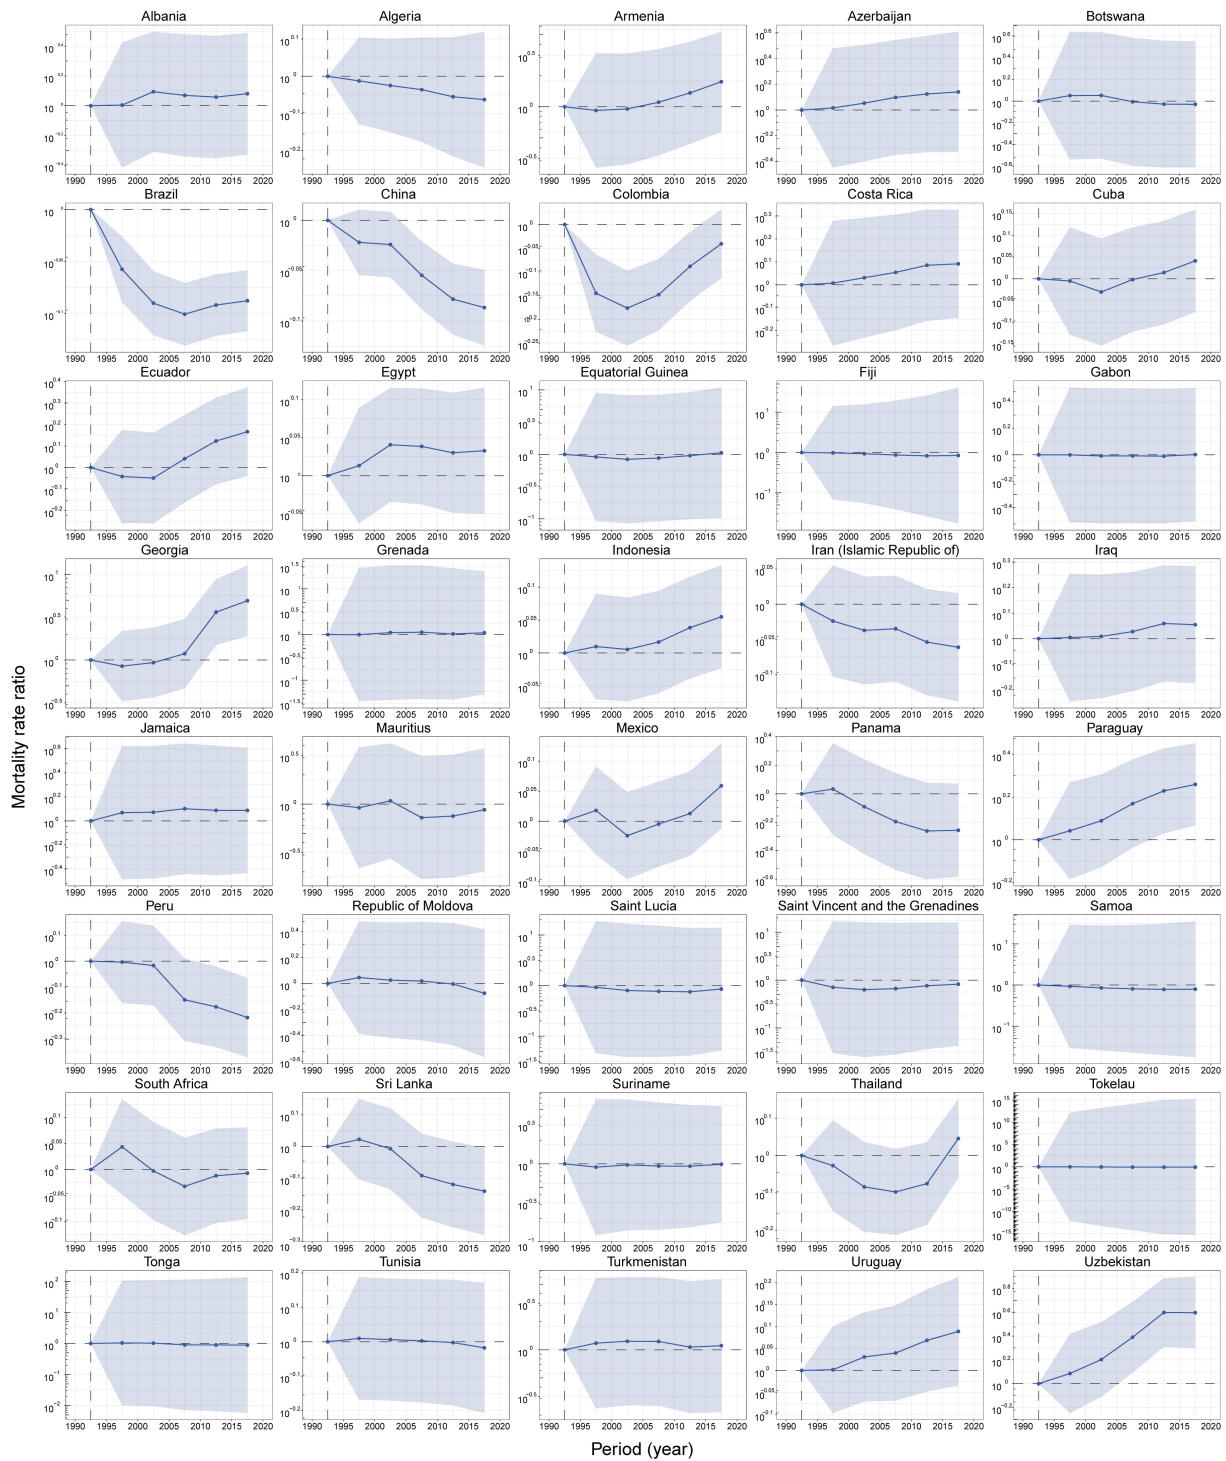

**Figure S30. Period effects on CAVD mortality in middle SDI countries.** CAVD, calcific aortic valve disease; SDI, Socio-demographic Index.

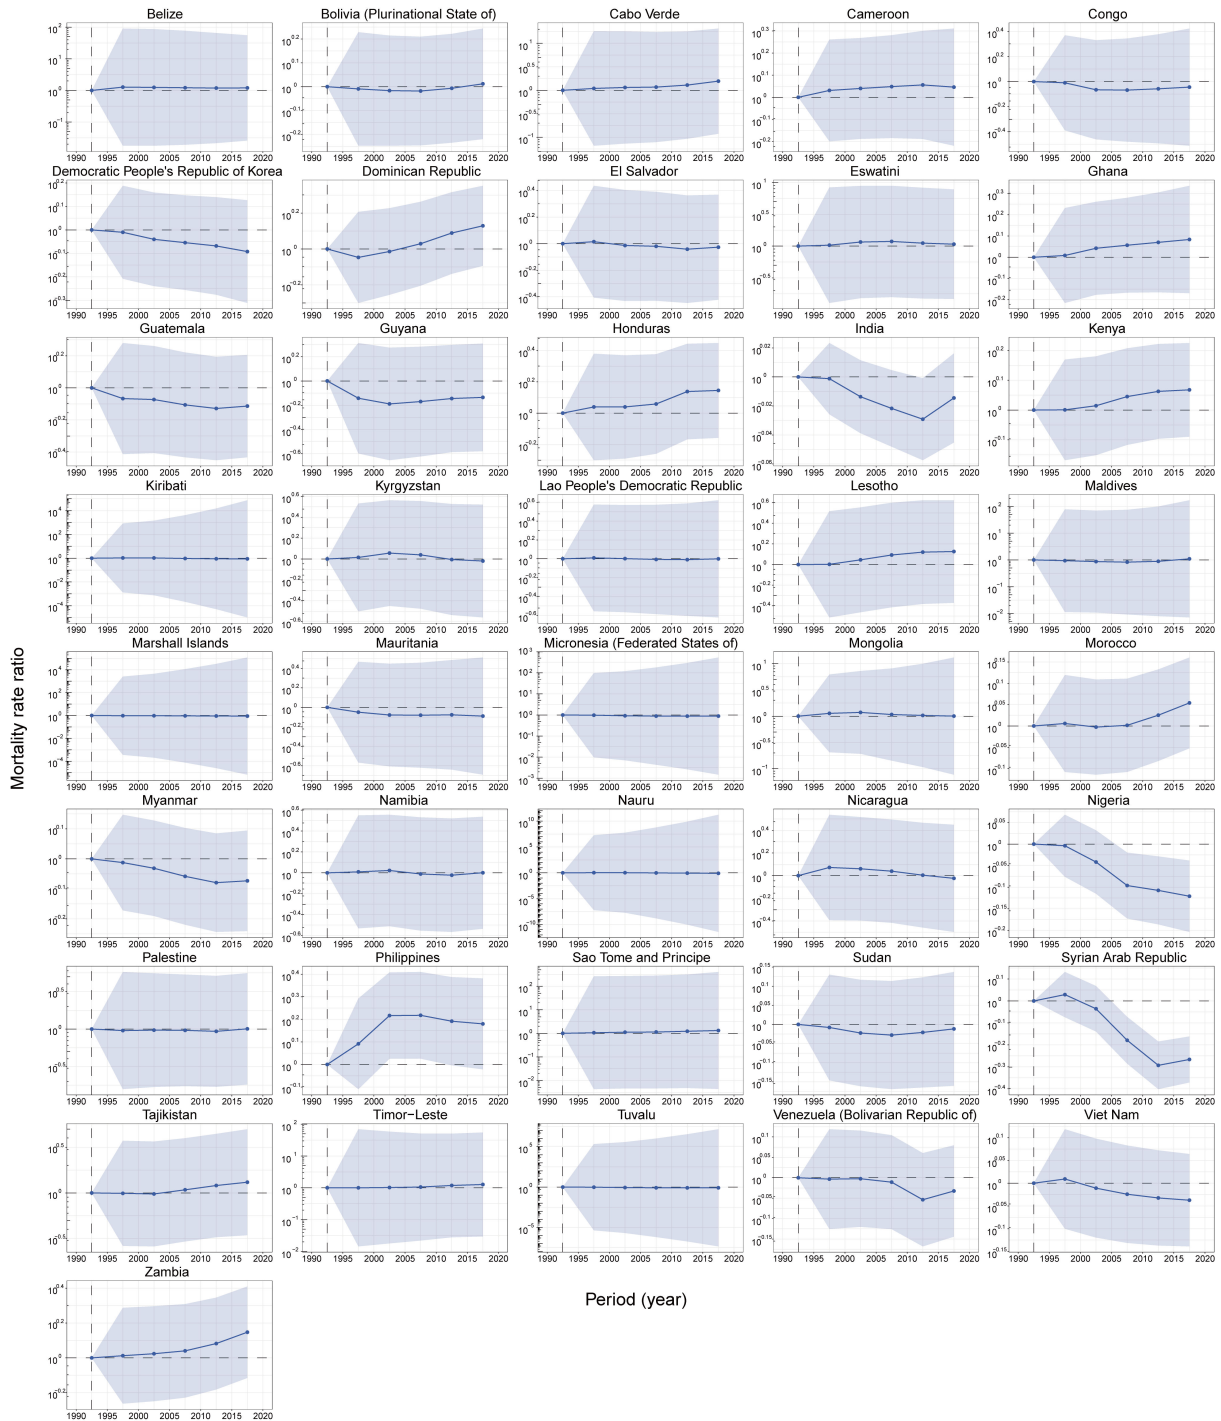

**Figure S31. Period effects on CAVD mortality in low-middle SDI countries.** CAVD, calcific aortic valve disease; SDI, Socio-demographic Index.



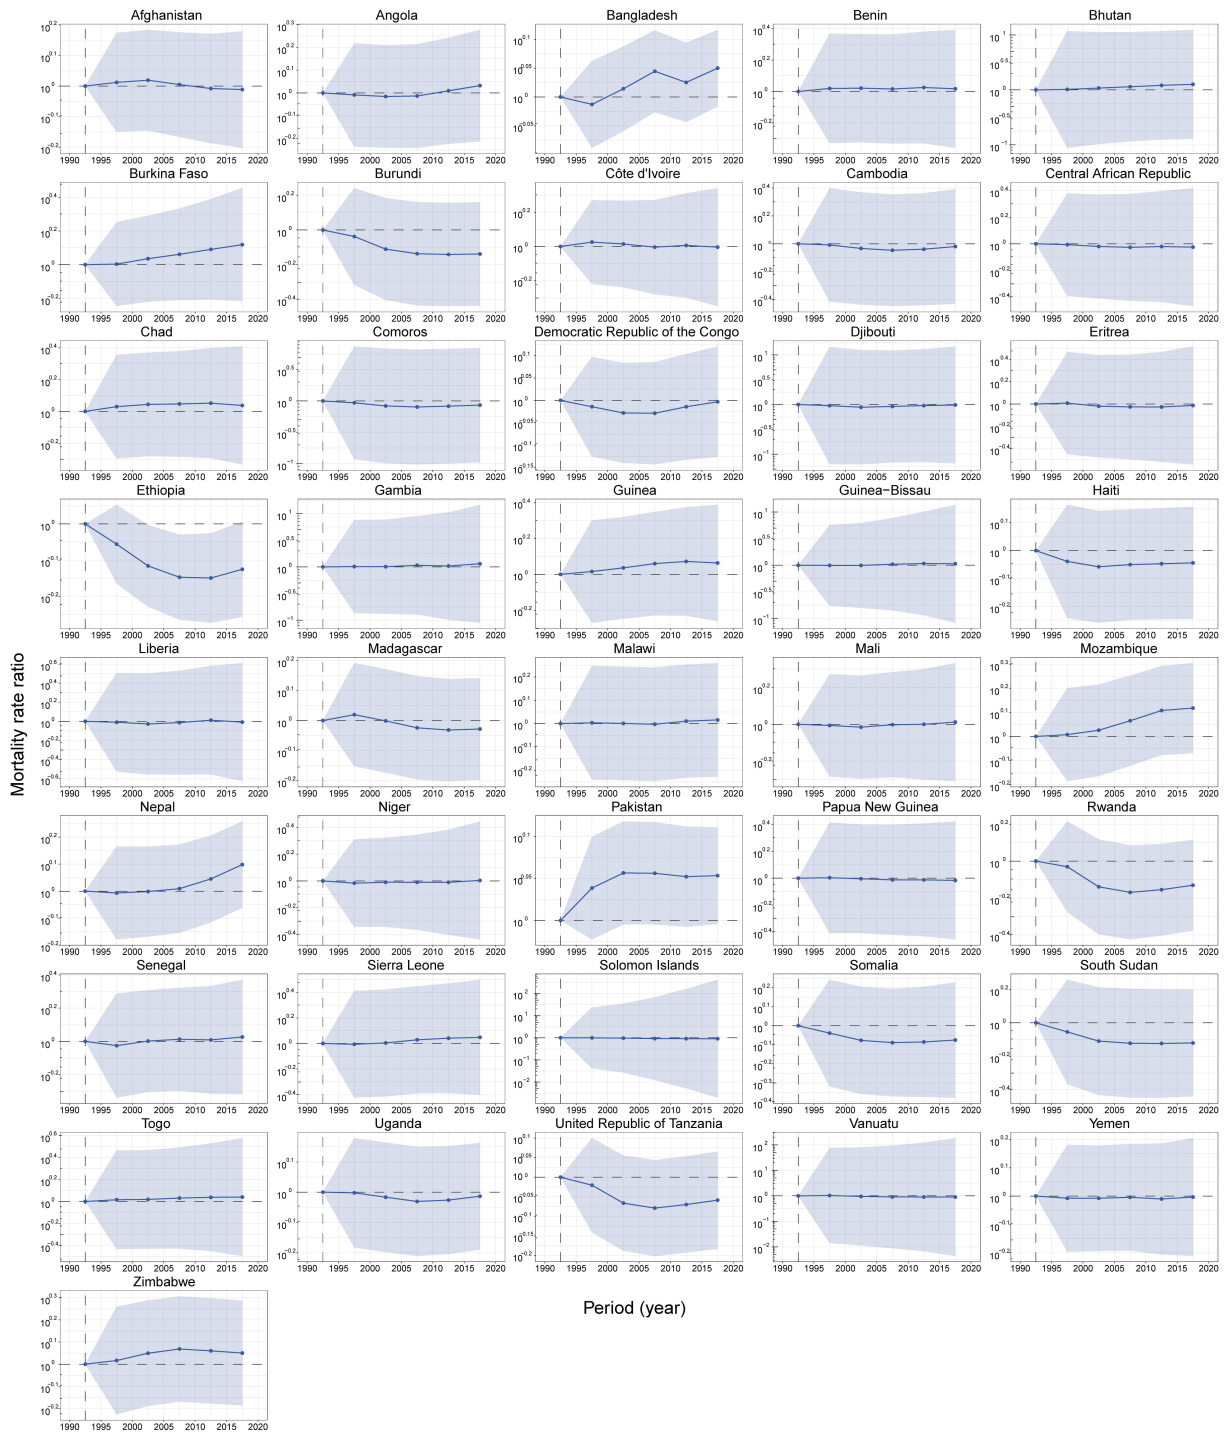

**Figure S32. Period effects on CAVD mortality in low SDI countries.** CAVD, calcific aortic valve disease; SDI, Socio-demographic Index.

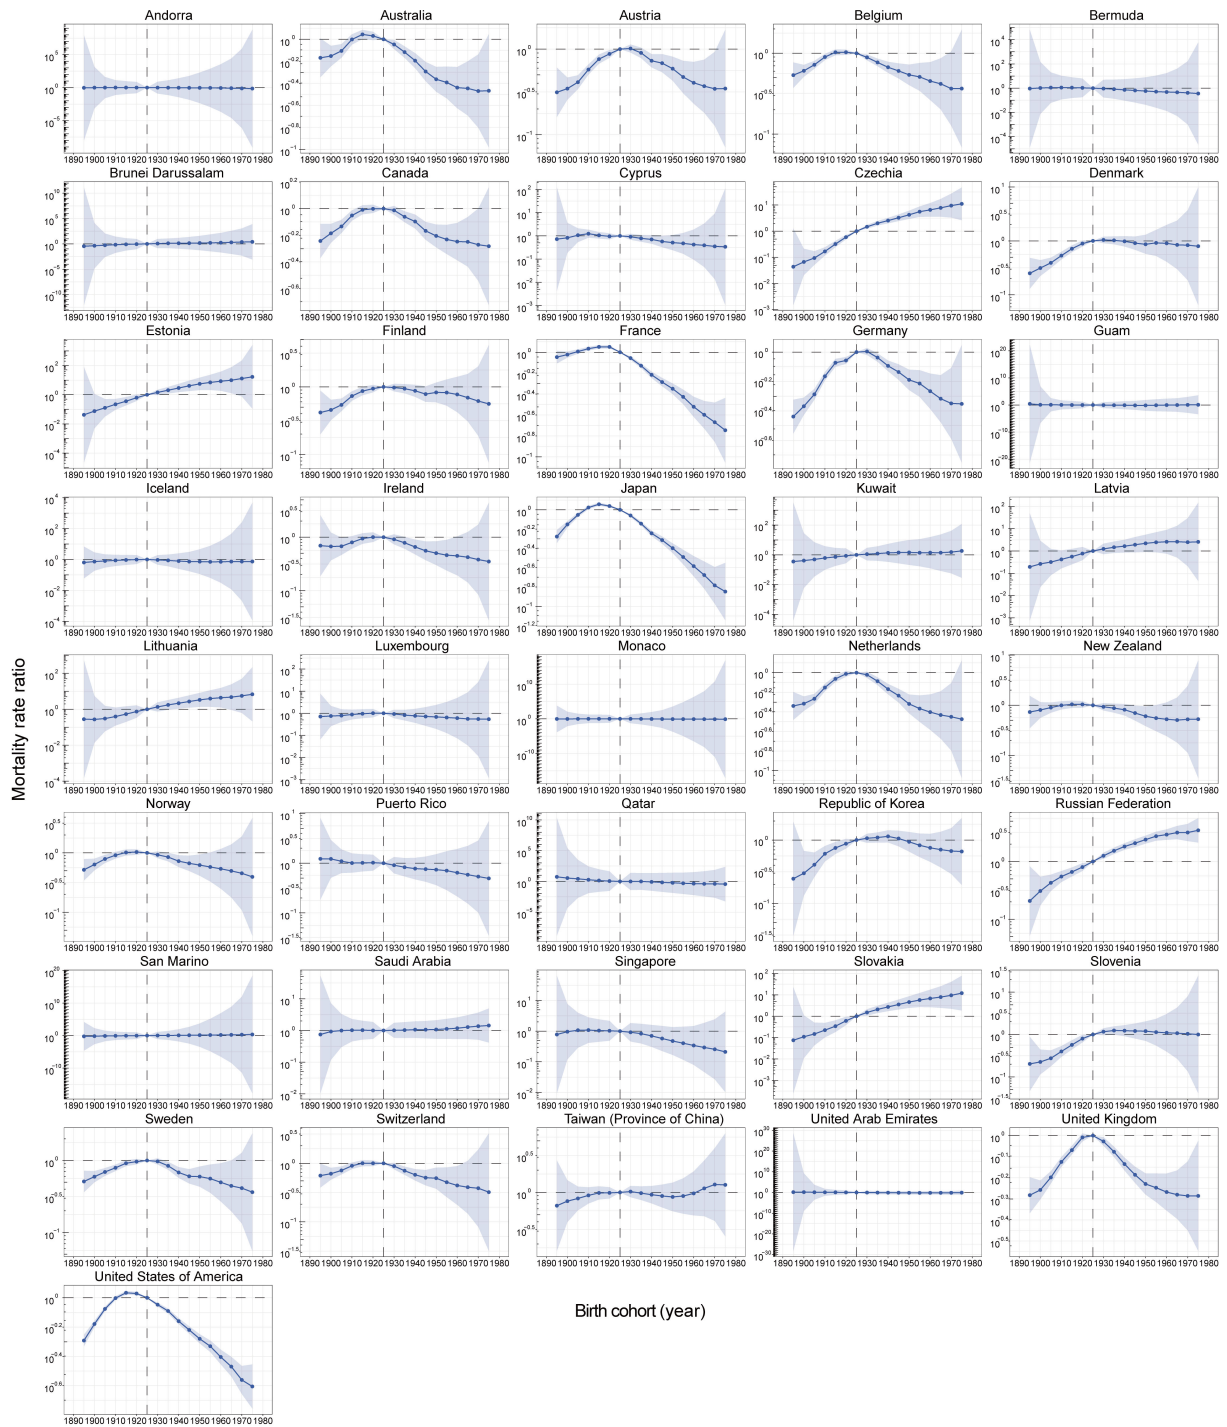

**Figure S33. Cohort effects on CAVD mortality in high SDI countries.** CAVD, calcific aortic valve disease; SDI, Socio-demographic Index.

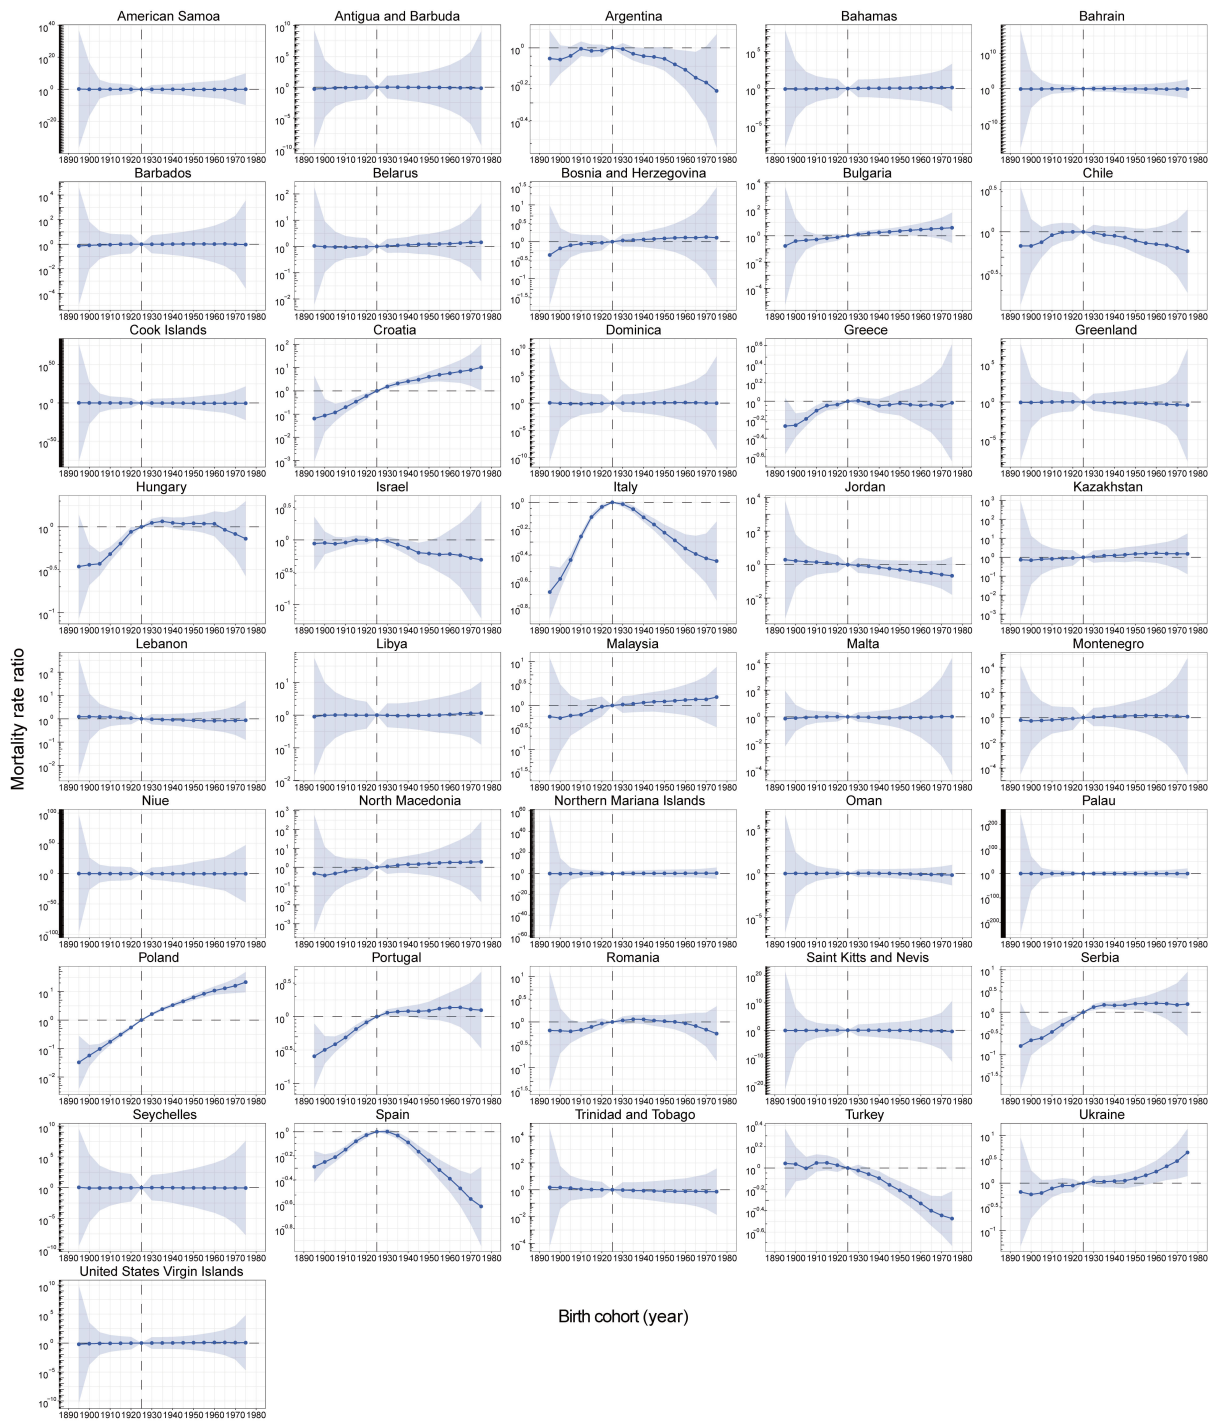

**Figure S34. Cohort effects on CAVD mortality in high-middle SDI countries.** CAVD, calcific aortic valve disease; SDI, Socio-demographic Index.

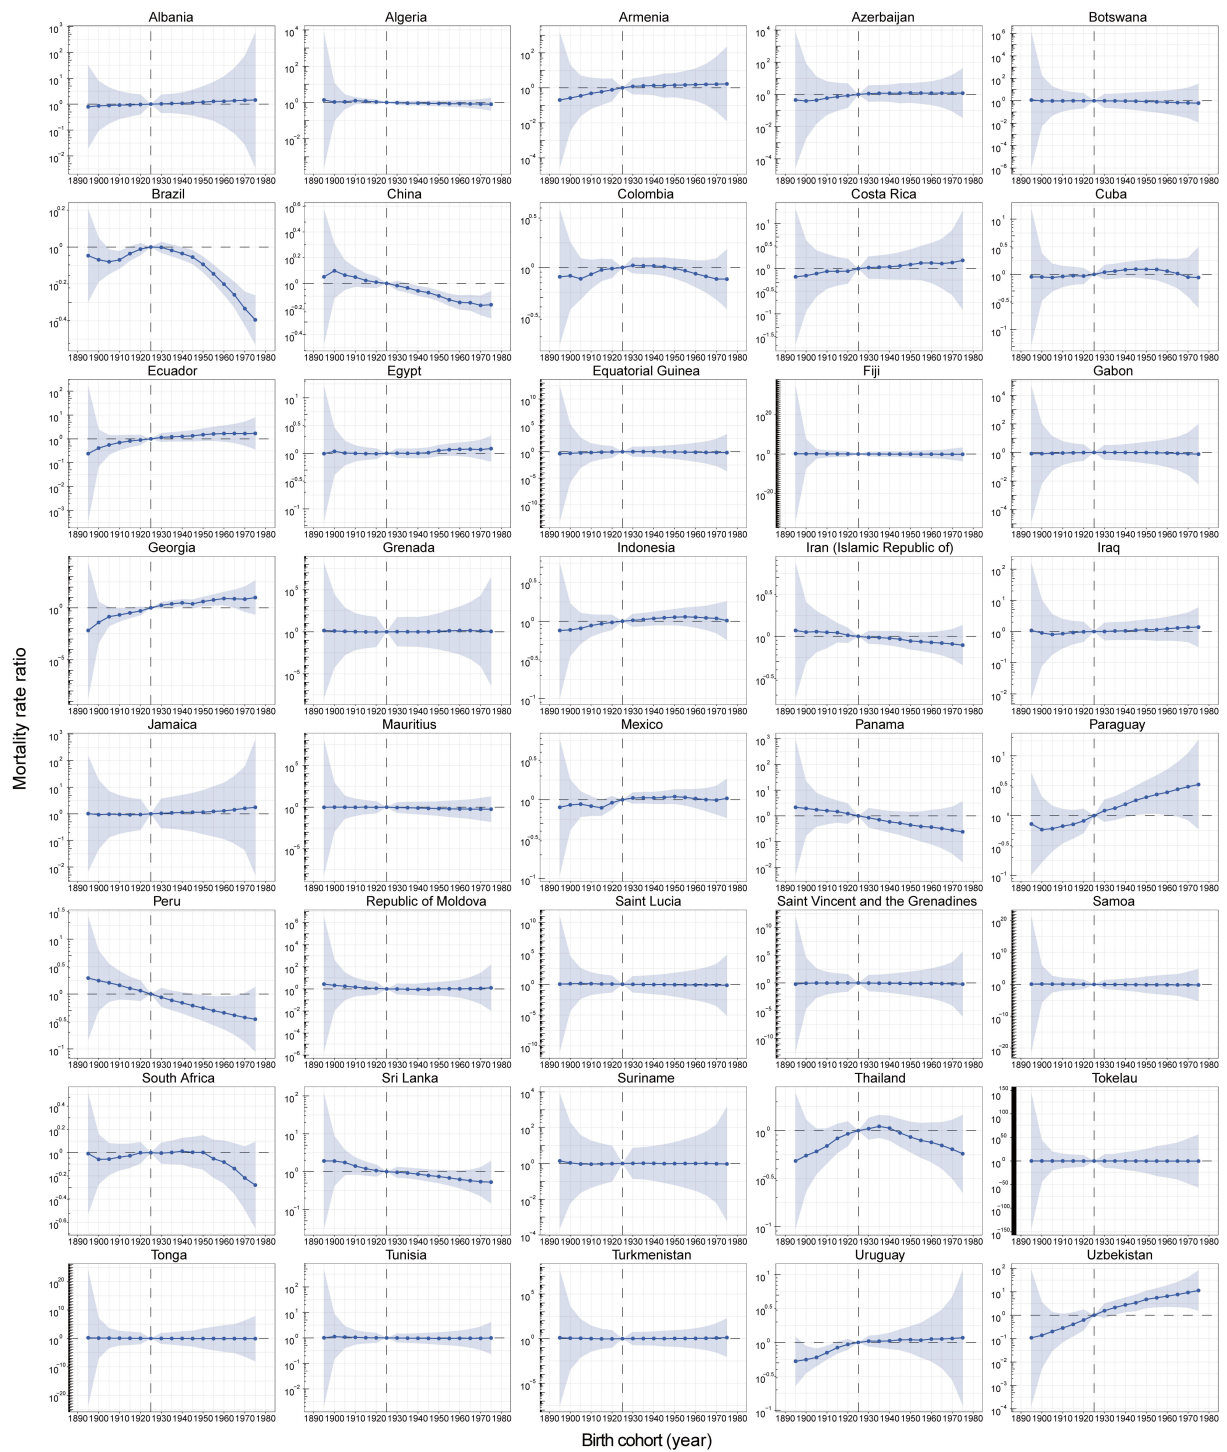

**Figure S35. Cohort effects on CAVD mortality in middle SDI countries.** CAVD, calcific aortic valve disease; SDI, Socio-demographic Index.

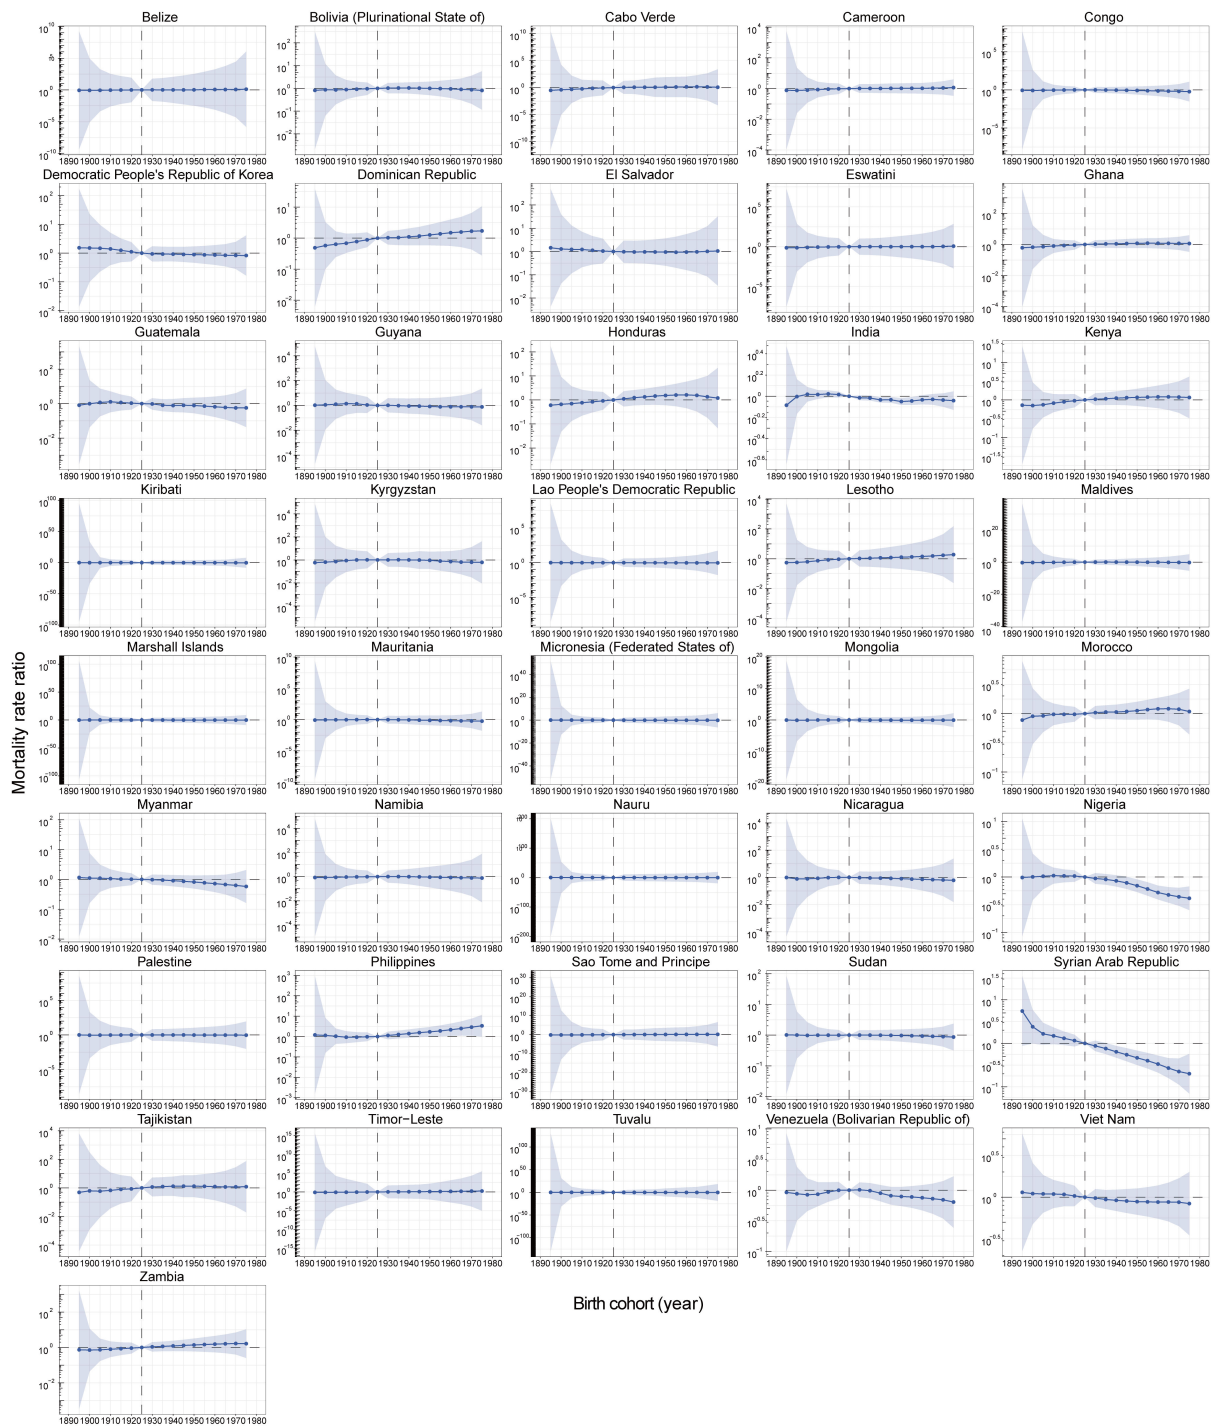

**Figure S36. Cohort effects on CAVD mortality in low-middle SDI countries.** CAVD, calcific aortic valve disease; SDI, Socio-demographic Index.

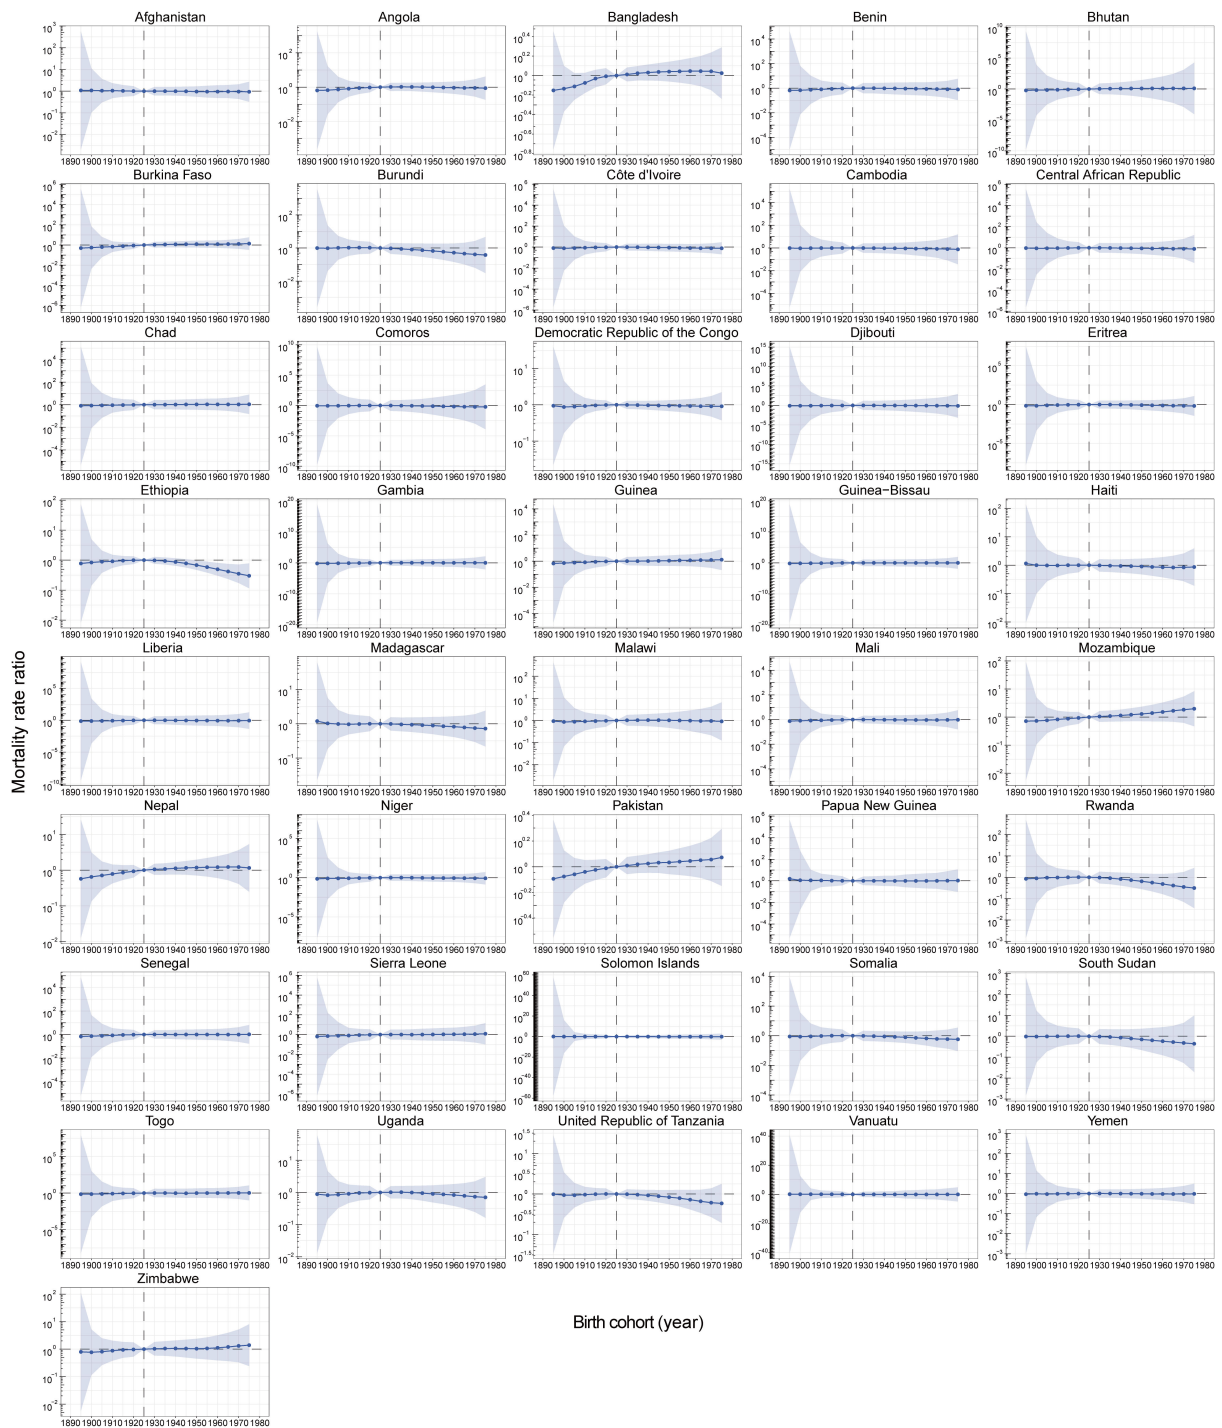

**Figure S37. Cohort effects on CAVD mortality in low SDI countries.** CAVD, calcific aortic valve disease; SDI, Socio-demographic Index.
